# Supplementary material for: Competitive double-switched self-assembled cyclic peptide nanotubes: a dual internal and external control
Source: Royal Society of Chemistry journal article supplement (doi:10.1039/c9cp02327e), 2019-01-01
Supplement: c9cp02327e1.pdf [file c9cp02327e1.pdf]

## **Competitive double-switched Self-Assembled Cyclic Peptide Nanotubes: a dual internal and external control**

*Martín Calvelo, Juan R. Granja, Rebeca Garcia-Fandiño\**

Centro Singular de Investigación en Química Biolóxica e Materiais Moleculares (CiQUS), Departamento de  
Química Orgánica, Universidade de Santiago de Compostela, 15782 Santiago de Compostela (Spain)

\*To whom correspondence should be addressed.

E-mail: [rebeca.garcia.fandino@usc.es](mailto:rebeca.garcia.fandino@usc.es)

## **Supporting Information**

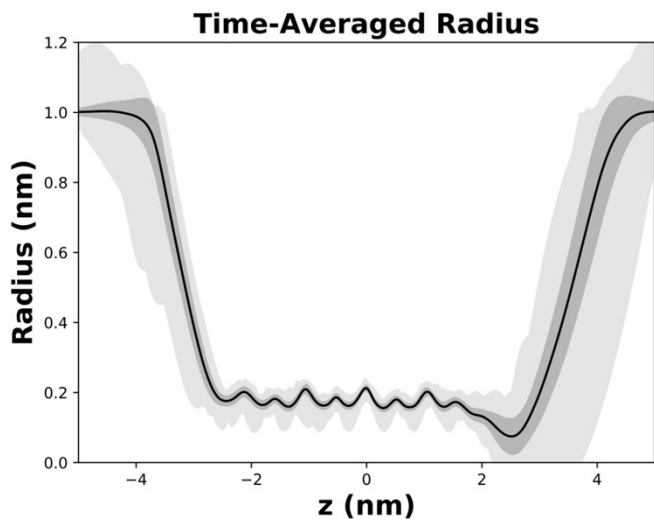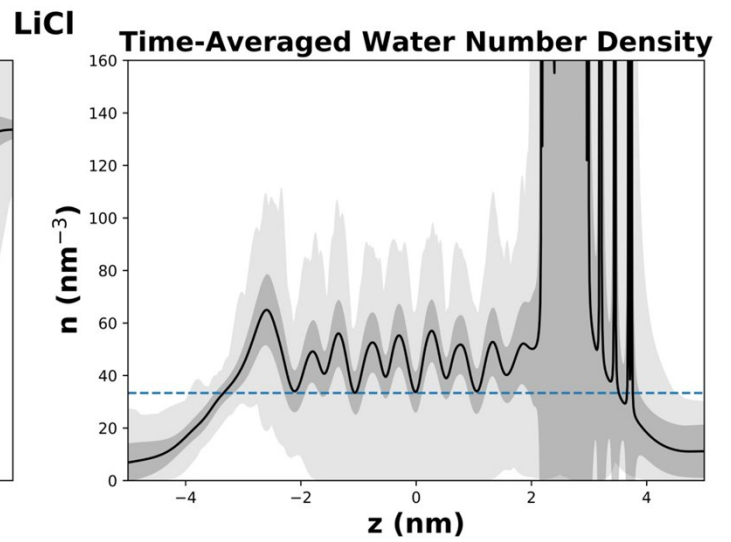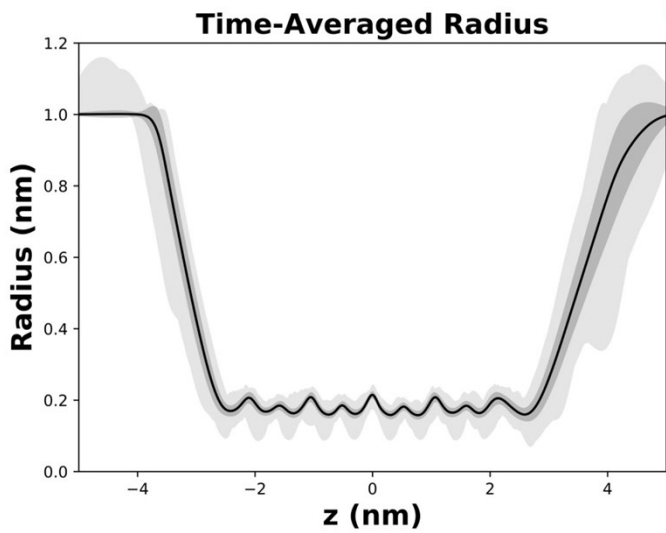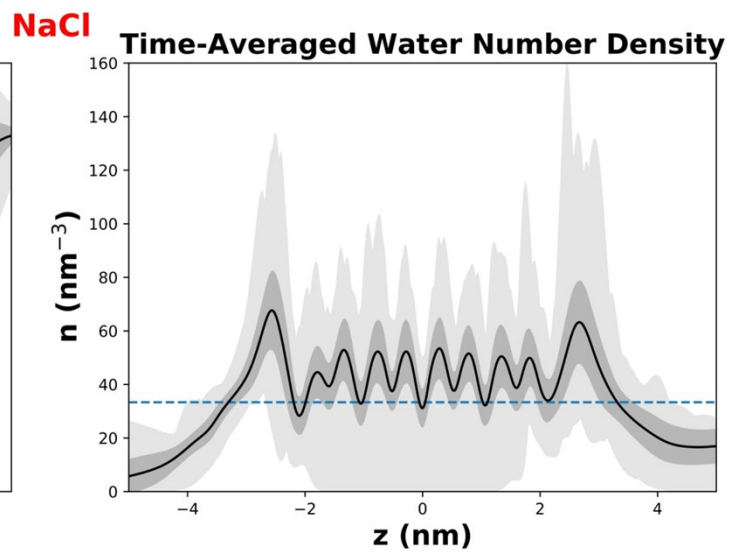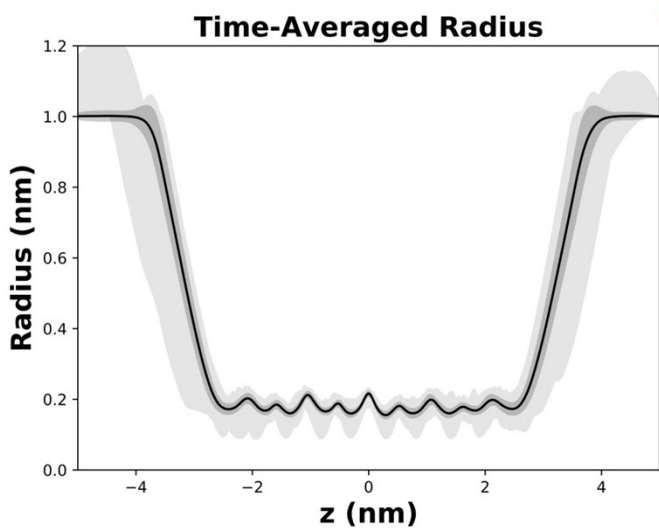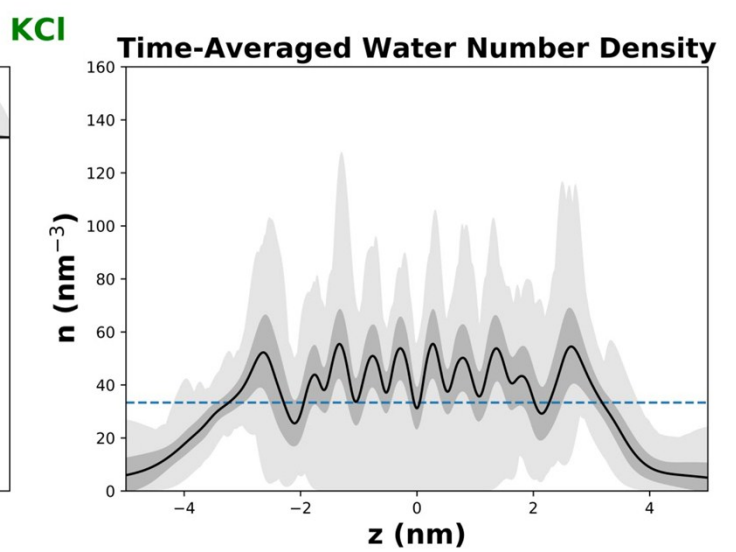

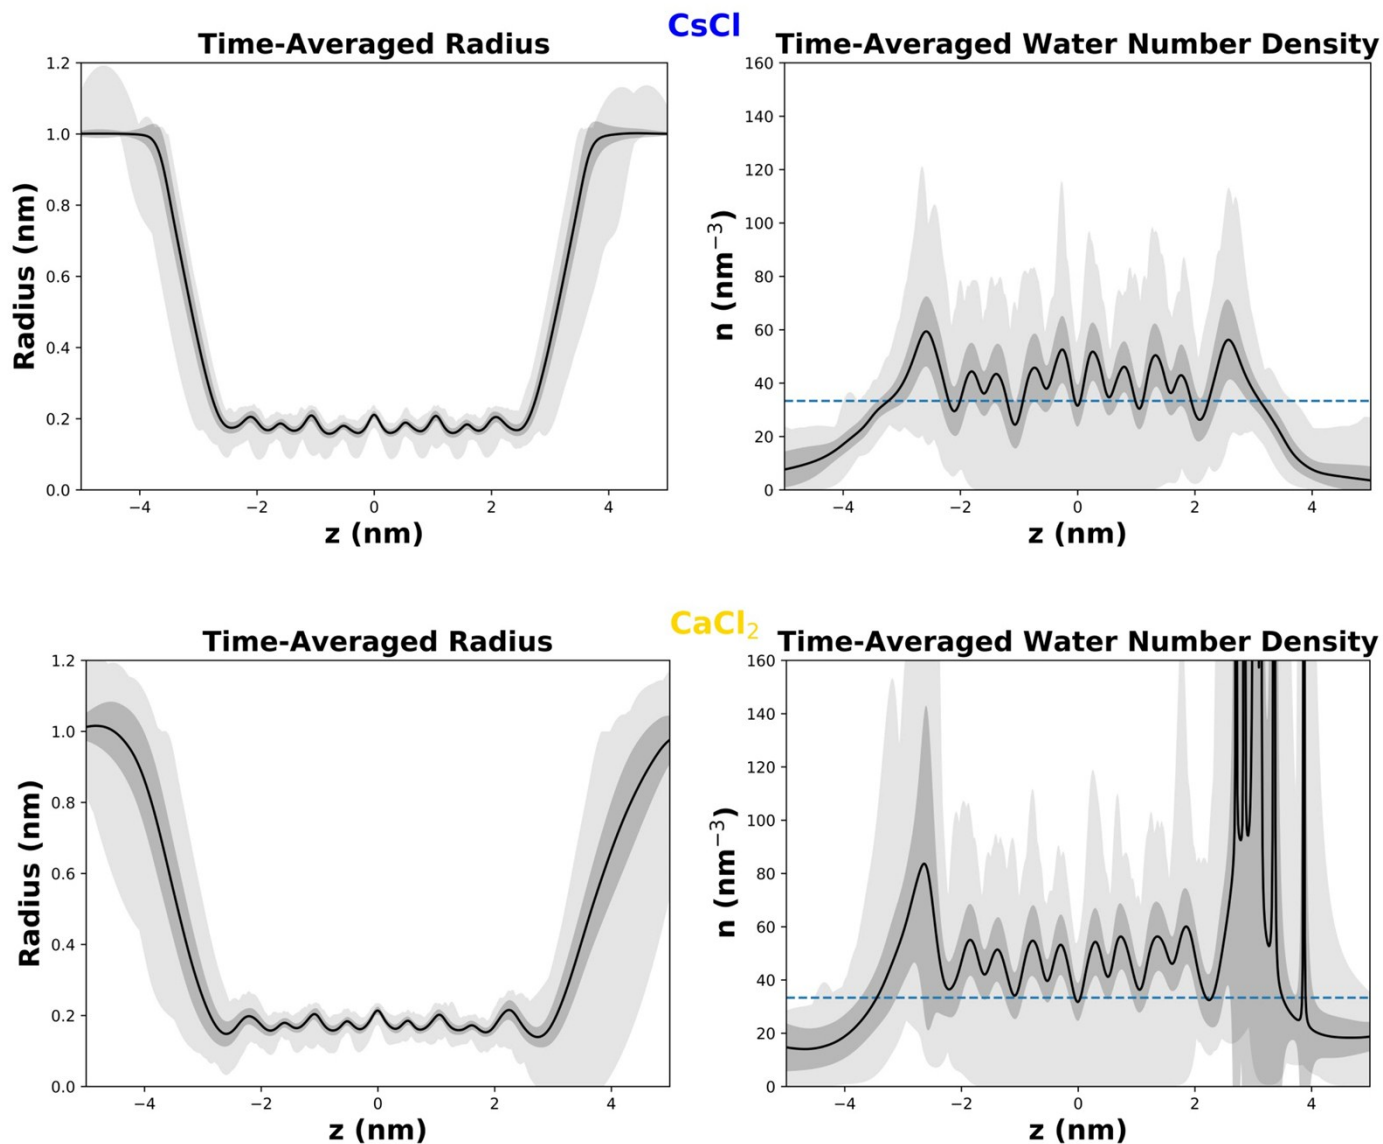

**Figure S1:** Minimum radius of SCPN<sub>4</sub>COOH (left) and 2D-density map for water inside the channels (right) for the simulations carried out in different salt concentrations, averaged from 200 ns.

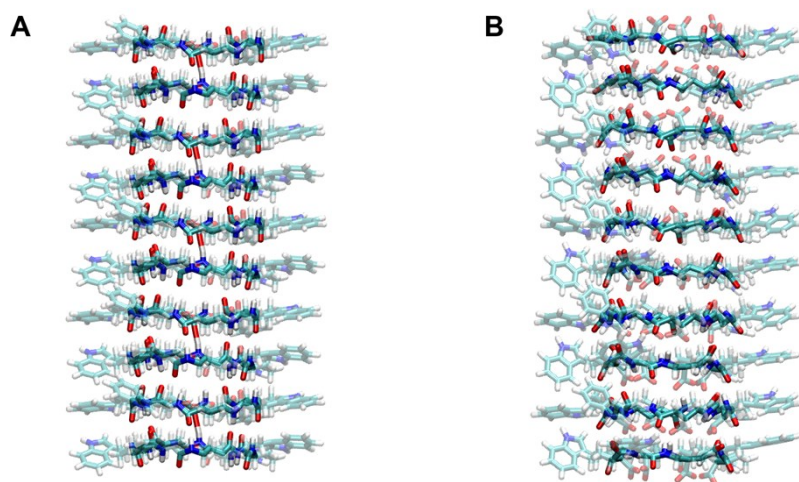

**Figure S2:** Snapshot of the initial structure of SCPN<sub>4</sub>COO<sup>-</sup> (A) and the same structure after minimization (B). It can be noticed that the H-bond network is already distorted just after the initial minimization (B).

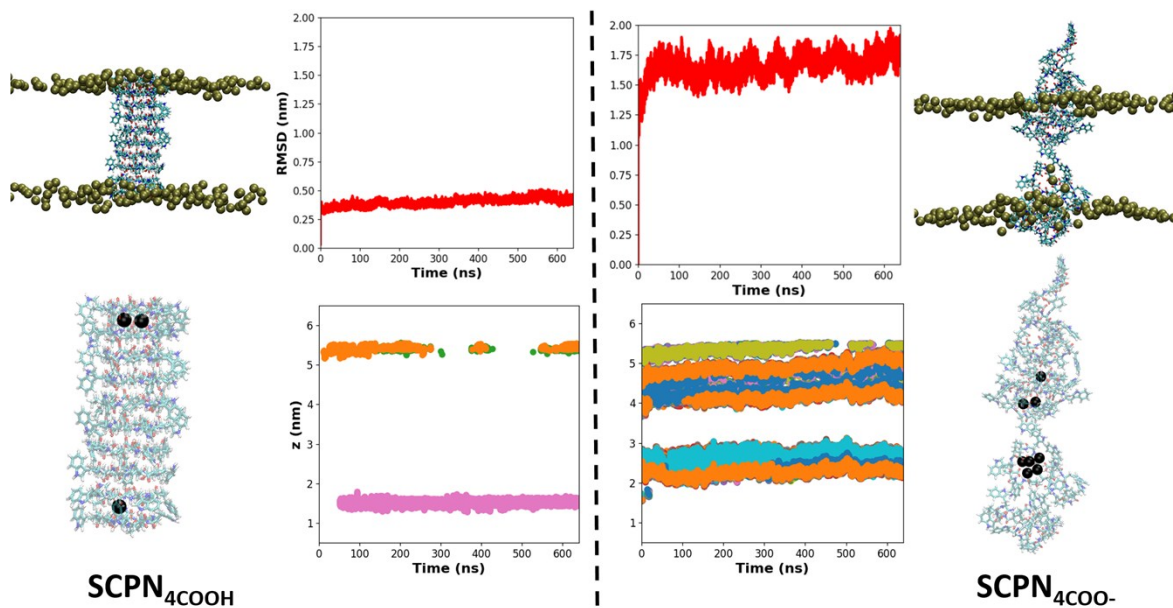

**Figure S3:** Snapshots ( $t = 640$  ns) of the two simulated  $\text{SCPN}_{4\text{COOH}}$  and  $\text{SCPN}_{4\text{COO}^-}$  in NaCl 0.5M. The graphics correspond to the RMSD for  $\text{SCPN}_{4\text{COOH}}$  and  $\text{SCPN}_{4\text{COO}^-}$  along 640 ns and considering all atoms of the SCPN (top) and to the Z-coordinate for each of the cations inside the SCPNs along the 640 ns trajectory. The nanotube z-region is comprehended between the region  $\approx 1-6$  nm. Each color corresponds to a different ion. Lipids, water and external ions have been removed for clarity. Brown spheres correspond to the phosphorous from the lipids and black circles are the corresponding ions.

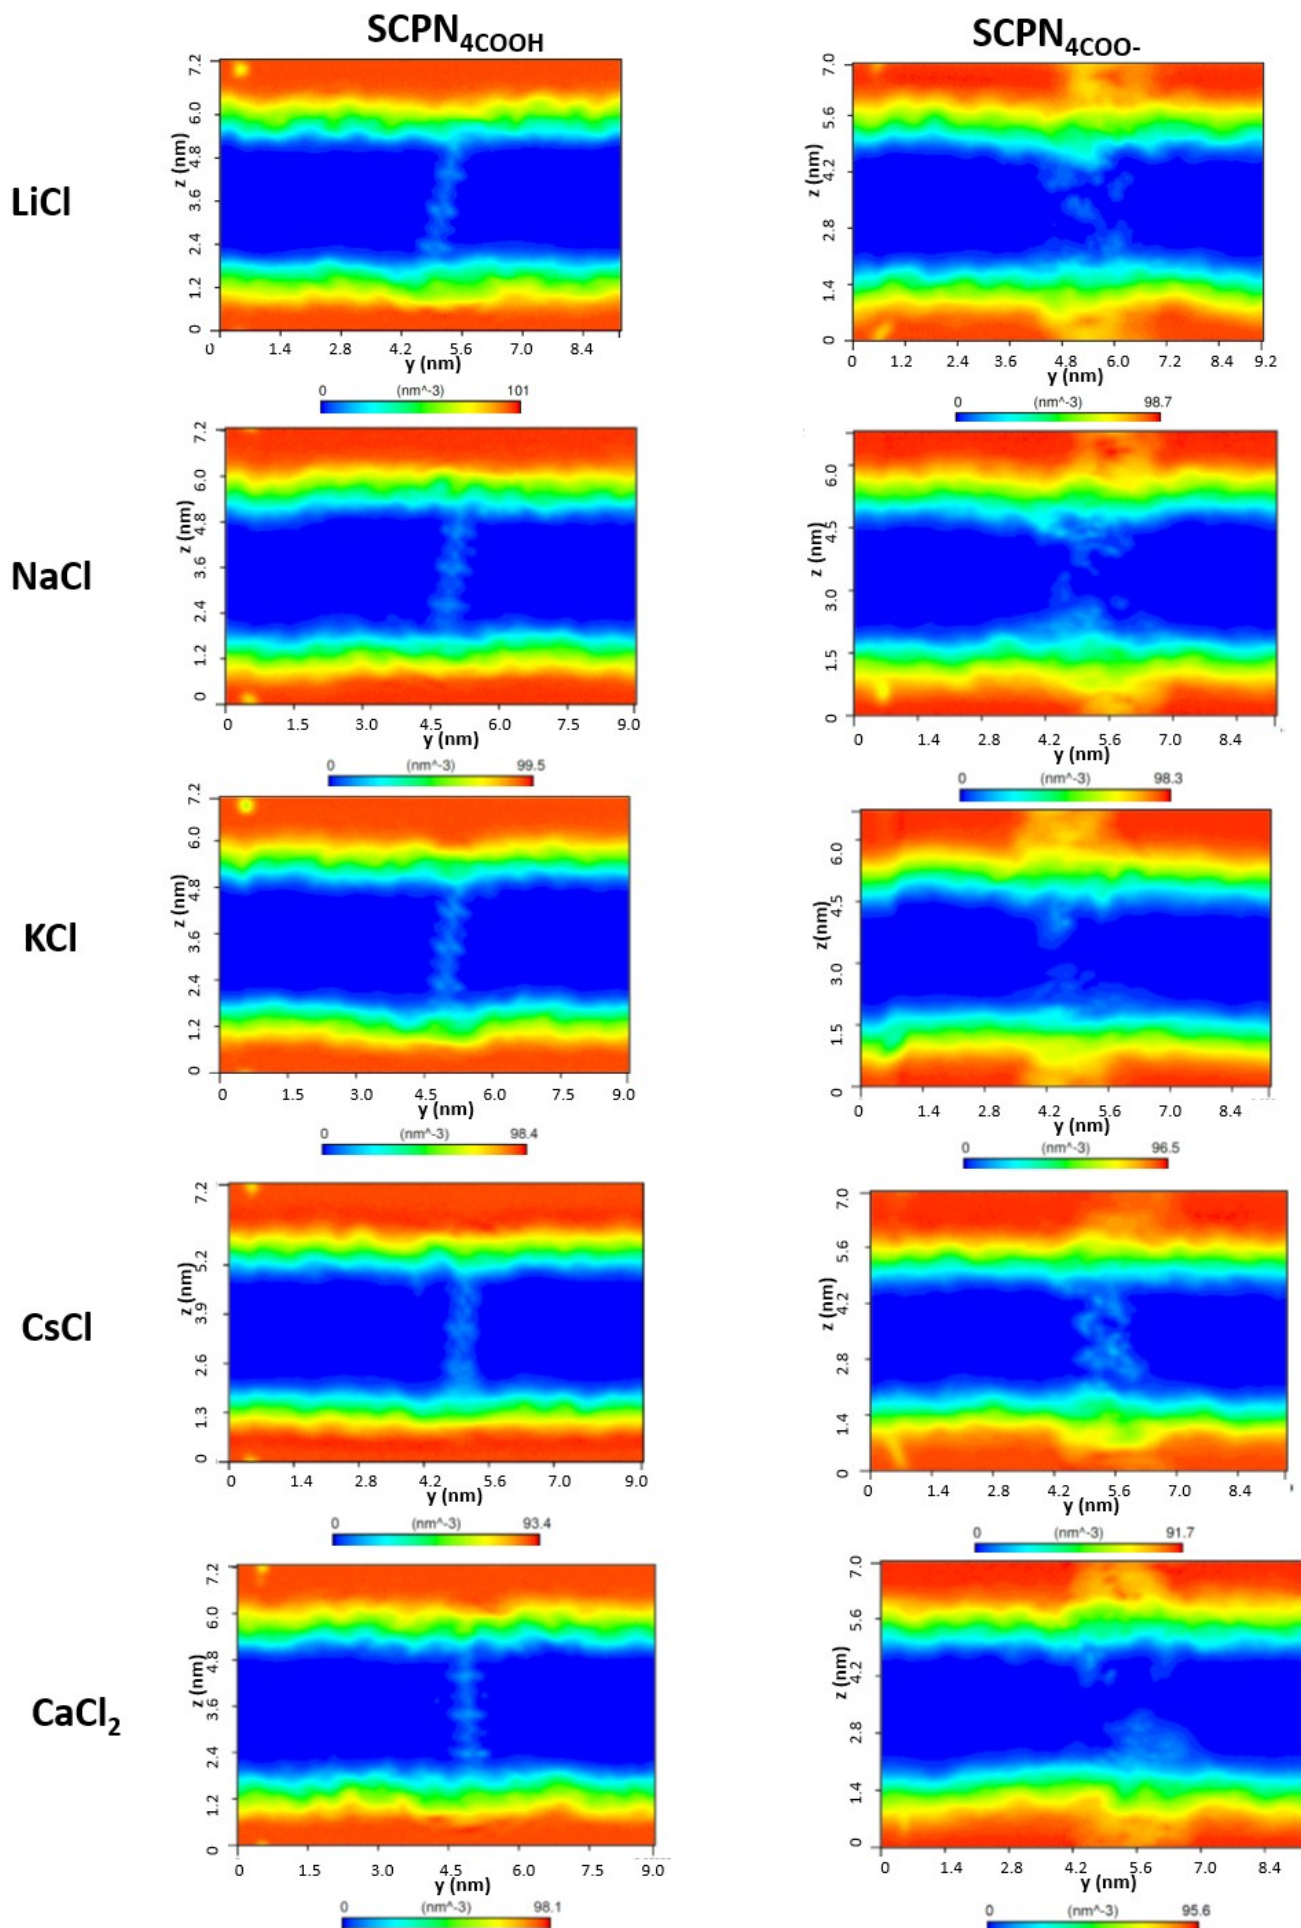

**Figure S4:** 2D-density map for water for the system  $\text{SCPN}_{4\text{COOH}}$  and  $\text{SCPN}_{4\text{COO}^-}$  simulated in different salt concentrations, averaged from 200 ns of MD simulation.

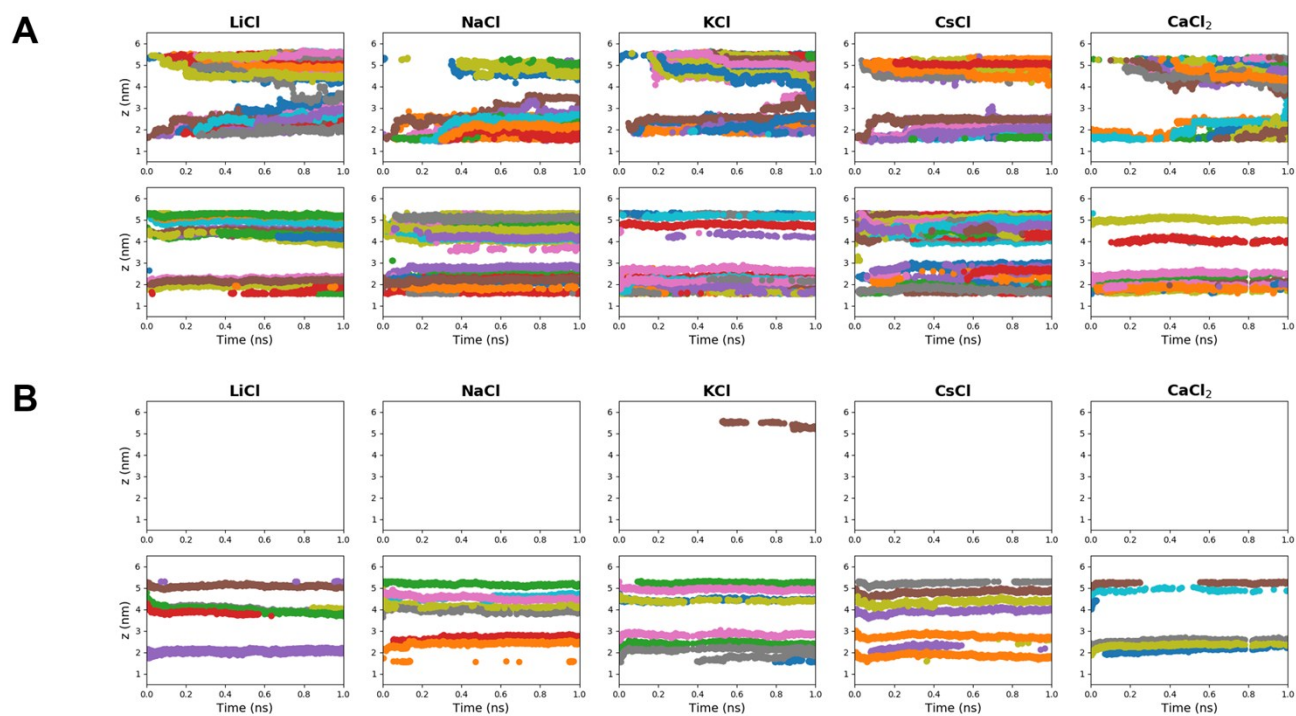

**Figure S5:** Detail of the filling of the channels with water molecules (A) and ions (B) for the protonated (top) and deprotonated (bottom) SCPNs,  $\text{SCP}_{\text{N}4\text{COOH}}$  and  $\text{SCP}_{\text{N}4\text{COO}^-}$ , respectively.

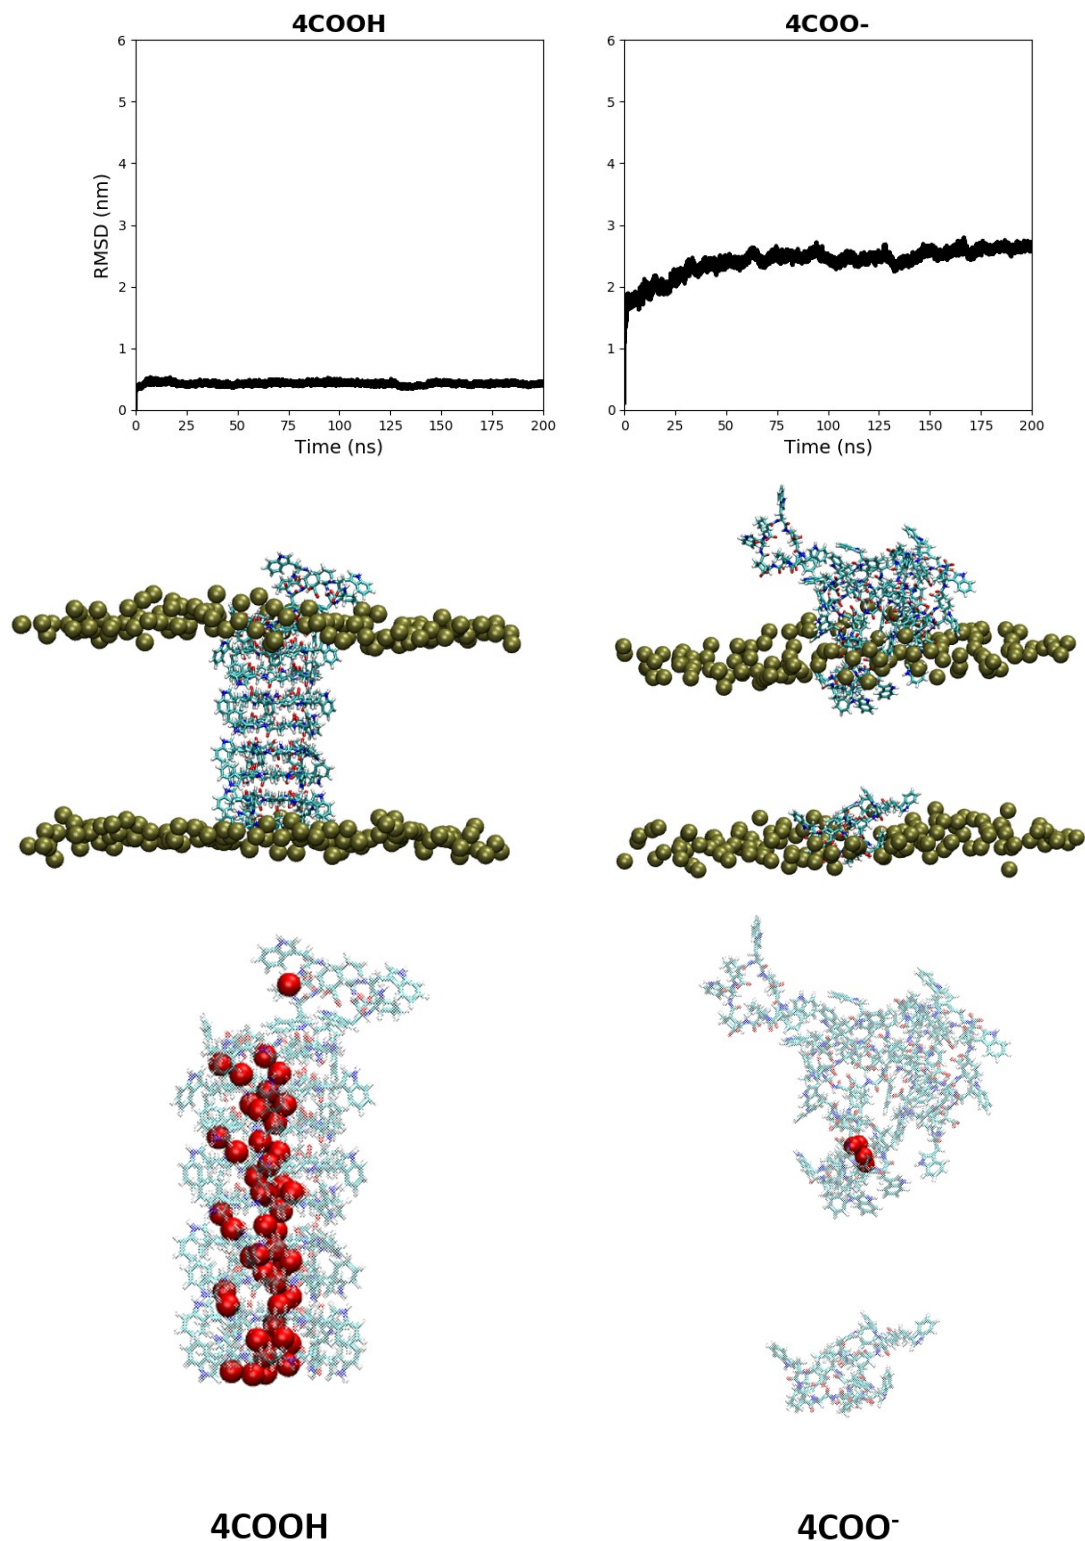

**Figure S6.** RMSD for the two derivatized nanotubes SCPN<sub>4</sub>COOH and SCPN<sub>4</sub>COO<sup>-</sup>, simulated without ions (except for the minima amount of Na<sup>+</sup> to maintain the system neutral in the case of SCPN<sub>4</sub>COO<sup>-</sup>), for 200 ns. Snapshots of the two simulated SCPN<sub>4</sub>COOH and SCPN<sub>4</sub>COO<sup>-</sup>, in these conditions after 200 ns of simulation. Lipids, water and external ions have been removed for clarity. Brown spheres correspond to the phosphorous from the lipids and red spheres correspond to the oxygen of water molecules.

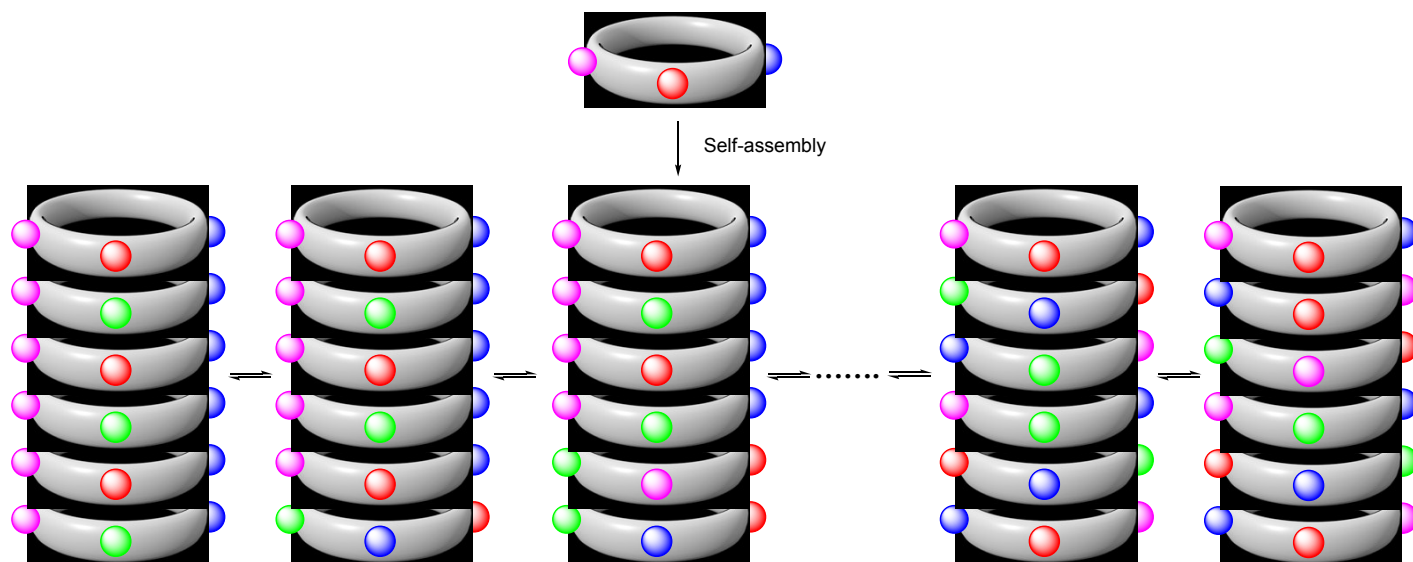

**Figure S7:** Illustration of the multiple possibilities of organization of the charged groups along the SCPN due to freedom of rotation among the CPs. For a clearer view, the charged groups are placed in the outer surface of the SCPNs.

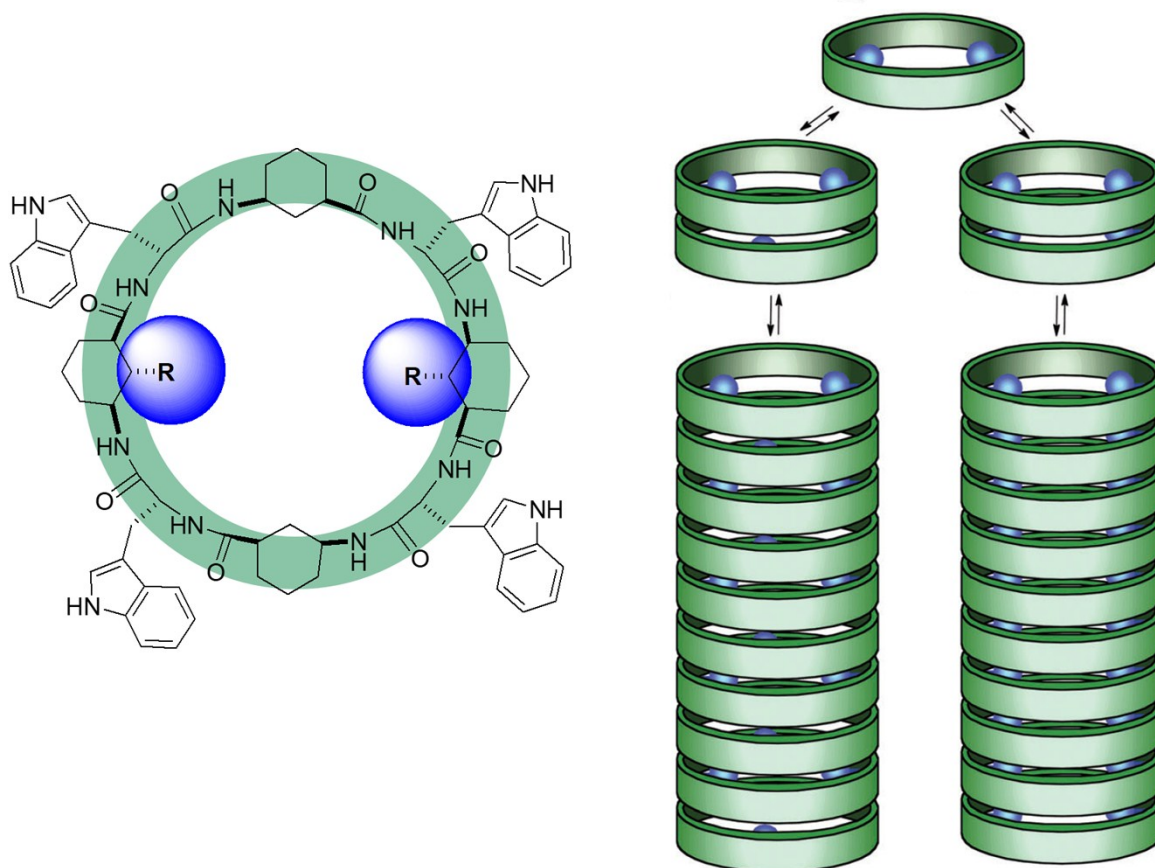

**Figure S8:** Functionalized CPs mimicking the intermediate protonated states with 2 COO<sup>-</sup> /COOH groups, SCPN<sub>2</sub>COOH and SCPN<sub>2</sub>COO<sup>-</sup>, leading to alternated or eclipsed conformation along the SCPN. R= COO<sup>-</sup> or COOH.



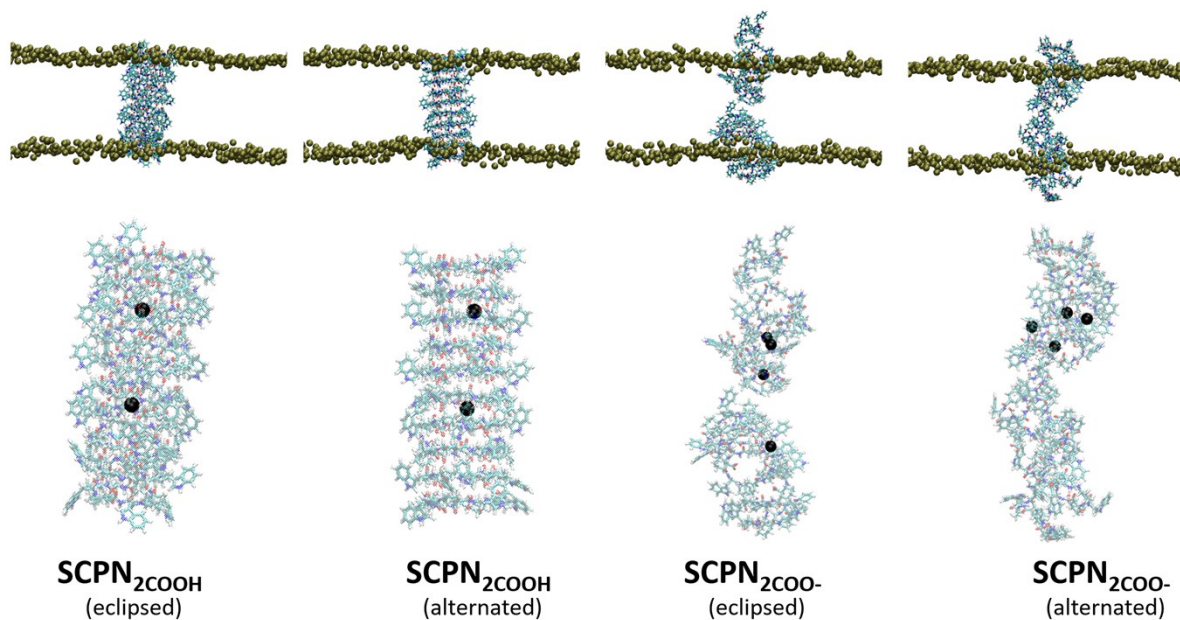

**Figure S9:** Snapshots of the four simulated SCPNs composed of CPs decorated with just 2 COOH or COO<sup>-</sup> groups, in NaCl 0.5M, after 50 ns of simulation. Lipids, water and external ions have been removed for clarity. Brown spheres correspond to the phosphorous from the lipids and black circles are the corresponding ions.

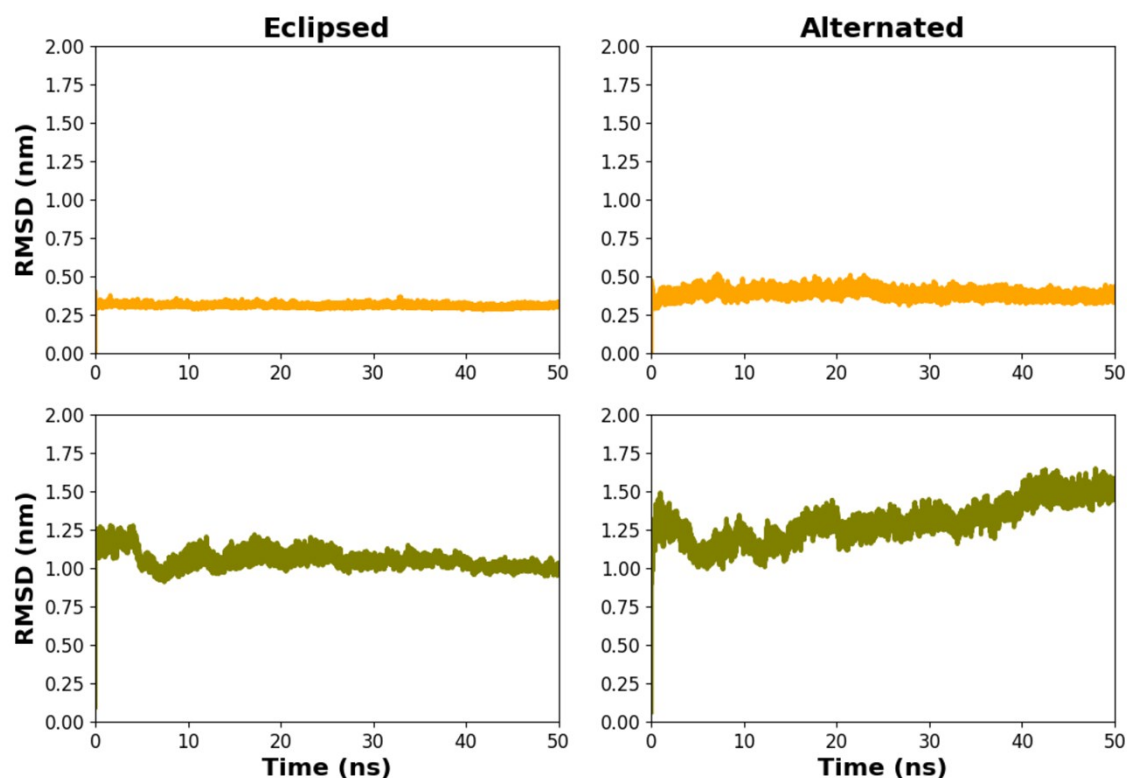

**Figure S10:** RMSD for the two nanotube models **SCPN<sub>2</sub>COOH** (top) and **SCPN<sub>2</sub>COO<sup>-</sup>** (bottom), in eclipsed or alternated conformations, simulated in NaCl 0.5M for 50 ns and considering all atoms of the SCPN.

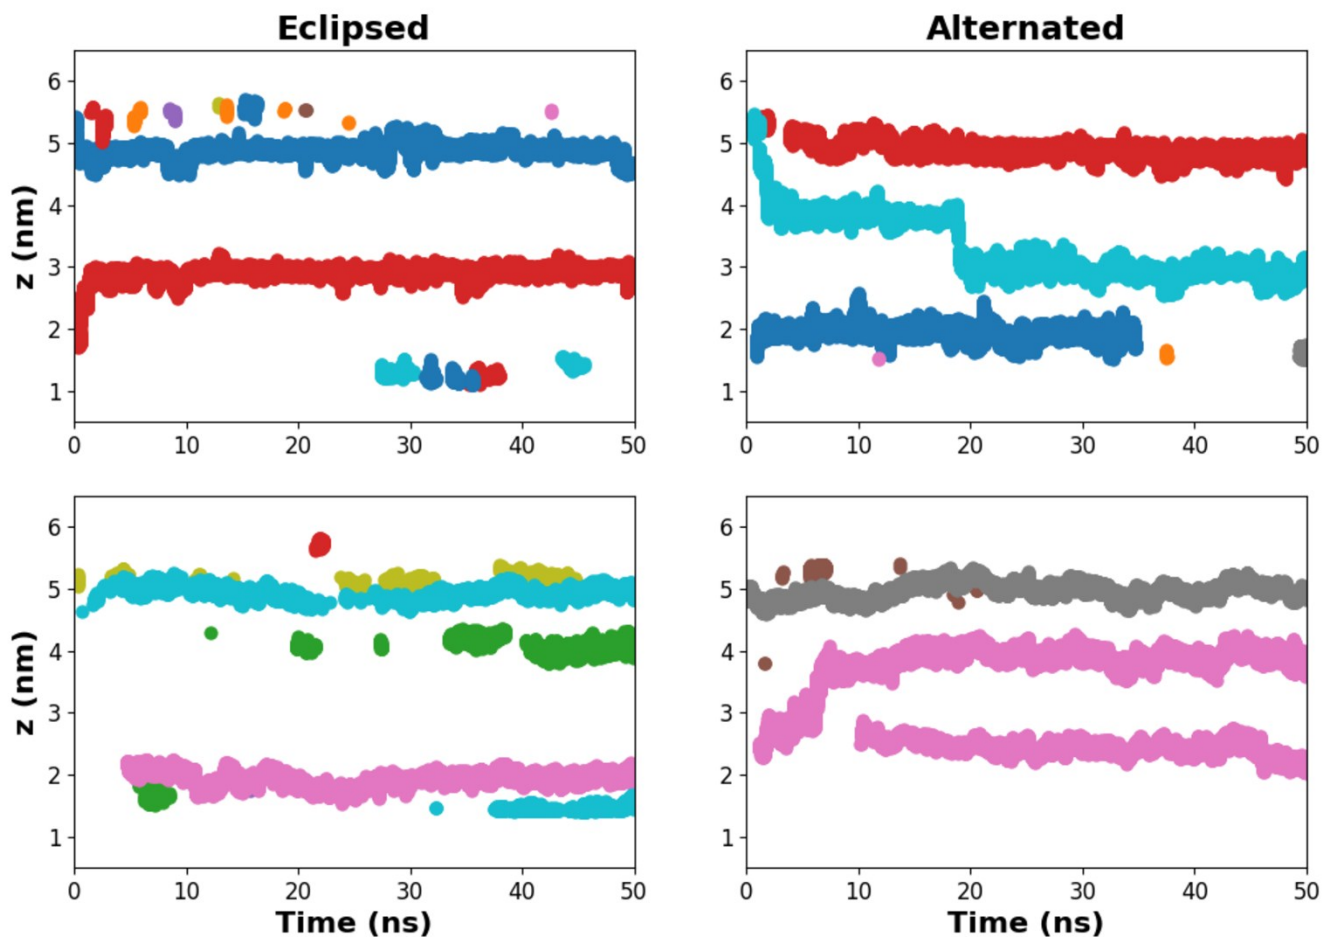

**Figure S11:** Z-coordinate for each of the cations inside the simulated peptide nanotubes  $\text{SCPN}_{2\text{COOH}}$  (top) and  $\text{SCPN}_{2\text{COO}^-}$  (bottom), in eclipsed or alternated conformations, simulated in NaCl 0.5M along the 50 ns trajectory. The nanotube z-region is comprehended between the region  $\approx 1\text{--}6$  nm. Each color corresponds to a different ion.

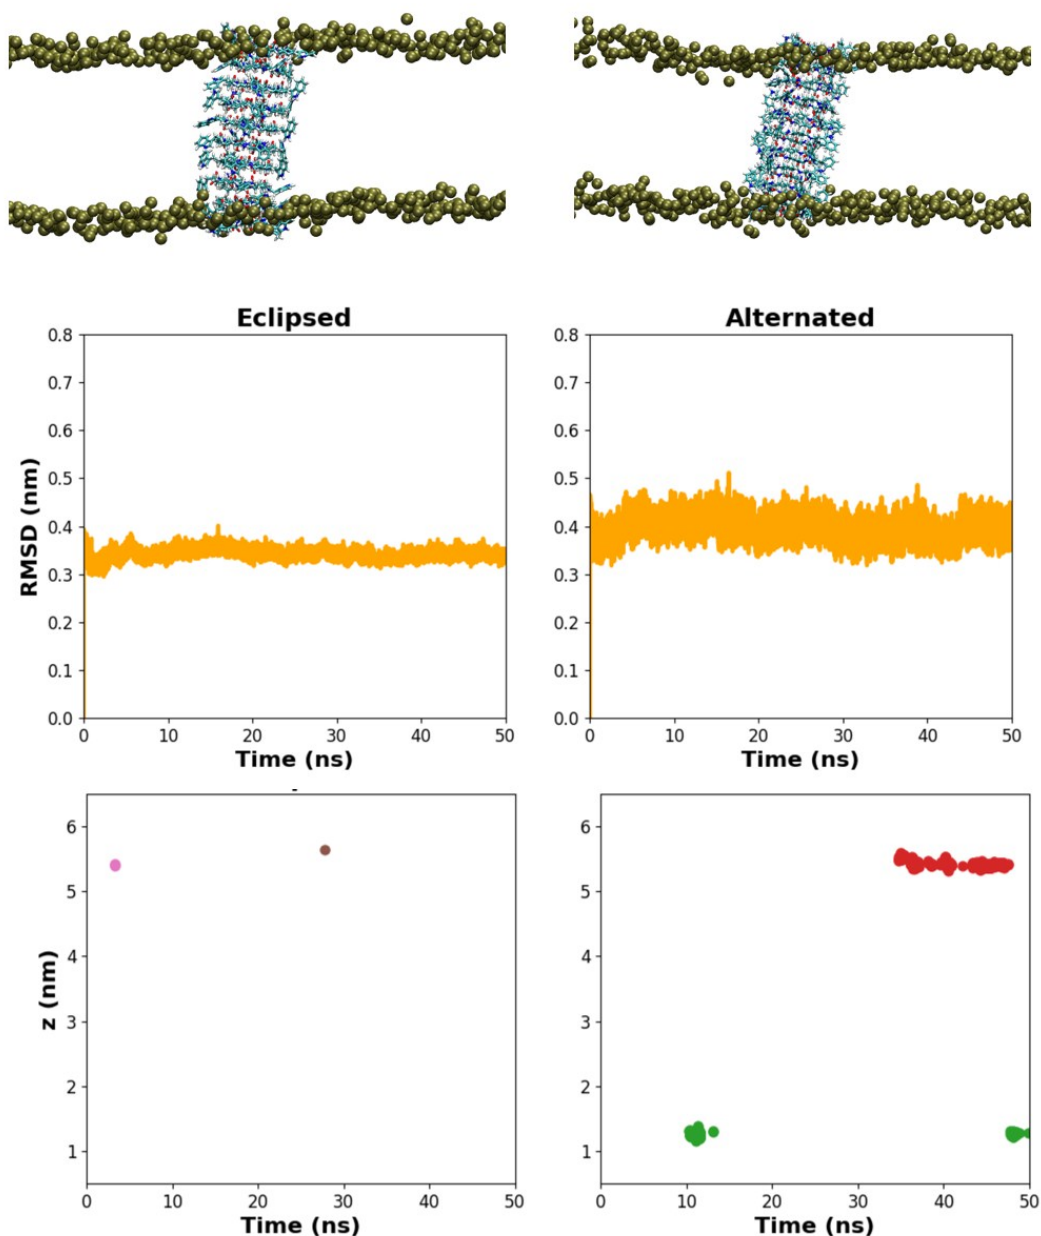

**Figure S12:** Top: Snapshots of SCPN<sub>2</sub>COOH in eclipsed or alternated conformations, simulated in CaCl<sub>2</sub> 0.5M, after 50 ns of simulation. Lipids, water and external ions have been removed for clarity. Brown spheres correspond to the phosphorous from the lipids. Medium: RMSD for those systems considering all atoms of the SCPN. Bottom: Z-coordinate for each of the cations (Ca<sup>2+</sup>) near the edges of the simulated systems. The nanotube z-region is comprehended between the region  $\approx 1-6$  nm. Each color corresponds to a different ion.

# Gromacs itp files for the cyclic peptides CP<sub>4</sub>COOH and CP<sub>4</sub>COO<sup>-</sup>:

## CP<sub>4</sub>COOH:

; minimizado\_gmx.top created by rdparm2gmx.pl Mon Dec 5 09:46:07 CET 2016

```
[ moleculetype ]
; Name          nrexcl
MOL             3

[ atoms ]
; nr      type  resnr  residue  atom  cgnr  charge      mass  typeB  chargeB
1        ca     1      MOL      C     1     -0.29205    12.000000
2        ca     1      MOL      C5    2     -0.06436    12.000000
3        ca     1      MOL      C4    3     -0.17668    12.000000
4        ca     1      MOL      C3    4     -0.22162    12.000000
5        ha     1      MOL      H76   5     0.14754     1.000000
6        ha     1      MOL      H77   6     0.12540     1.000000
7        ha     1      MOL      H78   7     0.11253     1.000000
8        ha     1      MOL      H79   8     0.14627     1.000000
9        ca     1      MOL      C1     9     0.20600    12.000000
10       na     1      MOL      N     10    -0.30656    14.000000
11       cd     1      MOL      C7    11    -0.34823    12.000000
12       h4     1      MOL      H74   12    0.17075     1.000000
13       hn     1      MOL      H75   13    0.31608     1.000000
14       ca     1      MOL      C2    14    0.10294    12.000000
15       cc     1      MOL      C6    15    0.07216    12.000000
16       c3     1      MOL      C8    16    -0.18132    12.000000
17       hc     1      MOL      H72   17    0.07163     1.000000
18       hc     1      MOL      H73   18    0.07163     1.000000
19       c3     1      MOL      C9    19    0.12366    12.000000
20       c      1      MOL      C73   20    0.60551    12.000000
21       n      1      MOL      N11   21    -0.90819    14.000000
22       c3     1      MOL      C69   22    0.65702    12.000000
23       c3     1      MOL      C68   23    0.27229    12.000000
24       c3     1      MOL      C67   24    -0.51180    12.000000
25       c      1      MOL      C66   25    0.76052    12.000000
26       n      1      MOL      N10   26    -0.60726    14.000000
27       hn     1      MOL      H10   27    0.32907     1.000000
28       o      1      MOL      O6    28    -0.56329    16.000000
29       c3     1      MOL      C72   29    -0.23375    12.000000
30       c3     1      MOL      C71   30    0.01328    12.000000
31       c3     1      MOL      C70   31    -0.10784    12.000000
32       hc     1      MOL      H5    32    0.02185     1.000000
33       hc     1      MOL      H6    33    0.02185     1.000000
34       hc     1      MOL      H3    34    0.03226     1.000000
35       hc     1      MOL      H4    35    0.03226     1.000000
36       hc     1      MOL      H1    36    0.09582     1.000000
37       hc     1      MOL      H2    37    0.09582     1.000000
38       hc     1      MOL      H9    38    0.14042     1.000000
39       hc     1      MOL      H8    39    0.01950     1.000000
40       c      1      MOL      C74   40    0.47032    12.000000
41       oh     1      MOL      O14   41    -0.59497    16.000000
42       ho     1      MOL      H83   42    0.43188     1.000000
43       o      1      MOL      O15   43    -0.48545    16.000000
44       h1     1      MOL      H7    44    -0.01554     1.000000
45       hn     1      MOL      H     45    0.35252     1.000000
46       o      1      MOL      O7    46    -0.50462    16.000000
47       h1     1      MOL      H71   47    0.10478     1.000000
48       n      1      MOL      N1    48    -0.60726    14.000000
49       hn     1      MOL      H70   49    0.32907     1.000000
50       c      1      MOL      C10   50    0.76052    12.000000
51       o      1      MOL      O     51    -0.56329    16.000000
52       c3     1      MOL      C11   52    -0.51180    12.000000
53       c3     1      MOL      C16   53    0.27229    12.000000
54       c      1      MOL      C18   54    0.47032    12.000000
55       oh     1      MOL      O12   55    -0.59497    16.000000
56       ho     1      MOL      H82   56    0.43188     1.000000
57       o      1      MOL      O13   57    -0.48545    16.000000
58       hc     1      MOL      H68   58    0.01950     1.000000
59       hc     1      MOL      H69   59    0.14042     1.000000
60       c3     1      MOL      C12   60    -0.23375    12.000000
61       hc     1      MOL      H61   61    0.09582     1.000000
62       hc     1      MOL      H62   62    0.09582     1.000000
63       c3     1      MOL      C13   63    0.01328    12.000000
64       hc     1      MOL      H63   64    0.03226     1.000000
65       hc     1      MOL      H64   65    0.03226     1.000000
66       c3     1      MOL      C14   66    -0.10784    12.000000
67       hc     1      MOL      H65   67    0.02185     1.000000
68       hc     1      MOL      H66   68    0.02185     1.000000
69       c3     1      MOL      C15   69    0.65702    12.000000
70       h1     1      MOL      H67   70    -0.01554     1.000000
71       n      1      MOL      N2    71    -0.90823    14.000000
72       hn     1      MOL      H60   72    0.35252     1.000000
73       c      1      MOL      C17   73    0.60551    12.000000
74       o      1      MOL      O1    74    -0.50462    16.000000
75       c3     1      MOL      C19   75    0.12366    12.000000
76       c3     1      MOL      C20   76    -0.18132    12.000000
77       cc     1      MOL      C21   77    0.07216    12.000000
78       cd     1      MOL      C22   78    -0.34823    12.000000
79       na     1      MOL      N3    79    -0.30656    14.000000
80       ca     1      MOL      C23   80    0.20600    12.000000
81       ca     1      MOL      C24   81    0.10294    12.000000
82       ca     1      MOL      C25   82    -0.22162    12.000000
83       ca     1      MOL      C26   83    -0.17668    12.000000
84       ca     1      MOL      C27   84    -0.06436    12.000000
85       ca     1      MOL      C28   85    -0.29205    12.000000
86       ha     1      MOL      H51   86    0.14627     1.000000
87       ha     1      MOL      H52   87    0.11253     1.000000
88       ha     1      MOL      H53   88    0.12540     1.000000
89       ha     1      MOL      H54   89    0.14754     1.000000
90       hn     1      MOL      H55   90    0.31608     1.000000
91       h4     1      MOL      H56   91    0.17075     1.000000
92       hc     1      MOL      H57   92    0.07163     1.000000
93       hc     1      MOL      H58   93    0.07163     1.000000
94       h1     1      MOL      H59   94    0.10478     1.000000
```

|     |    |   |     |     |     |          |           |
|-----|----|---|-----|-----|-----|----------|-----------|
| 95  | n  | 1 | MOL | N4  | 95  | -0.60726 | 14.000000 |
| 96  | hn | 1 | MOL | H50 | 96  | 0.32907  | 1.000000  |
| 97  | c  | 1 | MOL | C29 | 97  | 0.76052  | 12.000000 |
| 98  | o  | 1 | MOL | O2  | 98  | -0.56329 | 16.000000 |
| 99  | c3 | 1 | MOL | C30 | 99  | -0.51180 | 12.000000 |
| 100 | c3 | 1 | MOL | C35 | 100 | 0.27229  | 12.000000 |
| 101 | c  | 1 | MOL | C75 | 101 | 0.47032  | 12.000000 |
| 102 | oh | 1 | MOL | O10 | 102 | -0.59497 | 16.000000 |
| 103 | ho | 1 | MOL | H81 | 103 | 0.43188  | 1.000000  |
| 104 | o  | 1 | MOL | O11 | 104 | -0.48545 | 16.000000 |
| 105 | hc | 1 | MOL | H48 | 105 | 0.01950  | 1.000000  |
| 106 | hc | 1 | MOL | H49 | 106 | 0.14042  | 1.000000  |
| 107 | c3 | 1 | MOL | C31 | 107 | -0.23375 | 12.000000 |
| 108 | hc | 1 | MOL | H41 | 108 | 0.09582  | 1.000000  |
| 109 | hc | 1 | MOL | H42 | 109 | 0.09582  | 1.000000  |
| 110 | c3 | 1 | MOL | C32 | 110 | 0.01328  | 12.000000 |
| 111 | hc | 1 | MOL | H43 | 111 | 0.03226  | 1.000000  |
| 112 | hc | 1 | MOL | H44 | 112 | 0.03226  | 1.000000  |
| 113 | c3 | 1 | MOL | C33 | 113 | -0.10784 | 12.000000 |
| 114 | hc | 1 | MOL | H45 | 114 | 0.02185  | 1.000000  |
| 115 | hc | 1 | MOL | H46 | 115 | 0.02185  | 1.000000  |
| 116 | c3 | 1 | MOL | C34 | 116 | 0.65702  | 12.000000 |
| 117 | h1 | 1 | MOL | H47 | 117 | -0.01554 | 1.000000  |
| 118 | n  | 1 | MOL | N5  | 118 | -0.90823 | 14.000000 |
| 119 | hn | 1 | MOL | H40 | 119 | 0.35252  | 1.000000  |
| 120 | c  | 1 | MOL | C36 | 120 | 0.60551  | 12.000000 |
| 121 | o  | 1 | MOL | O3  | 121 | -0.50462 | 16.000000 |
| 122 | c3 | 1 | MOL | C37 | 122 | 0.12366  | 12.000000 |
| 123 | c3 | 1 | MOL | C38 | 123 | -0.18132 | 12.000000 |
| 124 | cc | 1 | MOL | C39 | 124 | 0.07216  | 12.000000 |
| 125 | cd | 1 | MOL | C40 | 125 | -0.34823 | 12.000000 |
| 126 | na | 1 | MOL | N6  | 126 | -0.30656 | 14.000000 |
| 127 | ca | 1 | MOL | C41 | 127 | 0.20600  | 12.000000 |
| 128 | ca | 1 | MOL | C42 | 128 | 0.10294  | 12.000000 |
| 129 | ca | 1 | MOL | C43 | 129 | -0.22162 | 12.000000 |
| 130 | ca | 1 | MOL | C44 | 130 | -0.17668 | 12.000000 |
| 131 | ca | 1 | MOL | C45 | 131 | -0.06436 | 12.000000 |
| 132 | ca | 1 | MOL | C46 | 132 | -0.29205 | 12.000000 |
| 133 | ha | 1 | MOL | H31 | 133 | 0.14627  | 1.000000  |
| 134 | ha | 1 | MOL | H32 | 134 | 0.11253  | 1.000000  |
| 135 | ha | 1 | MOL | H33 | 135 | 0.12540  | 1.000000  |
| 136 | ha | 1 | MOL | H34 | 136 | 0.14754  | 1.000000  |
| 137 | hn | 1 | MOL | H35 | 137 | 0.31608  | 1.000000  |
| 138 | h4 | 1 | MOL | H36 | 138 | 0.17075  | 1.000000  |
| 139 | hc | 1 | MOL | H37 | 139 | 0.07163  | 1.000000  |
| 140 | hc | 1 | MOL | H38 | 140 | 0.07163  | 1.000000  |
| 141 | h1 | 1 | MOL | H39 | 141 | 0.10478  | 1.000000  |
| 142 | n  | 1 | MOL | N7  | 142 | -0.60726 | 14.000000 |
| 143 | hn | 1 | MOL | H30 | 143 | 0.32907  | 1.000000  |
| 144 | c  | 1 | MOL | C47 | 144 | 0.76052  | 12.000000 |
| 145 | o  | 1 | MOL | O4  | 145 | -0.56329 | 16.000000 |
| 146 | c3 | 1 | MOL | C48 | 146 | -0.51180 | 12.000000 |
| 147 | c3 | 1 | MOL | C53 | 147 | 0.27229  | 12.000000 |
| 148 | c  | 1 | MOL | C55 | 148 | 0.47032  | 12.000000 |
| 149 | oh | 1 | MOL | O8  | 149 | -0.59497 | 16.000000 |
| 150 | ho | 1 | MOL | H80 | 150 | 0.43188  | 1.000000  |
| 151 | o  | 1 | MOL | O9  | 151 | -0.48545 | 16.000000 |
| 152 | hc | 1 | MOL | H28 | 152 | 0.01950  | 1.000000  |
| 153 | hc | 1 | MOL | H29 | 153 | 0.14042  | 1.000000  |
| 154 | c3 | 1 | MOL | C49 | 154 | -0.23375 | 12.000000 |
| 155 | hc | 1 | MOL | H21 | 155 | 0.09582  | 1.000000  |
| 156 | hc | 1 | MOL | H22 | 156 | 0.09582  | 1.000000  |
| 157 | c3 | 1 | MOL | C50 | 157 | 0.01328  | 12.000000 |
| 158 | hc | 1 | MOL | H23 | 158 | 0.03226  | 1.000000  |
| 159 | hc | 1 | MOL | H24 | 159 | 0.03226  | 1.000000  |
| 160 | c3 | 1 | MOL | C51 | 160 | -0.10784 | 12.000000 |
| 161 | hc | 1 | MOL | H25 | 161 | 0.02185  | 1.000000  |
| 162 | hc | 1 | MOL | H26 | 162 | 0.02185  | 1.000000  |
| 163 | c3 | 1 | MOL | C52 | 163 | 0.65702  | 12.000000 |
| 164 | h1 | 1 | MOL | H27 | 164 | -0.01554 | 1.000000  |
| 165 | n  | 1 | MOL | N8  | 165 | -0.90823 | 14.000000 |
| 166 | hn | 1 | MOL | H20 | 166 | 0.35252  | 1.000000  |
| 167 | c  | 1 | MOL | C54 | 167 | 0.60551  | 12.000000 |
| 168 | o  | 1 | MOL | O5  | 168 | -0.50462 | 16.000000 |
| 169 | c3 | 1 | MOL | C56 | 169 | 0.12366  | 12.000000 |
| 170 | h1 | 1 | MOL | H19 | 170 | 0.10478  | 1.000000  |
| 171 | c3 | 1 | MOL | C57 | 171 | -0.18132 | 12.000000 |
| 172 | hc | 1 | MOL | H17 | 172 | 0.07163  | 1.000000  |
| 173 | hc | 1 | MOL | H18 | 173 | 0.07163  | 1.000000  |
| 174 | cc | 1 | MOL | C58 | 174 | 0.07216  | 12.000000 |
| 175 | cd | 1 | MOL | C59 | 175 | -0.34823 | 12.000000 |
| 176 | h4 | 1 | MOL | H16 | 176 | 0.17075  | 1.000000  |
| 177 | na | 1 | MOL | N9  | 177 | -0.30656 | 14.000000 |
| 178 | hn | 1 | MOL | H15 | 178 | 0.31608  | 1.000000  |
| 179 | ca | 1 | MOL | C60 | 179 | 0.20600  | 12.000000 |
| 180 | ca | 1 | MOL | C61 | 180 | 0.10294  | 12.000000 |
| 181 | ca | 1 | MOL | C62 | 181 | -0.22162 | 12.000000 |
| 182 | ha | 1 | MOL | H14 | 182 | 0.14754  | 1.000000  |
| 183 | ca | 1 | MOL | C63 | 183 | -0.17668 | 12.000000 |
| 184 | ha | 1 | MOL | H13 | 184 | 0.12540  | 1.000000  |
| 185 | ca | 1 | MOL | C64 | 185 | -0.06436 | 12.000000 |
| 186 | ha | 1 | MOL | H12 | 186 | 0.11253  | 1.000000  |
| 187 | ca | 1 | MOL | C65 | 187 | -0.29205 | 12.000000 |
| 188 | ha | 1 | MOL | H11 | 188 | 0.14627  | 1.000000  |

[ bonds ]

|    | ai | aj | funct      | r          | k |
|----|----|----|------------|------------|---|
| 1  | 8  | 1  | 1.0870e-01 | 2.8811e+05 |   |
| 2  | 7  | 1  | 1.0870e-01 | 2.8811e+05 |   |
| 3  | 6  | 1  | 1.0870e-01 | 2.8811e+05 |   |
| 4  | 5  | 1  | 1.0870e-01 | 2.8811e+05 |   |
| 10 | 13 | 1  | 1.0110e-01 | 3.4024e+05 |   |
| 11 | 12 | 1  | 1.0830e-01 | 2.9296e+05 |   |
| 16 | 17 | 1  | 1.0920e-01 | 2.8225e+05 |   |
| 16 | 18 | 1  | 1.0920e-01 | 2.8225e+05 |   |
| 19 | 47 | 1  | 1.0930e-01 | 2.8108e+05 |   |
| 21 | 45 | 1  | 1.0090e-01 | 3.4326e+05 |   |
| 22 | 44 | 1  | 1.0930e-01 | 2.8108e+05 |   |
| 23 | 39 | 1  | 1.0920e-01 | 2.8225e+05 |   |
| 24 | 38 | 1  | 1.0920e-01 | 2.8225e+05 |   |
| 26 | 27 | 1  | 1.0090e-01 | 3.4326e+05 |   |
| 29 | 36 | 1  | 1.0920e-01 | 2.8225e+05 |   |
| 29 | 37 | 1  | 1.0920e-01 | 2.8225e+05 |   |

|     |     |   |            |            |
|-----|-----|---|------------|------------|
| 30  | 34  | 1 | 1.0920e-01 | 2.8225e+05 |
| 30  | 35  | 1 | 1.0920e-01 | 2.8225e+05 |
| 31  | 32  | 1 | 1.0920e-01 | 2.8225e+05 |
| 31  | 33  | 1 | 1.0920e-01 | 2.8225e+05 |
| 41  | 42  | 1 | 9.7400e-02 | 3.0928e+05 |
| 48  | 49  | 1 | 1.0090e-01 | 3.4326e+05 |
| 52  | 59  | 1 | 1.0920e-01 | 2.8225e+05 |
| 53  | 58  | 1 | 1.0920e-01 | 2.8225e+05 |
| 55  | 56  | 1 | 9.7400e-02 | 3.0928e+05 |
| 60  | 61  | 1 | 1.0920e-01 | 2.8225e+05 |
| 60  | 62  | 1 | 1.0920e-01 | 2.8225e+05 |
| 63  | 64  | 1 | 1.0920e-01 | 2.8225e+05 |
| 63  | 65  | 1 | 1.0920e-01 | 2.8225e+05 |
| 66  | 67  | 1 | 1.0920e-01 | 2.8225e+05 |
| 66  | 68  | 1 | 1.0920e-01 | 2.8225e+05 |
| 69  | 70  | 1 | 1.0930e-01 | 2.8108e+05 |
| 71  | 72  | 1 | 1.0090e-01 | 3.4326e+05 |
| 75  | 94  | 1 | 1.0930e-01 | 2.8108e+05 |
| 76  | 92  | 1 | 1.0920e-01 | 2.8225e+05 |
| 76  | 93  | 1 | 1.0920e-01 | 2.8225e+05 |
| 78  | 91  | 1 | 1.0830e-01 | 2.9296e+05 |
| 79  | 90  | 1 | 1.0110e-01 | 3.4024e+05 |
| 82  | 89  | 1 | 1.0870e-01 | 2.8811e+05 |
| 83  | 88  | 1 | 1.0870e-01 | 2.8811e+05 |
| 84  | 87  | 1 | 1.0870e-01 | 2.8811e+05 |
| 85  | 86  | 1 | 1.0870e-01 | 2.8811e+05 |
| 95  | 96  | 1 | 1.0090e-01 | 3.4326e+05 |
| 99  | 106 | 1 | 1.0920e-01 | 2.8225e+05 |
| 100 | 105 | 1 | 1.0920e-01 | 2.8225e+05 |
| 102 | 103 | 1 | 9.7400e-02 | 3.0928e+05 |
| 107 | 108 | 1 | 1.0920e-01 | 2.8225e+05 |
| 107 | 109 | 1 | 1.0920e-01 | 2.8225e+05 |
| 110 | 111 | 1 | 1.0920e-01 | 2.8225e+05 |
| 110 | 112 | 1 | 1.0920e-01 | 2.8225e+05 |
| 113 | 114 | 1 | 1.0920e-01 | 2.8225e+05 |
| 113 | 115 | 1 | 1.0920e-01 | 2.8225e+05 |
| 116 | 117 | 1 | 1.0930e-01 | 2.8108e+05 |
| 118 | 119 | 1 | 1.0090e-01 | 3.4326e+05 |
| 122 | 141 | 1 | 1.0930e-01 | 2.8108e+05 |
| 123 | 139 | 1 | 1.0920e-01 | 2.8225e+05 |
| 123 | 140 | 1 | 1.0920e-01 | 2.8225e+05 |
| 125 | 138 | 1 | 1.0830e-01 | 2.9296e+05 |
| 126 | 137 | 1 | 1.0110e-01 | 3.4024e+05 |
| 129 | 136 | 1 | 1.0870e-01 | 2.8811e+05 |
| 130 | 135 | 1 | 1.0870e-01 | 2.8811e+05 |
| 131 | 134 | 1 | 1.0870e-01 | 2.8811e+05 |
| 132 | 133 | 1 | 1.0870e-01 | 2.8811e+05 |
| 142 | 143 | 1 | 1.0090e-01 | 3.4326e+05 |
| 146 | 153 | 1 | 1.0920e-01 | 2.8225e+05 |
| 147 | 152 | 1 | 1.0920e-01 | 2.8225e+05 |
| 149 | 150 | 1 | 9.7400e-02 | 3.0928e+05 |
| 154 | 155 | 1 | 1.0920e-01 | 2.8225e+05 |
| 154 | 156 | 1 | 1.0920e-01 | 2.8225e+05 |
| 157 | 158 | 1 | 1.0920e-01 | 2.8225e+05 |
| 157 | 159 | 1 | 1.0920e-01 | 2.8225e+05 |
| 160 | 161 | 1 | 1.0920e-01 | 2.8225e+05 |
| 160 | 162 | 1 | 1.0920e-01 | 2.8225e+05 |
| 163 | 164 | 1 | 1.0930e-01 | 2.8108e+05 |
| 165 | 166 | 1 | 1.0090e-01 | 3.4326e+05 |
| 169 | 170 | 1 | 1.0930e-01 | 2.8108e+05 |
| 171 | 172 | 1 | 1.0920e-01 | 2.8225e+05 |
| 171 | 173 | 1 | 1.0920e-01 | 2.8225e+05 |
| 175 | 176 | 1 | 1.0830e-01 | 2.9296e+05 |
| 177 | 178 | 1 | 1.0110e-01 | 3.4024e+05 |
| 181 | 182 | 1 | 1.0870e-01 | 2.8811e+05 |
| 183 | 184 | 1 | 1.0870e-01 | 2.8811e+05 |
| 185 | 186 | 1 | 1.0870e-01 | 2.8811e+05 |
| 187 | 188 | 1 | 1.0870e-01 | 2.8811e+05 |
| 1   | 2   | 1 | 1.3870e-01 | 4.0033e+05 |
| 1   | 9   | 1 | 1.3870e-01 | 4.0033e+05 |
| 2   | 3   | 1 | 1.3870e-01 | 4.0033e+05 |
| 3   | 4   | 1 | 1.3870e-01 | 4.0033e+05 |
| 4   | 14  | 1 | 1.3870e-01 | 4.0033e+05 |
| 9   | 10  | 1 | 1.3500e-01 | 3.9355e+05 |
| 9   | 14  | 1 | 1.3870e-01 | 4.0033e+05 |
| 10  | 11  | 1 | 1.3710e-01 | 3.6719e+05 |
| 11  | 15  | 1 | 1.3710e-01 | 4.2175e+05 |
| 14  | 15  | 1 | 1.4340e-01 | 3.4451e+05 |
| 15  | 16  | 1 | 1.4990e-01 | 2.8225e+05 |
| 16  | 19  | 1 | 1.5350e-01 | 2.5363e+05 |
| 19  | 20  | 1 | 1.5080e-01 | 2.7472e+05 |
| 19  | 48  | 1 | 1.4600e-01 | 2.7665e+05 |
| 20  | 21  | 1 | 1.3450e-01 | 4.0016e+05 |
| 20  | 46  | 1 | 1.2140e-01 | 5.4225e+05 |
| 21  | 22  | 1 | 1.4600e-01 | 2.7665e+05 |
| 22  | 23  | 1 | 1.5350e-01 | 2.5363e+05 |
| 22  | 31  | 1 | 1.5350e-01 | 2.5363e+05 |
| 23  | 24  | 1 | 1.5350e-01 | 2.5363e+05 |
| 23  | 40  | 1 | 1.5080e-01 | 2.7472e+05 |
| 24  | 25  | 1 | 1.5080e-01 | 2.7472e+05 |
| 24  | 29  | 1 | 1.5350e-01 | 2.5363e+05 |
| 25  | 26  | 1 | 1.3450e-01 | 4.0016e+05 |
| 25  | 28  | 1 | 1.2140e-01 | 5.4225e+05 |
| 26  | 169 | 1 | 1.4600e-01 | 2.7665e+05 |
| 29  | 30  | 1 | 1.5350e-01 | 2.5363e+05 |
| 30  | 31  | 1 | 1.5350e-01 | 2.5363e+05 |
| 40  | 41  | 1 | 1.3060e-01 | 3.9028e+05 |
| 40  | 43  | 1 | 1.2140e-01 | 5.4225e+05 |
| 48  | 50  | 1 | 1.3450e-01 | 4.0016e+05 |
| 50  | 51  | 1 | 1.2140e-01 | 5.4225e+05 |
| 50  | 52  | 1 | 1.5080e-01 | 2.7472e+05 |
| 52  | 53  | 1 | 1.5350e-01 | 2.5363e+05 |
| 52  | 60  | 1 | 1.5350e-01 | 2.5363e+05 |
| 53  | 54  | 1 | 1.5080e-01 | 2.7472e+05 |
| 53  | 69  | 1 | 1.5350e-01 | 2.5363e+05 |
| 54  | 55  | 1 | 1.3060e-01 | 3.9028e+05 |
| 54  | 57  | 1 | 1.2140e-01 | 5.4225e+05 |
| 60  | 63  | 1 | 1.5350e-01 | 2.5363e+05 |
| 63  | 66  | 1 | 1.5350e-01 | 2.5363e+05 |
| 66  | 69  | 1 | 1.5350e-01 | 2.5363e+05 |
| 69  | 71  | 1 | 1.4600e-01 | 2.7665e+05 |
| 71  | 73  | 1 | 1.3450e-01 | 4.0016e+05 |
| 73  | 74  | 1 | 1.2140e-01 | 5.4225e+05 |

|     |     |   |            |            |
|-----|-----|---|------------|------------|
| 73  | 75  | 1 | 1.5080e-01 | 2.7472e+05 |
| 75  | 76  | 1 | 1.5350e-01 | 2.5363e+05 |
| 75  | 95  | 1 | 1.4600e-01 | 2.7665e+05 |
| 76  | 77  | 1 | 1.4990e-01 | 2.8225e+05 |
| 77  | 78  | 1 | 1.3710e-01 | 4.2175e+05 |
| 77  | 81  | 1 | 1.4340e-01 | 3.4451e+05 |
| 78  | 79  | 1 | 1.3710e-01 | 3.6719e+05 |
| 79  | 80  | 1 | 1.3500e-01 | 3.9355e+05 |
| 80  | 81  | 1 | 1.3870e-01 | 4.0033e+05 |
| 80  | 85  | 1 | 1.3870e-01 | 4.0033e+05 |
| 81  | 82  | 1 | 1.3870e-01 | 4.0033e+05 |
| 82  | 83  | 1 | 1.3870e-01 | 4.0033e+05 |
| 83  | 84  | 1 | 1.3870e-01 | 4.0033e+05 |
| 84  | 85  | 1 | 1.3870e-01 | 4.0033e+05 |
| 95  | 97  | 1 | 1.3450e-01 | 4.0016e+05 |
| 97  | 98  | 1 | 1.2140e-01 | 5.4225e+05 |
| 97  | 99  | 1 | 1.5080e-01 | 2.7472e+05 |
| 99  | 100 | 1 | 1.5350e-01 | 2.5363e+05 |
| 99  | 107 | 1 | 1.5350e-01 | 2.5363e+05 |
| 100 | 101 | 1 | 1.5080e-01 | 2.7472e+05 |
| 100 | 116 | 1 | 1.5350e-01 | 2.5363e+05 |
| 101 | 102 | 1 | 1.3060e-01 | 3.9028e+05 |
| 101 | 104 | 1 | 1.2140e-01 | 5.4225e+05 |
| 107 | 110 | 1 | 1.5350e-01 | 2.5363e+05 |
| 110 | 113 | 1 | 1.5350e-01 | 2.5363e+05 |
| 113 | 116 | 1 | 1.5350e-01 | 2.5363e+05 |
| 116 | 118 | 1 | 1.4600e-01 | 2.7665e+05 |
| 118 | 120 | 1 | 1.3450e-01 | 4.0016e+05 |
| 120 | 121 | 1 | 1.2140e-01 | 5.4225e+05 |
| 120 | 122 | 1 | 1.5080e-01 | 2.7472e+05 |
| 122 | 123 | 1 | 1.5350e-01 | 2.5363e+05 |
| 122 | 142 | 1 | 1.4600e-01 | 2.7665e+05 |
| 123 | 124 | 1 | 1.4990e-01 | 2.8225e+05 |
| 124 | 125 | 1 | 1.3710e-01 | 4.2175e+05 |
| 124 | 128 | 1 | 1.4340e-01 | 3.4451e+05 |
| 125 | 126 | 1 | 1.3710e-01 | 3.6719e+05 |
| 126 | 127 | 1 | 1.3500e-01 | 3.9355e+05 |
| 127 | 128 | 1 | 1.3870e-01 | 4.0033e+05 |
| 127 | 132 | 1 | 1.3870e-01 | 4.0033e+05 |
| 128 | 129 | 1 | 1.3870e-01 | 4.0033e+05 |
| 129 | 130 | 1 | 1.3870e-01 | 4.0033e+05 |
| 130 | 131 | 1 | 1.3870e-01 | 4.0033e+05 |
| 131 | 132 | 1 | 1.3870e-01 | 4.0033e+05 |
| 142 | 144 | 1 | 1.3450e-01 | 4.0016e+05 |
| 144 | 145 | 1 | 1.2140e-01 | 5.4225e+05 |
| 144 | 146 | 1 | 1.5080e-01 | 2.7472e+05 |
| 146 | 147 | 1 | 1.5350e-01 | 2.5363e+05 |
| 146 | 154 | 1 | 1.5350e-01 | 2.5363e+05 |
| 147 | 148 | 1 | 1.5080e-01 | 2.7472e+05 |
| 147 | 163 | 1 | 1.5350e-01 | 2.5363e+05 |
| 148 | 149 | 1 | 1.3060e-01 | 3.9028e+05 |
| 148 | 151 | 1 | 1.2140e-01 | 5.4225e+05 |
| 154 | 157 | 1 | 1.5350e-01 | 2.5363e+05 |
| 157 | 160 | 1 | 1.5350e-01 | 2.5363e+05 |
| 160 | 163 | 1 | 1.5350e-01 | 2.5363e+05 |
| 163 | 165 | 1 | 1.4600e-01 | 2.7665e+05 |
| 165 | 167 | 1 | 1.3450e-01 | 4.0016e+05 |
| 167 | 168 | 1 | 1.2140e-01 | 5.4225e+05 |
| 167 | 169 | 1 | 1.5080e-01 | 2.7472e+05 |
| 169 | 171 | 1 | 1.5350e-01 | 2.5363e+05 |
| 171 | 174 | 1 | 1.4990e-01 | 2.8225e+05 |
| 174 | 175 | 1 | 1.3710e-01 | 4.2175e+05 |
| 174 | 180 | 1 | 1.4340e-01 | 3.4451e+05 |
| 175 | 177 | 1 | 1.3710e-01 | 3.6719e+05 |
| 177 | 179 | 1 | 1.3500e-01 | 3.9355e+05 |
| 179 | 180 | 1 | 1.3870e-01 | 4.0033e+05 |
| 179 | 187 | 1 | 1.3870e-01 | 4.0033e+05 |
| 180 | 181 | 1 | 1.3870e-01 | 4.0033e+05 |
| 181 | 183 | 1 | 1.3870e-01 | 4.0033e+05 |
| 183 | 185 | 1 | 1.3870e-01 | 4.0033e+05 |
| 185 | 187 | 1 | 1.3870e-01 | 4.0033e+05 |

[ pairs ]  
; ai aj funct

|    |    |   |
|----|----|---|
| 1  | 6  | 1 |
| 1  | 13 | 1 |
| 2  | 5  | 1 |
| 8  | 3  | 1 |
| 4  | 7  | 1 |
| 5  | 6  | 1 |
| 5  | 9  | 1 |
| 5  | 15 | 1 |
| 6  | 7  | 1 |
| 6  | 14 | 1 |
| 8  | 7  | 1 |
| 9  | 7  | 1 |
| 8  | 10 | 1 |
| 8  | 14 | 1 |
| 9  | 12 | 1 |
| 11 | 17 | 1 |
| 11 | 18 | 1 |
| 12 | 13 | 1 |
| 12 | 14 | 1 |
| 12 | 16 | 1 |
| 13 | 14 | 1 |
| 13 | 15 | 1 |
| 14 | 17 | 1 |
| 14 | 18 | 1 |
| 15 | 47 | 1 |
| 16 | 49 | 1 |
| 17 | 20 | 1 |
| 17 | 47 | 1 |
| 17 | 48 | 1 |
| 18 | 20 | 1 |
| 18 | 47 | 1 |
| 18 | 48 | 1 |
| 19 | 45 | 1 |
| 20 | 49 | 1 |
| 20 | 44 | 1 |
| 21 | 47 | 1 |
| 21 | 39 | 1 |
| 21 | 32 | 1 |
| 21 | 33 | 1 |

|    |     |   |
|----|-----|---|
| 22 | 38  | 1 |
| 22 | 34  | 1 |
| 22 | 35  | 1 |
| 23 | 45  | 1 |
| 23 | 32  | 1 |
| 23 | 33  | 1 |
| 23 | 36  | 1 |
| 23 | 37  | 1 |
| 23 | 42  | 1 |
| 24 | 44  | 1 |
| 24 | 27  | 1 |
| 24 | 34  | 1 |
| 24 | 35  | 1 |
| 25 | 39  | 1 |
| 25 | 36  | 1 |
| 25 | 37  | 1 |
| 25 | 170 | 1 |
| 26 | 38  | 1 |
| 26 | 172 | 1 |
| 26 | 173 | 1 |
| 27 | 28  | 1 |
| 27 | 167 | 1 |
| 27 | 170 | 1 |
| 27 | 171 | 1 |
| 28 | 38  | 1 |
| 29 | 39  | 1 |
| 29 | 32  | 1 |
| 29 | 33  | 1 |
| 30 | 38  | 1 |
| 30 | 44  | 1 |
| 31 | 36  | 1 |
| 31 | 37  | 1 |
| 31 | 45  | 1 |
| 31 | 39  | 1 |
| 32 | 34  | 1 |
| 32 | 35  | 1 |
| 32 | 44  | 1 |
| 33 | 34  | 1 |
| 33 | 35  | 1 |
| 33 | 44  | 1 |
| 34 | 36  | 1 |
| 34 | 37  | 1 |
| 35 | 36  | 1 |
| 35 | 37  | 1 |
| 36 | 38  | 1 |
| 37 | 38  | 1 |
| 38 | 39  | 1 |
| 38 | 40  | 1 |
| 39 | 44  | 1 |
| 39 | 41  | 1 |
| 39 | 43  | 1 |
| 40 | 44  | 1 |
| 42 | 43  | 1 |
| 44 | 45  | 1 |
| 45 | 46  | 1 |
| 46 | 47  | 1 |
| 47 | 49  | 1 |
| 47 | 50  | 1 |
| 48 | 59  | 1 |
| 49 | 51  | 1 |
| 49 | 52  | 1 |
| 50 | 58  | 1 |
| 50 | 61  | 1 |
| 50 | 62  | 1 |
| 51 | 59  | 1 |
| 52 | 70  | 1 |
| 52 | 64  | 1 |
| 52 | 65  | 1 |
| 53 | 61  | 1 |
| 53 | 62  | 1 |
| 53 | 56  | 1 |
| 53 | 67  | 1 |
| 53 | 68  | 1 |
| 53 | 72  | 1 |
| 54 | 59  | 1 |
| 54 | 70  | 1 |
| 55 | 58  | 1 |
| 56 | 57  | 1 |
| 57 | 58  | 1 |
| 58 | 59  | 1 |
| 58 | 60  | 1 |
| 58 | 66  | 1 |
| 58 | 70  | 1 |
| 58 | 71  | 1 |
| 59 | 69  | 1 |
| 59 | 61  | 1 |
| 59 | 62  | 1 |
| 59 | 63  | 1 |
| 60 | 67  | 1 |
| 60 | 68  | 1 |
| 61 | 64  | 1 |
| 61 | 65  | 1 |
| 61 | 66  | 1 |
| 62 | 64  | 1 |
| 62 | 65  | 1 |
| 62 | 66  | 1 |
| 63 | 70  | 1 |
| 64 | 67  | 1 |
| 64 | 68  | 1 |
| 64 | 69  | 1 |
| 65 | 67  | 1 |
| 65 | 68  | 1 |
| 65 | 69  | 1 |
| 66 | 72  | 1 |
| 67 | 70  | 1 |
| 67 | 71  | 1 |
| 68 | 70  | 1 |
| 68 | 71  | 1 |
| 70 | 72  | 1 |
| 70 | 73  | 1 |
| 71 | 94  | 1 |
| 72 | 74  | 1 |
| 72 | 75  | 1 |



|     |     |   |
|-----|-----|---|
| 73  | 92  | 1 |
| 73  | 93  | 1 |
| 73  | 96  | 1 |
| 74  | 94  | 1 |
| 76  | 96  | 1 |
| 76  | 91  | 1 |
| 77  | 94  | 1 |
| 77  | 90  | 1 |
| 77  | 89  | 1 |
| 78  | 92  | 1 |
| 78  | 93  | 1 |
| 79  | 86  | 1 |
| 80  | 91  | 1 |
| 80  | 89  | 1 |
| 80  | 87  | 1 |
| 81  | 90  | 1 |
| 81  | 86  | 1 |
| 81  | 88  | 1 |
| 81  | 92  | 1 |
| 81  | 93  | 1 |
| 81  | 91  | 1 |
| 82  | 87  | 1 |
| 83  | 86  | 1 |
| 84  | 89  | 1 |
| 85  | 88  | 1 |
| 85  | 90  | 1 |
| 86  | 87  | 1 |
| 87  | 88  | 1 |
| 88  | 89  | 1 |
| 90  | 91  | 1 |
| 92  | 94  | 1 |
| 92  | 95  | 1 |
| 93  | 94  | 1 |
| 93  | 95  | 1 |
| 94  | 96  | 1 |
| 94  | 97  | 1 |
| 95  | 106 | 1 |
| 96  | 98  | 1 |
| 96  | 99  | 1 |
| 97  | 105 | 1 |
| 97  | 108 | 1 |
| 97  | 109 | 1 |
| 98  | 106 | 1 |
| 99  | 117 | 1 |
| 99  | 111 | 1 |
| 99  | 112 | 1 |
| 100 | 108 | 1 |
| 100 | 109 | 1 |
| 100 | 103 | 1 |
| 100 | 114 | 1 |
| 100 | 115 | 1 |
| 100 | 119 | 1 |
| 101 | 106 | 1 |
| 101 | 117 | 1 |
| 102 | 105 | 1 |
| 103 | 104 | 1 |
| 104 | 105 | 1 |
| 105 | 106 | 1 |
| 105 | 107 | 1 |
| 105 | 113 | 1 |
| 105 | 117 | 1 |
| 105 | 118 | 1 |
| 106 | 116 | 1 |
| 106 | 108 | 1 |
| 106 | 109 | 1 |
| 106 | 110 | 1 |
| 107 | 114 | 1 |
| 107 | 115 | 1 |
| 108 | 111 | 1 |
| 108 | 112 | 1 |
| 108 | 113 | 1 |
| 109 | 111 | 1 |
| 109 | 112 | 1 |
| 109 | 113 | 1 |
| 110 | 117 | 1 |
| 111 | 114 | 1 |
| 111 | 115 | 1 |
| 111 | 116 | 1 |
| 112 | 114 | 1 |
| 112 | 115 | 1 |
| 112 | 116 | 1 |
| 113 | 119 | 1 |
| 114 | 117 | 1 |
| 114 | 118 | 1 |
| 115 | 117 | 1 |
| 115 | 118 | 1 |
| 117 | 119 | 1 |
| 117 | 120 | 1 |
| 118 | 141 | 1 |
| 119 | 121 | 1 |
| 119 | 122 | 1 |
| 120 | 139 | 1 |
| 120 | 140 | 1 |
| 120 | 143 | 1 |
| 121 | 141 | 1 |
| 123 | 143 | 1 |
| 123 | 138 | 1 |
| 124 | 141 | 1 |
| 124 | 137 | 1 |
| 124 | 136 | 1 |
| 125 | 139 | 1 |
| 125 | 140 | 1 |
| 126 | 133 | 1 |
| 127 | 138 | 1 |
| 127 | 136 | 1 |
| 127 | 134 | 1 |
| 128 | 137 | 1 |
| 128 | 133 | 1 |
| 128 | 135 | 1 |
| 128 | 139 | 1 |
| 128 | 140 | 1 |
| 128 | 138 | 1 |
| 129 | 134 | 1 |

|     |     |   |
|-----|-----|---|
| 130 | 133 | 1 |
| 131 | 136 | 1 |
| 132 | 135 | 1 |
| 132 | 137 | 1 |
| 133 | 134 | 1 |
| 134 | 135 | 1 |
| 135 | 136 | 1 |
| 137 | 138 | 1 |
| 139 | 141 | 1 |
| 139 | 142 | 1 |
| 140 | 141 | 1 |
| 140 | 142 | 1 |
| 141 | 143 | 1 |
| 141 | 144 | 1 |
| 142 | 153 | 1 |
| 143 | 145 | 1 |
| 143 | 146 | 1 |
| 144 | 152 | 1 |
| 144 | 155 | 1 |
| 144 | 156 | 1 |
| 145 | 153 | 1 |
| 146 | 164 | 1 |
| 146 | 158 | 1 |
| 146 | 159 | 1 |
| 147 | 155 | 1 |
| 147 | 156 | 1 |
| 147 | 150 | 1 |
| 147 | 161 | 1 |
| 147 | 162 | 1 |
| 147 | 166 | 1 |
| 148 | 153 | 1 |
| 148 | 164 | 1 |
| 149 | 152 | 1 |
| 150 | 151 | 1 |
| 151 | 152 | 1 |
| 152 | 153 | 1 |
| 152 | 154 | 1 |
| 152 | 160 | 1 |
| 152 | 164 | 1 |
| 152 | 165 | 1 |
| 153 | 163 | 1 |
| 153 | 155 | 1 |
| 153 | 156 | 1 |
| 153 | 157 | 1 |
| 154 | 161 | 1 |
| 154 | 162 | 1 |
| 155 | 158 | 1 |
| 155 | 159 | 1 |
| 155 | 160 | 1 |
| 156 | 158 | 1 |
| 156 | 159 | 1 |
| 156 | 160 | 1 |
| 157 | 164 | 1 |
| 158 | 161 | 1 |
| 158 | 162 | 1 |
| 158 | 163 | 1 |
| 159 | 161 | 1 |
| 159 | 162 | 1 |
| 159 | 163 | 1 |
| 160 | 166 | 1 |
| 161 | 164 | 1 |
| 161 | 165 | 1 |
| 162 | 164 | 1 |
| 162 | 165 | 1 |
| 164 | 166 | 1 |
| 164 | 167 | 1 |
| 165 | 170 | 1 |
| 166 | 168 | 1 |
| 166 | 169 | 1 |
| 167 | 172 | 1 |
| 167 | 173 | 1 |
| 168 | 170 | 1 |
| 170 | 172 | 1 |
| 170 | 173 | 1 |
| 170 | 174 | 1 |
| 171 | 176 | 1 |
| 172 | 175 | 1 |
| 172 | 180 | 1 |
| 173 | 175 | 1 |
| 173 | 180 | 1 |
| 174 | 178 | 1 |
| 174 | 182 | 1 |
| 176 | 180 | 1 |
| 176 | 178 | 1 |
| 176 | 179 | 1 |
| 177 | 188 | 1 |
| 178 | 180 | 1 |
| 178 | 187 | 1 |
| 179 | 182 | 1 |
| 179 | 186 | 1 |
| 180 | 188 | 1 |
| 180 | 184 | 1 |
| 181 | 186 | 1 |
| 182 | 184 | 1 |
| 182 | 185 | 1 |
| 183 | 188 | 1 |
| 184 | 186 | 1 |
| 184 | 187 | 1 |
| 186 | 188 | 1 |
| 1   | 4   | 1 |
| 1   | 11  | 1 |
| 1   | 15  | 1 |
| 2   | 10  | 1 |
| 2   | 14  | 1 |
| 9   | 3   | 1 |
| 3   | 15  | 1 |
| 4   | 10  | 1 |
| 4   | 16  | 1 |
| 4   | 11  | 1 |
| 9   | 16  | 1 |
| 10  | 16  | 1 |
| 11  | 19  | 1 |
| 14  | 19  | 1 |

|     |     |   |
|-----|-----|---|
| 15  | 20  | 1 |
| 15  | 48  | 1 |
| 16  | 21  | 1 |
| 16  | 46  | 1 |
| 16  | 50  | 1 |
| 19  | 22  | 1 |
| 19  | 51  | 1 |
| 19  | 52  | 1 |
| 20  | 50  | 1 |
| 20  | 23  | 1 |
| 20  | 31  | 1 |
| 21  | 48  | 1 |
| 21  | 24  | 1 |
| 21  | 40  | 1 |
| 21  | 30  | 1 |
| 22  | 46  | 1 |
| 22  | 25  | 1 |
| 22  | 29  | 1 |
| 22  | 41  | 1 |
| 22  | 43  | 1 |
| 23  | 30  | 1 |
| 23  | 26  | 1 |
| 23  | 28  | 1 |
| 24  | 31  | 1 |
| 24  | 41  | 1 |
| 24  | 43  | 1 |
| 24  | 169 | 1 |
| 25  | 40  | 1 |
| 25  | 30  | 1 |
| 25  | 167 | 1 |
| 25  | 171 | 1 |
| 26  | 29  | 1 |
| 26  | 165 | 1 |
| 26  | 168 | 1 |
| 26  | 174 | 1 |
| 28  | 29  | 1 |
| 28  | 169 | 1 |
| 29  | 40  | 1 |
| 31  | 40  | 1 |
| 46  | 48  | 1 |
| 48  | 53  | 1 |
| 48  | 60  | 1 |
| 50  | 54  | 1 |
| 50  | 69  | 1 |
| 50  | 63  | 1 |
| 51  | 53  | 1 |
| 51  | 60  | 1 |
| 52  | 55  | 1 |
| 52  | 57  | 1 |
| 52  | 66  | 1 |
| 52  | 71  | 1 |
| 53  | 63  | 1 |
| 53  | 73  | 1 |
| 54  | 60  | 1 |
| 54  | 66  | 1 |
| 54  | 71  | 1 |
| 55  | 69  | 1 |
| 57  | 69  | 1 |
| 60  | 69  | 1 |
| 63  | 71  | 1 |
| 66  | 73  | 1 |
| 69  | 74  | 1 |
| 69  | 75  | 1 |
| 71  | 76  | 1 |
| 71  | 95  | 1 |
| 73  | 77  | 1 |
| 73  | 97  | 1 |
| 74  | 76  | 1 |
| 74  | 95  | 1 |
| 75  | 78  | 1 |
| 75  | 81  | 1 |
| 75  | 98  | 1 |
| 75  | 99  | 1 |
| 76  | 97  | 1 |
| 76  | 79  | 1 |
| 76  | 80  | 1 |
| 76  | 82  | 1 |
| 77  | 95  | 1 |
| 77  | 85  | 1 |
| 77  | 83  | 1 |
| 78  | 82  | 1 |
| 78  | 85  | 1 |
| 79  | 82  | 1 |
| 79  | 84  | 1 |
| 80  | 83  | 1 |
| 81  | 84  | 1 |
| 82  | 85  | 1 |
| 95  | 100 | 1 |
| 95  | 107 | 1 |
| 97  | 101 | 1 |
| 97  | 116 | 1 |
| 97  | 110 | 1 |
| 98  | 100 | 1 |
| 98  | 107 | 1 |
| 99  | 102 | 1 |
| 99  | 104 | 1 |
| 99  | 113 | 1 |
| 99  | 118 | 1 |
| 100 | 110 | 1 |
| 100 | 120 | 1 |
| 101 | 107 | 1 |
| 101 | 113 | 1 |
| 101 | 118 | 1 |
| 102 | 116 | 1 |
| 104 | 116 | 1 |
| 107 | 116 | 1 |
| 110 | 118 | 1 |
| 113 | 120 | 1 |
| 116 | 121 | 1 |
| 116 | 122 | 1 |
| 118 | 123 | 1 |
| 118 | 142 | 1 |
| 120 | 124 | 1 |

|     |     |   |
|-----|-----|---|
| 120 | 144 | 1 |
| 121 | 123 | 1 |
| 121 | 142 | 1 |
| 122 | 125 | 1 |
| 122 | 128 | 1 |
| 122 | 145 | 1 |
| 122 | 146 | 1 |
| 123 | 144 | 1 |
| 123 | 126 | 1 |
| 123 | 127 | 1 |
| 123 | 129 | 1 |
| 124 | 142 | 1 |
| 124 | 132 | 1 |
| 124 | 130 | 1 |
| 125 | 129 | 1 |
| 125 | 132 | 1 |
| 126 | 129 | 1 |
| 126 | 131 | 1 |
| 127 | 130 | 1 |
| 128 | 131 | 1 |
| 129 | 132 | 1 |
| 142 | 147 | 1 |
| 142 | 154 | 1 |
| 144 | 148 | 1 |
| 144 | 163 | 1 |
| 144 | 157 | 1 |
| 145 | 147 | 1 |
| 145 | 154 | 1 |
| 146 | 149 | 1 |
| 146 | 151 | 1 |
| 146 | 160 | 1 |
| 146 | 165 | 1 |
| 147 | 157 | 1 |
| 147 | 167 | 1 |
| 148 | 154 | 1 |
| 148 | 160 | 1 |
| 148 | 165 | 1 |
| 149 | 163 | 1 |
| 151 | 163 | 1 |
| 154 | 163 | 1 |
| 157 | 165 | 1 |
| 160 | 167 | 1 |
| 163 | 168 | 1 |
| 163 | 169 | 1 |
| 165 | 171 | 1 |
| 167 | 174 | 1 |
| 168 | 171 | 1 |
| 169 | 175 | 1 |
| 169 | 180 | 1 |
| 171 | 177 | 1 |
| 171 | 179 | 1 |
| 171 | 181 | 1 |
| 174 | 187 | 1 |
| 174 | 183 | 1 |
| 175 | 181 | 1 |
| 175 | 187 | 1 |
| 177 | 181 | 1 |
| 177 | 185 | 1 |
| 179 | 183 | 1 |
| 180 | 185 | 1 |
| 181 | 187 | 1 |

[ angles ]

| ; | ai | aj  | ak  | funct | theta      | cth        |
|---|----|-----|-----|-------|------------|------------|
|   | 1  | 2   | 7   | 1     | 1.2001e+02 | 4.0551e+02 |
|   | 2  | 1   | 8   | 1     | 1.2001e+02 | 4.0551e+02 |
|   | 2  | 3   | 6   | 1     | 1.2001e+02 | 4.0551e+02 |
|   | 3  | 2   | 7   | 1     | 1.2001e+02 | 4.0551e+02 |
|   | 3  | 4   | 5   | 1     | 1.2001e+02 | 4.0551e+02 |
|   | 4  | 3   | 6   | 1     | 1.2001e+02 | 4.0551e+02 |
|   | 5  | 4   | 14  | 1     | 1.2001e+02 | 4.0551e+02 |
|   | 8  | 1   | 9   | 1     | 1.2001e+02 | 4.0551e+02 |
|   | 9  | 10  | 13  | 1     | 1.2559e+02 | 3.9857e+02 |
|   | 10 | 11  | 12  | 1     | 1.1966e+02 | 4.2024e+02 |
|   | 11 | 10  | 13  | 1     | 1.2522e+02 | 3.9388e+02 |
|   | 12 | 11  | 15  | 1     | 1.2911e+02 | 3.9489e+02 |
|   | 15 | 16  | 17  | 1     | 1.1086e+02 | 3.9497e+02 |
|   | 15 | 16  | 18  | 1     | 1.1086e+02 | 3.9497e+02 |
|   | 16 | 19  | 47  | 1     | 1.1007e+02 | 3.8794e+02 |
|   | 17 | 16  | 18  | 1     | 1.0835e+02 | 3.2995e+02 |
|   | 17 | 16  | 19  | 1     | 1.1005e+02 | 3.8802e+02 |
|   | 18 | 16  | 19  | 1     | 1.1005e+02 | 3.8802e+02 |
|   | 19 | 48  | 49  | 1     | 1.1678e+02 | 3.8526e+02 |
|   | 20 | 19  | 47  | 1     | 1.0766e+02 | 3.9857e+02 |
|   | 20 | 21  | 45  | 1     | 1.1846e+02 | 4.1179e+02 |
|   | 21 | 22  | 44  | 1     | 1.0932e+02 | 4.1689e+02 |
|   | 22 | 21  | 45  | 1     | 1.1678e+02 | 3.8526e+02 |
|   | 22 | 23  | 39  | 1     | 1.1005e+02 | 3.8802e+02 |
|   | 22 | 31  | 32  | 1     | 1.1005e+02 | 3.8802e+02 |
|   | 22 | 31  | 33  | 1     | 1.1005e+02 | 3.8802e+02 |
|   | 23 | 22  | 44  | 1     | 1.1007e+02 | 3.8794e+02 |
|   | 23 | 24  | 38  | 1     | 1.1005e+02 | 3.8802e+02 |
|   | 24 | 23  | 39  | 1     | 1.1005e+02 | 3.8802e+02 |
|   | 24 | 29  | 36  | 1     | 1.1005e+02 | 3.8802e+02 |
|   | 24 | 29  | 37  | 1     | 1.1005e+02 | 3.8802e+02 |
|   | 25 | 24  | 38  | 1     | 1.0968e+02 | 3.9497e+02 |
|   | 25 | 26  | 27  | 1     | 1.1846e+02 | 4.1179e+02 |
|   | 26 | 169 | 170 | 1     | 1.0932e+02 | 4.1689e+02 |
|   | 27 | 26  | 169 | 1     | 1.1678e+02 | 3.8526e+02 |
|   | 29 | 24  | 38  | 1     | 1.1005e+02 | 3.8802e+02 |
|   | 29 | 30  | 34  | 1     | 1.1005e+02 | 3.8802e+02 |
|   | 29 | 30  | 35  | 1     | 1.1005e+02 | 3.8802e+02 |
|   | 30 | 29  | 36  | 1     | 1.1005e+02 | 3.8802e+02 |
|   | 30 | 29  | 37  | 1     | 1.1005e+02 | 3.8802e+02 |
|   | 30 | 31  | 32  | 1     | 1.1005e+02 | 3.8802e+02 |
|   | 30 | 31  | 33  | 1     | 1.1005e+02 | 3.8802e+02 |
|   | 31 | 30  | 34  | 1     | 1.1005e+02 | 3.8802e+02 |
|   | 31 | 30  | 35  | 1     | 1.1005e+02 | 3.8802e+02 |
|   | 31 | 22  | 44  | 1     | 1.1007e+02 | 3.8794e+02 |
|   | 32 | 31  | 33  | 1     | 1.0835e+02 | 3.2995e+02 |
|   | 34 | 30  | 35  | 1     | 1.0835e+02 | 3.2995e+02 |
|   | 36 | 29  | 37  | 1     | 1.0835e+02 | 3.2995e+02 |
|   | 39 | 23  | 40  | 1     | 1.0968e+02 | 3.9497e+02 |

|     |     |     |   |            |            |
|-----|-----|-----|---|------------|------------|
| 40  | 41  | 42  | 1 | 1.0737e+02 | 4.2836e+02 |
| 47  | 19  | 48  | 1 | 1.0932e+02 | 4.1689e+02 |
| 49  | 48  | 50  | 1 | 1.1846e+02 | 4.1179e+02 |
| 50  | 52  | 59  | 1 | 1.0968e+02 | 3.9497e+02 |
| 52  | 53  | 58  | 1 | 1.1005e+02 | 3.8802e+02 |
| 52  | 60  | 61  | 1 | 1.1005e+02 | 3.8802e+02 |
| 52  | 60  | 62  | 1 | 1.1005e+02 | 3.8802e+02 |
| 53  | 52  | 59  | 1 | 1.1005e+02 | 3.8802e+02 |
| 53  | 69  | 70  | 1 | 1.1007e+02 | 3.8794e+02 |
| 54  | 53  | 58  | 1 | 1.0968e+02 | 3.9497e+02 |
| 54  | 55  | 56  | 1 | 1.0737e+02 | 4.2836e+02 |
| 58  | 53  | 69  | 1 | 1.1005e+02 | 3.8802e+02 |
| 59  | 52  | 60  | 1 | 1.1005e+02 | 3.8802e+02 |
| 60  | 63  | 64  | 1 | 1.1005e+02 | 3.8802e+02 |
| 60  | 63  | 65  | 1 | 1.1005e+02 | 3.8802e+02 |
| 61  | 60  | 62  | 1 | 1.0835e+02 | 3.2995e+02 |
| 61  | 60  | 63  | 1 | 1.1005e+02 | 3.8802e+02 |
| 62  | 60  | 63  | 1 | 1.1005e+02 | 3.8802e+02 |
| 63  | 66  | 67  | 1 | 1.1005e+02 | 3.8802e+02 |
| 63  | 66  | 68  | 1 | 1.1005e+02 | 3.8802e+02 |
| 64  | 63  | 65  | 1 | 1.0835e+02 | 3.2995e+02 |
| 64  | 63  | 66  | 1 | 1.1005e+02 | 3.8802e+02 |
| 65  | 63  | 66  | 1 | 1.1005e+02 | 3.8802e+02 |
| 66  | 69  | 70  | 1 | 1.1007e+02 | 3.8794e+02 |
| 67  | 66  | 68  | 1 | 1.0835e+02 | 3.2995e+02 |
| 67  | 66  | 69  | 1 | 1.1005e+02 | 3.8802e+02 |
| 68  | 66  | 69  | 1 | 1.1005e+02 | 3.8802e+02 |
| 69  | 71  | 72  | 1 | 1.1678e+02 | 3.8526e+02 |
| 70  | 69  | 71  | 1 | 1.0932e+02 | 4.1689e+02 |
| 72  | 71  | 73  | 1 | 1.1846e+02 | 4.1179e+02 |
| 73  | 75  | 94  | 1 | 1.0766e+02 | 3.9857e+02 |
| 75  | 76  | 92  | 1 | 1.1005e+02 | 3.8802e+02 |
| 75  | 76  | 93  | 1 | 1.1005e+02 | 3.8802e+02 |
| 75  | 95  | 96  | 1 | 1.1678e+02 | 3.8526e+02 |
| 76  | 75  | 94  | 1 | 1.1007e+02 | 3.8794e+02 |
| 77  | 76  | 92  | 1 | 1.1086e+02 | 3.9497e+02 |
| 77  | 76  | 93  | 1 | 1.1086e+02 | 3.9497e+02 |
| 77  | 78  | 91  | 1 | 1.2911e+02 | 3.9489e+02 |
| 78  | 79  | 90  | 1 | 1.2522e+02 | 3.9388e+02 |
| 79  | 78  | 91  | 1 | 1.1966e+02 | 4.2024e+02 |
| 80  | 79  | 90  | 1 | 1.2559e+02 | 3.9857e+02 |
| 80  | 85  | 86  | 1 | 1.2001e+02 | 4.0551e+02 |
| 81  | 82  | 89  | 1 | 1.2001e+02 | 4.0551e+02 |
| 82  | 83  | 88  | 1 | 1.2001e+02 | 4.0551e+02 |
| 83  | 82  | 89  | 1 | 1.2001e+02 | 4.0551e+02 |
| 83  | 84  | 87  | 1 | 1.2001e+02 | 4.0551e+02 |
| 84  | 83  | 88  | 1 | 1.2001e+02 | 4.0551e+02 |
| 84  | 85  | 86  | 1 | 1.2001e+02 | 4.0551e+02 |
| 85  | 84  | 87  | 1 | 1.2001e+02 | 4.0551e+02 |
| 92  | 76  | 93  | 1 | 1.0835e+02 | 3.2995e+02 |
| 94  | 75  | 95  | 1 | 1.0932e+02 | 4.1689e+02 |
| 96  | 95  | 97  | 1 | 1.1846e+02 | 4.1179e+02 |
| 97  | 99  | 106 | 1 | 1.0968e+02 | 3.9497e+02 |
| 99  | 100 | 105 | 1 | 1.1005e+02 | 3.8802e+02 |
| 99  | 107 | 108 | 1 | 1.1005e+02 | 3.8802e+02 |
| 99  | 107 | 109 | 1 | 1.1005e+02 | 3.8802e+02 |
| 100 | 99  | 106 | 1 | 1.1005e+02 | 3.8802e+02 |
| 100 | 116 | 117 | 1 | 1.1007e+02 | 3.8794e+02 |
| 101 | 100 | 105 | 1 | 1.0968e+02 | 3.9497e+02 |
| 101 | 102 | 103 | 1 | 1.0737e+02 | 4.2836e+02 |
| 105 | 100 | 116 | 1 | 1.1005e+02 | 3.8802e+02 |
| 106 | 99  | 107 | 1 | 1.1005e+02 | 3.8802e+02 |
| 107 | 110 | 111 | 1 | 1.1005e+02 | 3.8802e+02 |
| 107 | 110 | 112 | 1 | 1.1005e+02 | 3.8802e+02 |
| 108 | 107 | 109 | 1 | 1.0835e+02 | 3.2995e+02 |
| 108 | 107 | 110 | 1 | 1.1005e+02 | 3.8802e+02 |
| 109 | 107 | 110 | 1 | 1.1005e+02 | 3.8802e+02 |
| 110 | 113 | 114 | 1 | 1.1005e+02 | 3.8802e+02 |
| 110 | 113 | 115 | 1 | 1.1005e+02 | 3.8802e+02 |
| 111 | 110 | 112 | 1 | 1.0835e+02 | 3.2995e+02 |
| 111 | 110 | 113 | 1 | 1.1005e+02 | 3.8802e+02 |
| 112 | 110 | 113 | 1 | 1.1005e+02 | 3.8802e+02 |
| 113 | 116 | 117 | 1 | 1.1007e+02 | 3.8794e+02 |
| 114 | 113 | 115 | 1 | 1.0835e+02 | 3.2995e+02 |
| 114 | 113 | 116 | 1 | 1.1005e+02 | 3.8802e+02 |
| 115 | 113 | 116 | 1 | 1.1005e+02 | 3.8802e+02 |
| 116 | 118 | 119 | 1 | 1.1678e+02 | 3.8526e+02 |
| 117 | 116 | 118 | 1 | 1.0932e+02 | 4.1689e+02 |
| 119 | 118 | 120 | 1 | 1.1846e+02 | 4.1179e+02 |
| 120 | 122 | 141 | 1 | 1.0766e+02 | 3.9857e+02 |
| 122 | 123 | 139 | 1 | 1.1005e+02 | 3.8802e+02 |
| 122 | 123 | 140 | 1 | 1.1005e+02 | 3.8802e+02 |
| 122 | 142 | 143 | 1 | 1.1678e+02 | 3.8526e+02 |
| 123 | 122 | 141 | 1 | 1.1007e+02 | 3.8794e+02 |
| 124 | 123 | 139 | 1 | 1.1086e+02 | 3.9497e+02 |
| 124 | 123 | 140 | 1 | 1.1086e+02 | 3.9497e+02 |
| 124 | 125 | 138 | 1 | 1.2911e+02 | 3.9489e+02 |
| 125 | 126 | 137 | 1 | 1.2522e+02 | 3.9388e+02 |
| 126 | 125 | 138 | 1 | 1.1966e+02 | 4.2024e+02 |
| 127 | 126 | 137 | 1 | 1.2559e+02 | 3.9857e+02 |
| 127 | 132 | 133 | 1 | 1.2001e+02 | 4.0551e+02 |
| 128 | 129 | 136 | 1 | 1.2001e+02 | 4.0551e+02 |
| 129 | 130 | 135 | 1 | 1.2001e+02 | 4.0551e+02 |
| 130 | 129 | 136 | 1 | 1.2001e+02 | 4.0551e+02 |
| 130 | 131 | 134 | 1 | 1.2001e+02 | 4.0551e+02 |
| 131 | 130 | 135 | 1 | 1.2001e+02 | 4.0551e+02 |
| 131 | 132 | 133 | 1 | 1.2001e+02 | 4.0551e+02 |
| 132 | 131 | 134 | 1 | 1.2001e+02 | 4.0551e+02 |
| 139 | 123 | 140 | 1 | 1.0835e+02 | 3.2995e+02 |
| 141 | 122 | 142 | 1 | 1.0932e+02 | 4.1689e+02 |
| 143 | 142 | 144 | 1 | 1.1846e+02 | 4.1179e+02 |
| 144 | 146 | 153 | 1 | 1.0968e+02 | 3.9497e+02 |
| 146 | 147 | 152 | 1 | 1.1005e+02 | 3.8802e+02 |
| 146 | 154 | 155 | 1 | 1.1005e+02 | 3.8802e+02 |
| 146 | 154 | 156 | 1 | 1.1005e+02 | 3.8802e+02 |
| 147 | 146 | 153 | 1 | 1.1005e+02 | 3.8802e+02 |
| 147 | 163 | 164 | 1 | 1.1007e+02 | 3.8794e+02 |
| 148 | 147 | 152 | 1 | 1.0968e+02 | 3.9497e+02 |
| 148 | 149 | 150 | 1 | 1.0737e+02 | 4.2836e+02 |
| 152 | 147 | 163 | 1 | 1.1005e+02 | 3.8802e+02 |
| 153 | 146 | 154 | 1 | 1.1005e+02 | 3.8802e+02 |
| 154 | 157 | 158 | 1 | 1.1005e+02 | 3.8802e+02 |
| 154 | 157 | 159 | 1 | 1.1005e+02 | 3.8802e+02 |

|     |     |     |   |            |            |
|-----|-----|-----|---|------------|------------|
| 155 | 154 | 156 | 1 | 1.0835e+02 | 3.2995e+02 |
| 155 | 154 | 157 | 1 | 1.1005e+02 | 3.8802e+02 |
| 156 | 154 | 157 | 1 | 1.1005e+02 | 3.8802e+02 |
| 157 | 160 | 161 | 1 | 1.1005e+02 | 3.8802e+02 |
| 157 | 160 | 162 | 1 | 1.1005e+02 | 3.8802e+02 |
| 158 | 157 | 159 | 1 | 1.0835e+02 | 3.2995e+02 |
| 158 | 157 | 160 | 1 | 1.1005e+02 | 3.8802e+02 |
| 159 | 157 | 160 | 1 | 1.1005e+02 | 3.8802e+02 |
| 160 | 163 | 164 | 1 | 1.1007e+02 | 3.8794e+02 |
| 161 | 160 | 162 | 1 | 1.0835e+02 | 3.2995e+02 |
| 161 | 160 | 163 | 1 | 1.1005e+02 | 3.8802e+02 |
| 162 | 160 | 163 | 1 | 1.1005e+02 | 3.8802e+02 |
| 163 | 165 | 166 | 1 | 1.1678e+02 | 3.8526e+02 |
| 164 | 163 | 165 | 1 | 1.0932e+02 | 4.1689e+02 |
| 166 | 165 | 167 | 1 | 1.1846e+02 | 4.1179e+02 |
| 167 | 169 | 170 | 1 | 1.0766e+02 | 3.9857e+02 |
| 169 | 171 | 172 | 1 | 1.1005e+02 | 3.8802e+02 |
| 169 | 171 | 173 | 1 | 1.1005e+02 | 3.8802e+02 |
| 170 | 169 | 171 | 1 | 1.1007e+02 | 3.8794e+02 |
| 172 | 171 | 173 | 1 | 1.0835e+02 | 3.2995e+02 |
| 172 | 171 | 174 | 1 | 1.1086e+02 | 3.9497e+02 |
| 173 | 171 | 174 | 1 | 1.1086e+02 | 3.9497e+02 |
| 174 | 175 | 176 | 1 | 1.2911e+02 | 3.9489e+02 |
| 175 | 177 | 178 | 1 | 1.2522e+02 | 3.9388e+02 |
| 176 | 175 | 177 | 1 | 1.1966e+02 | 4.2024e+02 |
| 178 | 177 | 179 | 1 | 1.2559e+02 | 3.9857e+02 |
| 179 | 187 | 188 | 1 | 1.2001e+02 | 4.0551e+02 |
| 180 | 181 | 182 | 1 | 1.2001e+02 | 4.0551e+02 |
| 181 | 183 | 184 | 1 | 1.2001e+02 | 4.0551e+02 |
| 182 | 181 | 183 | 1 | 1.2001e+02 | 4.0551e+02 |
| 183 | 185 | 186 | 1 | 1.2001e+02 | 4.0551e+02 |
| 184 | 183 | 185 | 1 | 1.2001e+02 | 4.0551e+02 |
| 185 | 187 | 188 | 1 | 1.2001e+02 | 4.0551e+02 |
| 186 | 185 | 187 | 1 | 1.2001e+02 | 4.0551e+02 |
| 1   | 2   | 3   | 1 | 1.1997e+02 | 5.6216e+02 |
| 1   | 9   | 10  | 1 | 1.1834e+02 | 5.8752e+02 |
| 1   | 9   | 14  | 1 | 1.1997e+02 | 5.6216e+02 |
| 2   | 1   | 9   | 1 | 1.1997e+02 | 5.6216e+02 |
| 2   | 3   | 4   | 1 | 1.1997e+02 | 5.6216e+02 |
| 3   | 4   | 14  | 1 | 1.1997e+02 | 5.6216e+02 |
| 4   | 14  | 9   | 1 | 1.1997e+02 | 5.6216e+02 |
| 4   | 14  | 15  | 1 | 1.2010e+02 | 5.5220e+02 |
| 9   | 10  | 11  | 1 | 1.1315e+02 | 5.7287e+02 |
| 9   | 14  | 15  | 1 | 1.2010e+02 | 5.5220e+02 |
| 10  | 9   | 14  | 1 | 1.1834e+02 | 5.8752e+02 |
| 10  | 11  | 15  | 1 | 1.0942e+02 | 6.1011e+02 |
| 11  | 15  | 14  | 1 | 1.1351e+02 | 5.7095e+02 |
| 11  | 15  | 16  | 1 | 1.1945e+02 | 5.4233e+02 |
| 14  | 15  | 16  | 1 | 1.2643e+02 | 5.1739e+02 |
| 15  | 16  | 19  | 1 | 1.1192e+02 | 5.3195e+02 |
| 16  | 19  | 20  | 1 | 1.1053e+02 | 5.3379e+02 |
| 16  | 19  | 48  | 1 | 1.1213e+02 | 5.5103e+02 |
| 19  | 20  | 21  | 1 | 1.1515e+02 | 5.6785e+02 |
| 19  | 20  | 46  | 1 | 1.2311e+02 | 5.6928e+02 |
| 19  | 48  | 50  | 1 | 1.2135e+02 | 5.3488e+02 |
| 20  | 19  | 48  | 1 | 1.1156e+02 | 5.5789e+02 |
| 20  | 21  | 22  | 1 | 1.2135e+02 | 5.3488e+02 |
| 21  | 20  | 46  | 1 | 1.2203e+02 | 6.3455e+02 |
| 21  | 22  | 23  | 1 | 1.1213e+02 | 5.5103e+02 |
| 21  | 22  | 31  | 1 | 1.1213e+02 | 5.5103e+02 |
| 22  | 23  | 24  | 1 | 1.1063e+02 | 5.2894e+02 |
| 22  | 23  | 40  | 1 | 1.1053e+02 | 5.3379e+02 |
| 22  | 31  | 30  | 1 | 1.1063e+02 | 5.2894e+02 |
| 23  | 22  | 31  | 1 | 1.1063e+02 | 5.2894e+02 |
| 23  | 24  | 25  | 1 | 1.1053e+02 | 5.3379e+02 |
| 23  | 24  | 29  | 1 | 1.1063e+02 | 5.2894e+02 |
| 23  | 40  | 41  | 1 | 1.1220e+02 | 5.8442e+02 |
| 23  | 40  | 43  | 1 | 1.2311e+02 | 5.6928e+02 |
| 24  | 23  | 40  | 1 | 1.1053e+02 | 5.3379e+02 |
| 24  | 25  | 26  | 1 | 1.1515e+02 | 5.6785e+02 |
| 24  | 25  | 28  | 1 | 1.2311e+02 | 5.6928e+02 |
| 24  | 29  | 30  | 1 | 1.1063e+02 | 5.2894e+02 |
| 25  | 24  | 29  | 1 | 1.1053e+02 | 5.3379e+02 |
| 25  | 26  | 169 | 1 | 1.2135e+02 | 5.3488e+02 |
| 26  | 25  | 28  | 1 | 1.2203e+02 | 6.3455e+02 |
| 26  | 169 | 167 | 1 | 1.1156e+02 | 5.5789e+02 |
| 26  | 169 | 171 | 1 | 1.1213e+02 | 5.5103e+02 |
| 29  | 30  | 31  | 1 | 1.1063e+02 | 5.2894e+02 |
| 41  | 40  | 43  | 1 | 1.2288e+02 | 6.4752e+02 |
| 48  | 50  | 51  | 1 | 1.2203e+02 | 6.3455e+02 |
| 48  | 50  | 52  | 1 | 1.1515e+02 | 5.6785e+02 |
| 50  | 52  | 53  | 1 | 1.1053e+02 | 5.3379e+02 |
| 50  | 52  | 60  | 1 | 1.1053e+02 | 5.3379e+02 |
| 51  | 50  | 52  | 1 | 1.2311e+02 | 5.6928e+02 |
| 52  | 53  | 54  | 1 | 1.1053e+02 | 5.3379e+02 |
| 52  | 53  | 69  | 1 | 1.1063e+02 | 5.2894e+02 |
| 52  | 60  | 63  | 1 | 1.1063e+02 | 5.2894e+02 |
| 53  | 52  | 60  | 1 | 1.1063e+02 | 5.2894e+02 |
| 53  | 54  | 55  | 1 | 1.1220e+02 | 5.8442e+02 |
| 53  | 54  | 57  | 1 | 1.2311e+02 | 5.6928e+02 |
| 53  | 69  | 66  | 1 | 1.1063e+02 | 5.2894e+02 |
| 53  | 69  | 71  | 1 | 1.1213e+02 | 5.5103e+02 |
| 54  | 53  | 69  | 1 | 1.1053e+02 | 5.3379e+02 |
| 55  | 54  | 57  | 1 | 1.2288e+02 | 6.4752e+02 |
| 60  | 63  | 66  | 1 | 1.1063e+02 | 5.2894e+02 |
| 63  | 66  | 69  | 1 | 1.1063e+02 | 5.2894e+02 |
| 66  | 69  | 71  | 1 | 1.1213e+02 | 5.5103e+02 |
| 69  | 71  | 73  | 1 | 1.2135e+02 | 5.3488e+02 |
| 71  | 73  | 74  | 1 | 1.2203e+02 | 6.3455e+02 |
| 71  | 73  | 75  | 1 | 1.1515e+02 | 5.6785e+02 |
| 73  | 75  | 76  | 1 | 1.1053e+02 | 5.3379e+02 |
| 73  | 75  | 95  | 1 | 1.1156e+02 | 5.5789e+02 |
| 74  | 73  | 75  | 1 | 1.2311e+02 | 5.6928e+02 |
| 75  | 76  | 77  | 1 | 1.1192e+02 | 5.3195e+02 |
| 75  | 95  | 97  | 1 | 1.2135e+02 | 5.3488e+02 |
| 76  | 75  | 95  | 1 | 1.1213e+02 | 5.5103e+02 |
| 76  | 77  | 78  | 1 | 1.1945e+02 | 5.4233e+02 |
| 76  | 77  | 81  | 1 | 1.2643e+02 | 5.1739e+02 |
| 77  | 78  | 79  | 1 | 1.0942e+02 | 6.1011e+02 |
| 77  | 81  | 80  | 1 | 1.2010e+02 | 5.5220e+02 |
| 77  | 81  | 82  | 1 | 1.2010e+02 | 5.5220e+02 |
| 78  | 77  | 81  | 1 | 1.1351e+02 | 5.7095e+02 |
| 78  | 79  | 80  | 1 | 1.1315e+02 | 5.7287e+02 |

|     |     |     |   |            |            |
|-----|-----|-----|---|------------|------------|
| 79  | 80  | 81  | 1 | 1.1834e+02 | 5.8752e+02 |
| 79  | 80  | 85  | 1 | 1.1834e+02 | 5.8752e+02 |
| 80  | 81  | 82  | 1 | 1.1997e+02 | 5.6216e+02 |
| 80  | 85  | 84  | 1 | 1.1997e+02 | 5.6216e+02 |
| 81  | 80  | 85  | 1 | 1.1997e+02 | 5.6216e+02 |
| 81  | 82  | 83  | 1 | 1.1997e+02 | 5.6216e+02 |
| 82  | 83  | 84  | 1 | 1.1997e+02 | 5.6216e+02 |
| 83  | 84  | 85  | 1 | 1.1997e+02 | 5.6216e+02 |
| 95  | 97  | 98  | 1 | 1.2203e+02 | 6.3455e+02 |
| 95  | 97  | 99  | 1 | 1.1515e+02 | 5.6785e+02 |
| 97  | 99  | 100 | 1 | 1.1053e+02 | 5.3379e+02 |
| 97  | 99  | 107 | 1 | 1.1053e+02 | 5.3379e+02 |
| 98  | 97  | 99  | 1 | 1.2311e+02 | 5.6928e+02 |
| 99  | 100 | 101 | 1 | 1.1053e+02 | 5.3379e+02 |
| 99  | 100 | 116 | 1 | 1.1063e+02 | 5.2894e+02 |
| 99  | 107 | 110 | 1 | 1.1063e+02 | 5.2894e+02 |
| 100 | 99  | 107 | 1 | 1.1063e+02 | 5.2894e+02 |
| 100 | 101 | 102 | 1 | 1.1220e+02 | 5.8442e+02 |
| 100 | 101 | 104 | 1 | 1.2311e+02 | 5.6928e+02 |
| 100 | 116 | 113 | 1 | 1.1063e+02 | 5.2894e+02 |
| 100 | 116 | 118 | 1 | 1.1213e+02 | 5.5103e+02 |
| 101 | 100 | 116 | 1 | 1.1053e+02 | 5.3379e+02 |
| 102 | 101 | 104 | 1 | 1.2288e+02 | 6.4752e+02 |
| 107 | 110 | 113 | 1 | 1.1063e+02 | 5.2894e+02 |
| 110 | 113 | 116 | 1 | 1.1063e+02 | 5.2894e+02 |
| 113 | 116 | 118 | 1 | 1.1213e+02 | 5.5103e+02 |
| 116 | 118 | 120 | 1 | 1.2135e+02 | 5.3488e+02 |
| 118 | 120 | 121 | 1 | 1.2203e+02 | 6.3455e+02 |
| 118 | 120 | 122 | 1 | 1.1515e+02 | 5.6785e+02 |
| 120 | 122 | 123 | 1 | 1.1053e+02 | 5.3379e+02 |
| 120 | 122 | 142 | 1 | 1.1156e+02 | 5.5789e+02 |
| 121 | 120 | 122 | 1 | 1.2311e+02 | 5.6928e+02 |
| 122 | 123 | 124 | 1 | 1.1192e+02 | 5.3195e+02 |
| 122 | 142 | 144 | 1 | 1.2135e+02 | 5.3488e+02 |
| 123 | 122 | 142 | 1 | 1.1213e+02 | 5.5103e+02 |
| 123 | 124 | 125 | 1 | 1.1945e+02 | 5.4233e+02 |
| 123 | 124 | 128 | 1 | 1.2643e+02 | 5.1739e+02 |
| 124 | 125 | 126 | 1 | 1.0942e+02 | 6.1011e+02 |
| 124 | 128 | 127 | 1 | 1.2010e+02 | 5.5220e+02 |
| 124 | 128 | 129 | 1 | 1.2010e+02 | 5.5220e+02 |
| 125 | 124 | 128 | 1 | 1.1351e+02 | 5.7095e+02 |
| 125 | 126 | 127 | 1 | 1.1315e+02 | 5.7287e+02 |
| 126 | 127 | 128 | 1 | 1.1834e+02 | 5.8752e+02 |
| 126 | 127 | 132 | 1 | 1.1834e+02 | 5.8752e+02 |
| 127 | 128 | 129 | 1 | 1.1997e+02 | 5.6216e+02 |
| 127 | 132 | 131 | 1 | 1.1997e+02 | 5.6216e+02 |
| 128 | 127 | 132 | 1 | 1.1997e+02 | 5.6216e+02 |
| 128 | 129 | 130 | 1 | 1.1997e+02 | 5.6216e+02 |
| 129 | 130 | 131 | 1 | 1.1997e+02 | 5.6216e+02 |
| 130 | 131 | 132 | 1 | 1.1997e+02 | 5.6216e+02 |
| 142 | 144 | 145 | 1 | 1.2203e+02 | 6.3455e+02 |
| 142 | 144 | 146 | 1 | 1.1515e+02 | 5.6785e+02 |
| 144 | 146 | 147 | 1 | 1.1053e+02 | 5.3379e+02 |
| 144 | 146 | 154 | 1 | 1.1053e+02 | 5.3379e+02 |
| 145 | 144 | 146 | 1 | 1.2311e+02 | 5.6928e+02 |
| 146 | 147 | 148 | 1 | 1.1053e+02 | 5.3379e+02 |
| 146 | 147 | 163 | 1 | 1.1063e+02 | 5.2894e+02 |
| 146 | 154 | 157 | 1 | 1.1063e+02 | 5.2894e+02 |
| 147 | 146 | 154 | 1 | 1.1063e+02 | 5.2894e+02 |
| 147 | 148 | 149 | 1 | 1.1220e+02 | 5.8442e+02 |
| 147 | 148 | 151 | 1 | 1.2311e+02 | 5.6928e+02 |
| 147 | 163 | 160 | 1 | 1.1063e+02 | 5.2894e+02 |
| 147 | 163 | 165 | 1 | 1.1213e+02 | 5.5103e+02 |
| 148 | 147 | 163 | 1 | 1.1053e+02 | 5.3379e+02 |
| 149 | 148 | 151 | 1 | 1.2288e+02 | 6.4752e+02 |
| 154 | 157 | 160 | 1 | 1.1063e+02 | 5.2894e+02 |
| 157 | 160 | 163 | 1 | 1.1063e+02 | 5.2894e+02 |
| 160 | 163 | 165 | 1 | 1.1213e+02 | 5.5103e+02 |
| 163 | 165 | 167 | 1 | 1.2135e+02 | 5.3488e+02 |
| 165 | 167 | 168 | 1 | 1.2203e+02 | 6.3455e+02 |
| 165 | 167 | 169 | 1 | 1.1515e+02 | 5.6785e+02 |
| 167 | 169 | 171 | 1 | 1.1053e+02 | 5.3379e+02 |
| 168 | 167 | 169 | 1 | 1.2311e+02 | 5.6928e+02 |
| 169 | 171 | 174 | 1 | 1.1192e+02 | 5.3195e+02 |
| 171 | 174 | 175 | 1 | 1.1945e+02 | 5.4233e+02 |
| 171 | 174 | 180 | 1 | 1.2643e+02 | 5.1739e+02 |
| 174 | 175 | 177 | 1 | 1.0942e+02 | 6.1011e+02 |
| 174 | 180 | 179 | 1 | 1.2010e+02 | 5.5220e+02 |
| 174 | 180 | 181 | 1 | 1.2010e+02 | 5.5220e+02 |
| 175 | 174 | 180 | 1 | 1.1351e+02 | 5.7095e+02 |
| 175 | 177 | 179 | 1 | 1.1315e+02 | 5.7287e+02 |
| 177 | 179 | 180 | 1 | 1.1834e+02 | 5.8752e+02 |
| 177 | 179 | 187 | 1 | 1.1834e+02 | 5.8752e+02 |
| 179 | 180 | 181 | 1 | 1.1997e+02 | 5.6216e+02 |
| 179 | 187 | 185 | 1 | 1.1997e+02 | 5.6216e+02 |
| 180 | 179 | 187 | 1 | 1.1997e+02 | 5.6216e+02 |
| 180 | 181 | 183 | 1 | 1.1997e+02 | 5.6216e+02 |
| 181 | 183 | 185 | 1 | 1.1997e+02 | 5.6216e+02 |
| 183 | 185 | 187 | 1 | 1.1997e+02 | 5.6216e+02 |

[ dihedrals ]

| i  | j  | k  | l  | func | C0       | ...     | C5        |         |         |         |         |   |
|----|----|----|----|------|----------|---------|-----------|---------|---------|---------|---------|---|
| 1  | 2  | 3  | 6  | 3    | 30.33400 | 0.00000 | -30.33400 | 0.00000 | 0.00000 | 0.00000 | 0.00000 | ; |
| 1  | 9  | 10 | 13 | 3    | 2.51040  | 0.00000 | -2.51040  | 0.00000 | 0.00000 | 0.00000 | 0.00000 | ; |
| 2  | 3  | 4  | 5  | 3    | 30.33400 | 0.00000 | -30.33400 | 0.00000 | 0.00000 | 0.00000 | 0.00000 | ; |
| 8  | 1  | 2  | 3  | 3    | 30.33400 | 0.00000 | -30.33400 | 0.00000 | 0.00000 | 0.00000 | 0.00000 | ; |
| 4  | 3  | 2  | 7  | 3    | 30.33400 | 0.00000 | -30.33400 | 0.00000 | 0.00000 | 0.00000 | 0.00000 | ; |
| 5  | 4  | 3  | 6  | 3    | 30.33400 | 0.00000 | -30.33400 | 0.00000 | 0.00000 | 0.00000 | 0.00000 | ; |
| 5  | 4  | 14 | 9  | 3    | 30.33400 | 0.00000 | -30.33400 | 0.00000 | 0.00000 | 0.00000 | 0.00000 | ; |
| 5  | 4  | 14 | 15 | 3    | 30.33400 | 0.00000 | -30.33400 | 0.00000 | 0.00000 | 0.00000 | 0.00000 | ; |
| 6  | 3  | 2  | 7  | 3    | 30.33400 | 0.00000 | -30.33400 | 0.00000 | 0.00000 | 0.00000 | 0.00000 | ; |
| 6  | 3  | 4  | 14 | 3    | 30.33400 | 0.00000 | -30.33400 | 0.00000 | 0.00000 | 0.00000 | 0.00000 | ; |
| 8  | 1  | 2  | 7  | 3    | 30.33400 | 0.00000 | -30.33400 | 0.00000 | 0.00000 | 0.00000 | 0.00000 | ; |
| 9  | 1  | 2  | 7  | 3    | 30.33400 | 0.00000 | -30.33400 | 0.00000 | 0.00000 | 0.00000 | 0.00000 | ; |
| 8  | 1  | 9  | 10 | 3    | 30.33400 | 0.00000 | -30.33400 | 0.00000 | 0.00000 | 0.00000 | 0.00000 | ; |
| 8  | 1  | 9  | 14 | 3    | 30.33400 | 0.00000 | -30.33400 | 0.00000 | 0.00000 | 0.00000 | 0.00000 | ; |
| 9  | 10 | 11 | 12 | 3    | 14.22560 | 0.00000 | -14.22560 | 0.00000 | 0.00000 | 0.00000 | 0.00000 | ; |
| 11 | 15 | 16 | 17 | 3    | 0.00000  | 0.00000 | 0.00000   | 0.00000 | 0.00000 | 0.00000 | 0.00000 | ; |
| 11 | 15 | 16 | 18 | 3    | 0.00000  | 0.00000 | 0.00000   | 0.00000 | 0.00000 | 0.00000 | 0.00000 | ; |
| 12 | 11 | 10 | 13 | 3    | 14.22560 | 0.00000 | -14.22560 | 0.00000 | 0.00000 | 0.00000 | 0.00000 | ; |
| 12 | 11 | 15 | 14 | 3    | 33.47200 | 0.00000 | -33.47200 | 0.00000 | 0.00000 | 0.00000 | 0.00000 | ; |
| 12 | 11 | 15 | 16 | 3    | 33.47200 | 0.00000 | -33.47200 | 0.00000 | 0.00000 | 0.00000 | 0.00000 | ; |
| 13 | 10 | 9  | 14 | 3    | 2.51040  | 0.00000 | -2.51040  | 0.00000 | 0.00000 | 0.00000 | 0.00000 | ; |















|     |    |   |     |     |     |          |           |
|-----|----|---|-----|-----|-----|----------|-----------|
| 30  | c3 | 1 | MOL | C21 | 30  | 0.69685  | 12.000000 |
| 31  | c3 | 1 | MOL | C22 | 31  | 0.11793  | 12.000000 |
| 32  | c3 | 1 | MOL | C23 | 32  | -0.11613 | 12.000000 |
| 33  | c3 | 1 | MOL | C24 | 33  | 0.14940  | 12.000000 |
| 34  | c3 | 1 | MOL | C25 | 34  | -0.23588 | 12.000000 |
| 35  | c  | 1 | MOL | C26 | 35  | 0.84521  | 12.000000 |
| 36  | c3 | 1 | MOL | C27 | 36  | -0.03162 | 12.000000 |
| 37  | c  | 1 | MOL | C28 | 37  | 0.65821  | 12.000000 |
| 38  | o  | 1 | MOL | O6  | 38  | -0.59402 | 16.000000 |
| 39  | n  | 1 | MOL | N5  | 39  | -0.80485 | 14.000000 |
| 40  | c3 | 1 | MOL | C29 | 40  | 0.54224  | 12.000000 |
| 41  | c3 | 1 | MOL | C30 | 41  | -0.07259 | 12.000000 |
| 42  | cc | 1 | MOL | C31 | 42  | -0.27795 | 12.000000 |
| 43  | cd | 1 | MOL | C32 | 43  | -0.00954 | 12.000000 |
| 44  | na | 1 | MOL | N6  | 44  | -0.53217 | 14.000000 |
| 45  | ca | 1 | MOL | C33 | 45  | 0.28712  | 12.000000 |
| 46  | ca | 1 | MOL | C34 | 46  | 0.19418  | 12.000000 |
| 47  | ca | 1 | MOL | C35 | 47  | -0.18687 | 12.000000 |
| 48  | ca | 1 | MOL | C36 | 48  | -0.22699 | 12.000000 |
| 49  | ca | 1 | MOL | C37 | 49  | -0.13743 | 12.000000 |
| 50  | ca | 1 | MOL | C38 | 50  | -0.33869 | 12.000000 |
| 51  | c  | 1 | MOL | C39 | 51  | 0.57875  | 12.000000 |
| 52  | o  | 1 | MOL | O7  | 52  | -0.61087 | 16.000000 |
| 53  | n  | 1 | MOL | N7  | 53  | -0.87894 | 14.000000 |
| 54  | c3 | 1 | MOL | C40 | 54  | 0.69685  | 12.000000 |
| 55  | c3 | 1 | MOL | C41 | 55  | 0.11793  | 12.000000 |
| 56  | c3 | 1 | MOL | C42 | 56  | -0.11613 | 12.000000 |
| 57  | c3 | 1 | MOL | C43 | 57  | 0.14940  | 12.000000 |
| 58  | c3 | 1 | MOL | C44 | 58  | -0.23588 | 12.000000 |
| 59  | c  | 1 | MOL | C45 | 59  | 0.84521  | 12.000000 |
| 60  | o  | 1 | MOL | O8  | 60  | -0.77692 | 16.000000 |
| 61  | o  | 1 | MOL | O9  | 61  | -0.77692 | 16.000000 |
| 62  | c3 | 1 | MOL | C46 | 62  | -0.03162 | 12.000000 |
| 63  | c  | 1 | MOL | C47 | 63  | 0.65821  | 12.000000 |
| 64  | o  | 1 | MOL | O10 | 64  | -0.59402 | 16.000000 |
| 65  | n  | 1 | MOL | N8  | 65  | -0.80485 | 14.000000 |
| 66  | c3 | 1 | MOL | C48 | 66  | 0.54224  | 12.000000 |
| 67  | c3 | 1 | MOL | C49 | 67  | -0.07259 | 12.000000 |
| 68  | cc | 1 | MOL | C50 | 68  | -0.27795 | 12.000000 |
| 69  | cd | 1 | MOL | C51 | 69  | -0.00954 | 12.000000 |
| 70  | na | 1 | MOL | N9  | 70  | -0.53217 | 14.000000 |
| 71  | ca | 1 | MOL | C52 | 71  | 0.28712  | 12.000000 |
| 72  | ca | 1 | MOL | C53 | 72  | 0.19418  | 12.000000 |
| 73  | ca | 1 | MOL | C54 | 73  | -0.18687 | 12.000000 |
| 74  | ca | 1 | MOL | C55 | 74  | -0.22699 | 12.000000 |
| 75  | ca | 1 | MOL | C56 | 75  | -0.13743 | 12.000000 |
| 76  | ca | 1 | MOL | C57 | 76  | -0.33869 | 12.000000 |
| 77  | c  | 1 | MOL | C58 | 77  | 0.57875  | 12.000000 |
| 78  | o  | 1 | MOL | O11 | 78  | -0.61087 | 16.000000 |
| 79  | n  | 1 | MOL | N10 | 79  | -0.87894 | 14.000000 |
| 80  | c3 | 1 | MOL | C59 | 80  | 0.69685  | 12.000000 |
| 81  | c3 | 1 | MOL | C60 | 81  | 0.11793  | 12.000000 |
| 82  | c3 | 1 | MOL | C61 | 82  | -0.11613 | 12.000000 |
| 83  | c3 | 1 | MOL | C62 | 83  | 0.14940  | 12.000000 |
| 84  | c3 | 1 | MOL | C63 | 84  | -0.23588 | 12.000000 |
| 85  | c  | 1 | MOL | C64 | 85  | 0.84521  | 12.000000 |
| 86  | c3 | 1 | MOL | C65 | 86  | -0.03162 | 12.000000 |
| 87  | c  | 1 | MOL | C66 | 87  | 0.65821  | 12.000000 |
| 88  | o  | 1 | MOL | O12 | 88  | -0.59402 | 16.000000 |
| 89  | n  | 1 | MOL | N11 | 89  | -0.80485 | 14.000000 |
| 90  | c3 | 1 | MOL | C67 | 90  | 0.54224  | 12.000000 |
| 91  | c3 | 1 | MOL | C68 | 91  | -0.07259 | 12.000000 |
| 92  | cc | 1 | MOL | C69 | 92  | -0.27795 | 12.000000 |
| 93  | cd | 1 | MOL | C70 | 93  | -0.00954 | 12.000000 |
| 94  | na | 1 | MOL | N12 | 94  | -0.53217 | 14.000000 |
| 95  | ca | 1 | MOL | C71 | 95  | 0.28712  | 12.000000 |
| 96  | ca | 1 | MOL | C72 | 96  | 0.19418  | 12.000000 |
| 97  | ca | 1 | MOL | C73 | 97  | -0.18687 | 12.000000 |
| 98  | ca | 1 | MOL | C74 | 98  | -0.22699 | 12.000000 |
| 99  | ca | 1 | MOL | C75 | 99  | -0.13743 | 12.000000 |
| 100 | ca | 1 | MOL | C76 | 100 | -0.33869 | 12.000000 |
| 101 | o  | 1 | MOL | O13 | 101 | -0.77692 | 16.000000 |
| 102 | o  | 1 | MOL | O14 | 102 | -0.77692 | 16.000000 |
| 103 | o  | 1 | MOL | O15 | 103 | -0.77692 | 16.000000 |
| 104 | o  | 1 | MOL | O16 | 104 | -0.77692 | 16.000000 |
| 105 | h1 | 1 | MOL | H1  | 105 | -0.00142 | 1.000000  |
| 106 | hn | 1 | MOL | H2  | 106 | 0.41341  | 1.000000  |
| 107 | hc | 1 | MOL | H3  | 107 | 0.02251  | 1.000000  |
| 108 | hc | 1 | MOL | H4  | 108 | 0.06142  | 1.000000  |
| 109 | h1 | 1 | MOL | H5  | 109 | -0.07891 | 1.000000  |
| 110 | hn | 1 | MOL | H6  | 110 | 0.37592  | 1.000000  |
| 111 | hc | 1 | MOL | H7  | 111 | -0.05800 | 1.000000  |
| 112 | hc | 1 | MOL | H8  | 112 | -0.05800 | 1.000000  |
| 113 | hc | 1 | MOL | H9  | 113 | -0.01891 | 1.000000  |
| 114 | hc | 1 | MOL | H10 | 114 | -0.01891 | 1.000000  |
| 115 | hc | 1 | MOL | H11 | 115 | -0.06332 | 1.000000  |
| 116 | hc | 1 | MOL | H12 | 116 | -0.06332 | 1.000000  |
| 117 | hc | 1 | MOL | H13 | 117 | 0.02049  | 1.000000  |
| 118 | hc | 1 | MOL | H14 | 118 | 0.02049  | 1.000000  |
| 119 | h4 | 1 | MOL | H15 | 119 | 0.14034  | 1.000000  |
| 120 | hn | 1 | MOL | H16 | 120 | 0.35889  | 1.000000  |
| 121 | ha | 1 | MOL | H17 | 121 | 0.13930  | 1.000000  |
| 122 | ha | 1 | MOL | H18 | 122 | 0.11665  | 1.000000  |
| 123 | ha | 1 | MOL | H19 | 123 | 0.09061  | 1.000000  |
| 124 | ha | 1 | MOL | H20 | 124 | 0.13926  | 1.000000  |
| 125 | hn | 1 | MOL | H21 | 125 | 0.37592  | 1.000000  |
| 126 | h1 | 1 | MOL | H22 | 126 | -0.07891 | 1.000000  |
| 127 | hc | 1 | MOL | H23 | 127 | -0.05800 | 1.000000  |
| 128 | hc | 1 | MOL | H24 | 128 | -0.05800 | 1.000000  |
| 129 | hc | 1 | MOL | H25 | 129 | -0.01891 | 1.000000  |
| 130 | hc | 1 | MOL | H26 | 130 | -0.01891 | 1.000000  |
| 131 | hc | 1 | MOL | H27 | 131 | -0.06332 | 1.000000  |
| 132 | hc | 1 | MOL | H28 | 132 | -0.06332 | 1.000000  |
| 133 | hc | 1 | MOL | H29 | 133 | 0.06142  | 1.000000  |
| 134 | hc | 1 | MOL | H30 | 134 | 0.02251  | 1.000000  |
| 135 | hn | 1 | MOL | H31 | 135 | 0.41341  | 1.000000  |
| 136 | h1 | 1 | MOL | H32 | 136 | -0.00142 | 1.000000  |
| 137 | hc | 1 | MOL | H33 | 137 | 0.02049  | 1.000000  |
| 138 | hc | 1 | MOL | H34 | 138 | 0.02049  | 1.000000  |
| 139 | h4 | 1 | MOL | H35 | 139 | 0.14034  | 1.000000  |
| 140 | hn | 1 | MOL | H36 | 140 | 0.35889  | 1.000000  |
| 141 | ha | 1 | MOL | H37 | 141 | 0.13930  | 1.000000  |
| 142 | ha | 1 | MOL | H38 | 142 | 0.11665  | 1.000000  |

|     |    |   |     |     |     |          |          |
|-----|----|---|-----|-----|-----|----------|----------|
| 143 | ha | 1 | MOL | H39 | 143 | 0.09061  | 1.000000 |
| 144 | ha | 1 | MOL | H40 | 144 | 0.13926  | 1.000000 |
| 145 | hn | 1 | MOL | H41 | 145 | 0.37592  | 1.000000 |
| 146 | hl | 1 | MOL | H42 | 146 | -0.07891 | 1.000000 |
| 147 | hc | 1 | MOL | H43 | 147 | -0.05800 | 1.000000 |
| 148 | hc | 1 | MOL | H44 | 148 | -0.05800 | 1.000000 |
| 149 | hc | 1 | MOL | H45 | 149 | -0.01891 | 1.000000 |
| 150 | hc | 1 | MOL | H46 | 150 | -0.01891 | 1.000000 |
| 151 | hc | 1 | MOL | H47 | 151 | -0.06332 | 1.000000 |
| 152 | hc | 1 | MOL | H48 | 152 | -0.06332 | 1.000000 |
| 153 | hc | 1 | MOL | H49 | 153 | 0.06142  | 1.000000 |
| 154 | hc | 1 | MOL | H50 | 154 | 0.02251  | 1.000000 |
| 155 | hn | 1 | MOL | H51 | 155 | 0.41341  | 1.000000 |
| 156 | hl | 1 | MOL | H52 | 156 | -0.00142 | 1.000000 |
| 157 | hc | 1 | MOL | H53 | 157 | 0.02049  | 1.000000 |
| 158 | hc | 1 | MOL | H54 | 158 | 0.02049  | 1.000000 |
| 159 | h4 | 1 | MOL | H55 | 159 | 0.14034  | 1.000000 |
| 160 | hn | 1 | MOL | H56 | 160 | 0.35889  | 1.000000 |
| 161 | ha | 1 | MOL | H57 | 161 | 0.13930  | 1.000000 |
| 162 | ha | 1 | MOL | H58 | 162 | 0.11665  | 1.000000 |
| 163 | ha | 1 | MOL | H59 | 163 | 0.09061  | 1.000000 |
| 164 | ha | 1 | MOL | H60 | 164 | 0.13926  | 1.000000 |
| 165 | hn | 1 | MOL | H61 | 165 | 0.37592  | 1.000000 |
| 166 | hl | 1 | MOL | H62 | 166 | -0.07891 | 1.000000 |
| 167 | hc | 1 | MOL | H63 | 167 | -0.05800 | 1.000000 |
| 168 | hc | 1 | MOL | H64 | 168 | -0.05800 | 1.000000 |
| 169 | hc | 1 | MOL | H65 | 169 | -0.01891 | 1.000000 |
| 170 | hc | 1 | MOL | H66 | 170 | -0.01891 | 1.000000 |
| 171 | hc | 1 | MOL | H67 | 171 | -0.06332 | 1.000000 |
| 172 | hc | 1 | MOL | H68 | 172 | -0.06332 | 1.000000 |
| 173 | hc | 1 | MOL | H69 | 173 | 0.06142  | 1.000000 |
| 174 | hc | 1 | MOL | H70 | 174 | 0.02251  | 1.000000 |
| 175 | hn | 1 | MOL | H71 | 175 | 0.41341  | 1.000000 |
| 176 | hl | 1 | MOL | H72 | 176 | -0.00142 | 1.000000 |
| 177 | hc | 1 | MOL | H73 | 177 | 0.02049  | 1.000000 |
| 178 | hc | 1 | MOL | H74 | 178 | 0.02049  | 1.000000 |
| 179 | h4 | 1 | MOL | H75 | 179 | 0.14034  | 1.000000 |
| 180 | hn | 1 | MOL | H76 | 180 | 0.35889  | 1.000000 |
| 181 | ha | 1 | MOL | H77 | 181 | 0.13930  | 1.000000 |
| 182 | ha | 1 | MOL | H78 | 182 | 0.11665  | 1.000000 |
| 183 | ha | 1 | MOL | H79 | 183 | 0.09061  | 1.000000 |
| 184 | ha | 1 | MOL | H80 | 184 | 0.13926  | 1.000000 |

[ bonds ]

| ; | ai | aj  | funct | r          | k          |
|---|----|-----|-------|------------|------------|
|   | 1  | 105 | 1     | 1.0970e-01 | 2.7665e+05 |
|   | 2  | 106 | 1     | 1.0130e-01 | 3.3740e+05 |
|   | 4  | 107 | 1     | 1.0970e-01 | 2.7665e+05 |
|   | 5  | 108 | 1     | 1.0970e-01 | 2.7665e+05 |
|   | 6  | 109 | 1     | 1.0970e-01 | 2.7665e+05 |
|   | 7  | 110 | 1     | 1.0130e-01 | 3.3740e+05 |
|   | 10 | 111 | 1     | 1.0970e-01 | 2.7665e+05 |
|   | 10 | 112 | 1     | 1.0970e-01 | 2.7665e+05 |
|   | 11 | 113 | 1     | 1.0970e-01 | 2.7665e+05 |
|   | 11 | 114 | 1     | 1.0970e-01 | 2.7665e+05 |
|   | 12 | 115 | 1     | 1.0970e-01 | 2.7665e+05 |
|   | 12 | 116 | 1     | 1.0970e-01 | 2.7665e+05 |
|   | 17 | 117 | 1     | 1.0970e-01 | 2.7665e+05 |
|   | 17 | 118 | 1     | 1.0970e-01 | 2.7665e+05 |
|   | 19 | 119 | 1     | 1.0820e-01 | 2.9455e+05 |
|   | 20 | 120 | 1     | 1.0100e-01 | 3.4175e+05 |
|   | 23 | 121 | 1     | 1.0860e-01 | 2.8937e+05 |
|   | 24 | 122 | 1     | 1.0860e-01 | 2.8937e+05 |
|   | 25 | 123 | 1     | 1.0860e-01 | 2.8937e+05 |
|   | 26 | 124 | 1     | 1.0860e-01 | 2.8937e+05 |
|   | 29 | 125 | 1     | 1.0130e-01 | 3.3740e+05 |
|   | 30 | 126 | 1     | 1.0970e-01 | 2.7665e+05 |
|   | 31 | 127 | 1     | 1.0970e-01 | 2.7665e+05 |
|   | 31 | 128 | 1     | 1.0970e-01 | 2.7665e+05 |
|   | 32 | 129 | 1     | 1.0970e-01 | 2.7665e+05 |
|   | 32 | 130 | 1     | 1.0970e-01 | 2.7665e+05 |
|   | 33 | 131 | 1     | 1.0970e-01 | 2.7665e+05 |
|   | 33 | 132 | 1     | 1.0970e-01 | 2.7665e+05 |
|   | 34 | 133 | 1     | 1.0970e-01 | 2.7665e+05 |
|   | 36 | 134 | 1     | 1.0970e-01 | 2.7665e+05 |
|   | 39 | 135 | 1     | 1.0130e-01 | 3.3740e+05 |
|   | 40 | 136 | 1     | 1.0970e-01 | 2.7665e+05 |
|   | 41 | 137 | 1     | 1.0970e-01 | 2.7665e+05 |
|   | 41 | 138 | 1     | 1.0970e-01 | 2.7665e+05 |
|   | 43 | 139 | 1     | 1.0820e-01 | 2.9455e+05 |
|   | 44 | 140 | 1     | 1.0100e-01 | 3.4175e+05 |
|   | 47 | 141 | 1     | 1.0860e-01 | 2.8937e+05 |
|   | 48 | 142 | 1     | 1.0860e-01 | 2.8937e+05 |
|   | 49 | 143 | 1     | 1.0860e-01 | 2.8937e+05 |
|   | 50 | 144 | 1     | 1.0860e-01 | 2.8937e+05 |
|   | 53 | 145 | 1     | 1.0130e-01 | 3.3740e+05 |
|   | 54 | 146 | 1     | 1.0970e-01 | 2.7665e+05 |
|   | 55 | 147 | 1     | 1.0970e-01 | 2.7665e+05 |
|   | 55 | 148 | 1     | 1.0970e-01 | 2.7665e+05 |
|   | 56 | 149 | 1     | 1.0970e-01 | 2.7665e+05 |
|   | 56 | 150 | 1     | 1.0970e-01 | 2.7665e+05 |
|   | 57 | 151 | 1     | 1.0970e-01 | 2.7665e+05 |
|   | 57 | 152 | 1     | 1.0970e-01 | 2.7665e+05 |
|   | 58 | 153 | 1     | 1.0970e-01 | 2.7665e+05 |
|   | 62 | 154 | 1     | 1.0970e-01 | 2.7665e+05 |
|   | 65 | 155 | 1     | 1.0130e-01 | 3.3740e+05 |
|   | 66 | 156 | 1     | 1.0970e-01 | 2.7665e+05 |
|   | 67 | 157 | 1     | 1.0970e-01 | 2.7665e+05 |
|   | 67 | 158 | 1     | 1.0970e-01 | 2.7665e+05 |
|   | 69 | 159 | 1     | 1.0820e-01 | 2.9455e+05 |
|   | 70 | 160 | 1     | 1.0100e-01 | 3.4175e+05 |
|   | 73 | 161 | 1     | 1.0860e-01 | 2.8937e+05 |
|   | 74 | 162 | 1     | 1.0860e-01 | 2.8937e+05 |
|   | 75 | 163 | 1     | 1.0860e-01 | 2.8937e+05 |
|   | 76 | 164 | 1     | 1.0860e-01 | 2.8937e+05 |
|   | 79 | 165 | 1     | 1.0130e-01 | 3.3740e+05 |
|   | 80 | 166 | 1     | 1.0970e-01 | 2.7665e+05 |
|   | 81 | 167 | 1     | 1.0970e-01 | 2.7665e+05 |
|   | 81 | 168 | 1     | 1.0970e-01 | 2.7665e+05 |
|   | 82 | 169 | 1     | 1.0970e-01 | 2.7665e+05 |
|   | 82 | 170 | 1     | 1.0970e-01 | 2.7665e+05 |
|   | 83 | 171 | 1     | 1.0970e-01 | 2.7665e+05 |
|   | 83 | 172 | 1     | 1.0970e-01 | 2.7665e+05 |

|     |     |   |            |            |
|-----|-----|---|------------|------------|
| 84  | 173 | 1 | 1.0970e-01 | 2.7665e+05 |
| 86  | 174 | 1 | 1.0970e-01 | 2.7665e+05 |
| 89  | 175 | 1 | 1.0130e-01 | 3.3740e+05 |
| 90  | 176 | 1 | 1.0970e-01 | 2.7665e+05 |
| 91  | 177 | 1 | 1.0970e-01 | 2.7665e+05 |
| 91  | 178 | 1 | 1.0970e-01 | 2.7665e+05 |
| 93  | 179 | 1 | 1.0820e-01 | 2.9455e+05 |
| 94  | 180 | 1 | 1.0100e-01 | 3.4175e+05 |
| 97  | 181 | 1 | 1.0860e-01 | 2.8937e+05 |
| 98  | 182 | 1 | 1.0860e-01 | 2.8937e+05 |
| 99  | 183 | 1 | 1.0860e-01 | 2.8937e+05 |
| 100 | 184 | 1 | 1.0860e-01 | 2.8937e+05 |
| 1   | 2   | 1 | 1.4620e-01 | 2.7506e+05 |
| 1   | 17  | 1 | 1.5380e-01 | 2.5179e+05 |
| 1   | 27  | 1 | 1.5240e-01 | 2.6192e+05 |
| 2   | 3   | 1 | 1.3790e-01 | 3.5782e+05 |
| 3   | 4   | 1 | 1.5240e-01 | 2.6192e+05 |
| 3   | 16  | 1 | 1.2180e-01 | 5.3363e+05 |
| 4   | 5   | 1 | 1.5380e-01 | 2.5179e+05 |
| 4   | 12  | 1 | 1.5380e-01 | 2.5179e+05 |
| 5   | 6   | 1 | 1.5380e-01 | 2.5179e+05 |
| 5   | 13  | 1 | 1.5240e-01 | 2.6192e+05 |
| 6   | 7   | 1 | 1.4620e-01 | 2.7506e+05 |
| 6   | 10  | 1 | 1.5380e-01 | 2.5179e+05 |
| 7   | 8   | 1 | 1.3790e-01 | 3.5782e+05 |
| 8   | 9   | 1 | 1.2180e-01 | 5.3363e+05 |
| 8   | 90  | 1 | 1.5240e-01 | 2.6192e+05 |
| 10  | 11  | 1 | 1.5380e-01 | 2.5179e+05 |
| 11  | 12  | 1 | 1.5380e-01 | 2.5179e+05 |
| 13  | 14  | 1 | 1.2180e-01 | 5.3363e+05 |
| 13  | 15  | 1 | 1.2180e-01 | 5.3363e+05 |
| 17  | 18  | 1 | 1.5020e-01 | 2.8016e+05 |
| 18  | 19  | 1 | 1.3730e-01 | 4.1915e+05 |
| 18  | 22  | 1 | 1.4560e-01 | 3.2225e+05 |
| 19  | 20  | 1 | 1.3800e-01 | 3.5631e+05 |
| 20  | 21  | 1 | 1.3840e-01 | 3.5187e+05 |
| 21  | 22  | 1 | 1.3980e-01 | 3.8585e+05 |
| 21  | 26  | 1 | 1.3980e-01 | 3.8585e+05 |
| 22  | 23  | 1 | 1.3980e-01 | 3.8585e+05 |
| 23  | 24  | 1 | 1.3980e-01 | 3.8585e+05 |
| 24  | 25  | 1 | 1.3980e-01 | 3.8585e+05 |
| 25  | 26  | 1 | 1.3980e-01 | 3.8585e+05 |
| 27  | 28  | 1 | 1.2180e-01 | 5.3363e+05 |
| 27  | 29  | 1 | 1.3790e-01 | 3.5782e+05 |
| 29  | 30  | 1 | 1.4620e-01 | 2.7506e+05 |
| 30  | 31  | 1 | 1.5380e-01 | 2.5179e+05 |
| 30  | 34  | 1 | 1.5380e-01 | 2.5179e+05 |
| 31  | 32  | 1 | 1.5380e-01 | 2.5179e+05 |
| 32  | 33  | 1 | 1.5380e-01 | 2.5179e+05 |
| 33  | 36  | 1 | 1.5380e-01 | 2.5179e+05 |
| 34  | 35  | 1 | 1.5240e-01 | 2.6192e+05 |
| 34  | 36  | 1 | 1.5380e-01 | 2.5179e+05 |
| 35  | 101 | 1 | 1.2180e-01 | 5.3363e+05 |
| 35  | 103 | 1 | 1.2180e-01 | 5.3363e+05 |
| 36  | 37  | 1 | 1.5240e-01 | 2.6192e+05 |
| 37  | 38  | 1 | 1.2180e-01 | 5.3363e+05 |
| 37  | 39  | 1 | 1.3790e-01 | 3.5782e+05 |
| 39  | 40  | 1 | 1.4620e-01 | 2.7506e+05 |
| 40  | 41  | 1 | 1.5380e-01 | 2.5179e+05 |
| 40  | 51  | 1 | 1.5240e-01 | 2.6192e+05 |
| 41  | 42  | 1 | 1.5020e-01 | 2.8016e+05 |
| 42  | 43  | 1 | 1.3730e-01 | 4.1915e+05 |
| 42  | 46  | 1 | 1.4560e-01 | 3.2225e+05 |
| 43  | 44  | 1 | 1.3800e-01 | 3.5631e+05 |
| 44  | 45  | 1 | 1.3840e-01 | 3.5187e+05 |
| 45  | 46  | 1 | 1.3980e-01 | 3.8585e+05 |
| 45  | 50  | 1 | 1.3980e-01 | 3.8585e+05 |
| 46  | 47  | 1 | 1.3980e-01 | 3.8585e+05 |
| 47  | 48  | 1 | 1.3980e-01 | 3.8585e+05 |
| 48  | 49  | 1 | 1.3980e-01 | 3.8585e+05 |
| 49  | 50  | 1 | 1.3980e-01 | 3.8585e+05 |
| 51  | 52  | 1 | 1.2180e-01 | 5.3363e+05 |
| 51  | 53  | 1 | 1.3790e-01 | 3.5782e+05 |
| 53  | 54  | 1 | 1.4620e-01 | 2.7506e+05 |
| 54  | 55  | 1 | 1.5380e-01 | 2.5179e+05 |
| 54  | 58  | 1 | 1.5380e-01 | 2.5179e+05 |
| 55  | 56  | 1 | 1.5380e-01 | 2.5179e+05 |
| 56  | 57  | 1 | 1.5380e-01 | 2.5179e+05 |
| 57  | 62  | 1 | 1.5380e-01 | 2.5179e+05 |
| 58  | 59  | 1 | 1.5240e-01 | 2.6192e+05 |
| 58  | 62  | 1 | 1.5380e-01 | 2.5179e+05 |
| 59  | 60  | 1 | 1.2180e-01 | 5.3363e+05 |
| 59  | 61  | 1 | 1.2180e-01 | 5.3363e+05 |
| 62  | 63  | 1 | 1.5240e-01 | 2.6192e+05 |
| 63  | 64  | 1 | 1.2180e-01 | 5.3363e+05 |
| 63  | 65  | 1 | 1.3790e-01 | 3.5782e+05 |
| 65  | 66  | 1 | 1.4620e-01 | 2.7506e+05 |
| 66  | 67  | 1 | 1.5380e-01 | 2.5179e+05 |
| 66  | 77  | 1 | 1.5240e-01 | 2.6192e+05 |
| 67  | 68  | 1 | 1.5020e-01 | 2.8016e+05 |
| 68  | 69  | 1 | 1.3730e-01 | 4.1915e+05 |
| 68  | 72  | 1 | 1.4560e-01 | 3.2225e+05 |
| 69  | 70  | 1 | 1.3800e-01 | 3.5631e+05 |
| 70  | 71  | 1 | 1.3840e-01 | 3.5187e+05 |
| 71  | 72  | 1 | 1.3980e-01 | 3.8585e+05 |
| 71  | 76  | 1 | 1.3980e-01 | 3.8585e+05 |
| 72  | 73  | 1 | 1.3980e-01 | 3.8585e+05 |
| 73  | 74  | 1 | 1.3980e-01 | 3.8585e+05 |
| 74  | 75  | 1 | 1.3980e-01 | 3.8585e+05 |
| 75  | 76  | 1 | 1.3980e-01 | 3.8585e+05 |
| 77  | 78  | 1 | 1.2180e-01 | 5.3363e+05 |
| 77  | 79  | 1 | 1.3790e-01 | 3.5782e+05 |
| 79  | 80  | 1 | 1.4620e-01 | 2.7506e+05 |
| 80  | 81  | 1 | 1.5380e-01 | 2.5179e+05 |
| 80  | 84  | 1 | 1.5380e-01 | 2.5179e+05 |
| 81  | 82  | 1 | 1.5380e-01 | 2.5179e+05 |
| 82  | 83  | 1 | 1.5380e-01 | 2.5179e+05 |
| 83  | 86  | 1 | 1.5380e-01 | 2.5179e+05 |
| 84  | 85  | 1 | 1.5240e-01 | 2.6192e+05 |
| 84  | 86  | 1 | 1.5380e-01 | 2.5179e+05 |
| 85  | 102 | 1 | 1.2180e-01 | 5.3363e+05 |
| 85  | 104 | 1 | 1.2180e-01 | 5.3363e+05 |
| 86  | 87  | 1 | 1.5240e-01 | 2.6192e+05 |



|    |     |   |            |            |
|----|-----|---|------------|------------|
| 87 | 88  | 1 | 1.2180e-01 | 5.3363e+05 |
| 87 | 89  | 1 | 1.3790e-01 | 3.5782e+05 |
| 89 | 90  | 1 | 1.4620e-01 | 2.7506e+05 |
| 90 | 91  | 1 | 1.5380e-01 | 2.5179e+05 |
| 91 | 92  | 1 | 1.5020e-01 | 2.8016e+05 |
| 92 | 93  | 1 | 1.3730e-01 | 4.1915e+05 |
| 92 | 96  | 1 | 1.4560e-01 | 3.2225e+05 |
| 93 | 94  | 1 | 1.3800e-01 | 3.5631e+05 |
| 94 | 95  | 1 | 1.3840e-01 | 3.5187e+05 |
| 95 | 96  | 1 | 1.3980e-01 | 3.8585e+05 |
| 95 | 100 | 1 | 1.3980e-01 | 3.8585e+05 |
| 96 | 97  | 1 | 1.3980e-01 | 3.8585e+05 |
| 97 | 98  | 1 | 1.3980e-01 | 3.8585e+05 |
| 98 | 99  | 1 | 1.3980e-01 | 3.8585e+05 |
| 99 | 100 | 1 | 1.3980e-01 | 3.8585e+05 |

[ pairs ]

| ;   | ai  | aj  | funct |
|-----|-----|-----|-------|
|     | 1   | 125 | 1     |
|     | 2   | 117 | 1     |
|     | 2   | 118 | 1     |
|     | 2   | 107 | 1     |
| 105 | 3   | 3   | 1     |
|     | 3   | 108 | 1     |
|     | 3   | 115 | 1     |
|     | 3   | 116 | 1     |
|     | 4   | 106 | 1     |
|     | 4   | 109 | 1     |
|     | 4   | 113 | 1     |
|     | 4   | 114 | 1     |
|     | 5   | 115 | 1     |
|     | 5   | 116 | 1     |
|     | 5   | 110 | 1     |
|     | 5   | 111 | 1     |
|     | 5   | 112 | 1     |
|     | 6   | 107 | 1     |
|     | 6   | 113 | 1     |
|     | 6   | 114 | 1     |
|     | 7   | 108 | 1     |
|     | 7   | 111 | 1     |
|     | 7   | 112 | 1     |
|     | 7   | 176 | 1     |
|     | 8   | 109 | 1     |
|     | 8   | 175 | 1     |
|     | 8   | 177 | 1     |
|     | 8   | 178 | 1     |
|     | 9   | 110 | 1     |
|     | 9   | 176 | 1     |
| 10  | 108 | 1   |       |
| 10  | 110 | 1   |       |
| 10  | 115 | 1   |       |
| 10  | 116 | 1   |       |
| 11  | 109 | 1   |       |
| 11  | 107 | 1   |       |
| 12  | 108 | 1   |       |
| 12  | 111 | 1   |       |
| 12  | 112 | 1   |       |
| 13  | 107 | 1   |       |
| 13  | 109 | 1   |       |
| 14  | 108 | 1   |       |
| 15  | 108 | 1   |       |
| 16  | 106 | 1   |       |
| 16  | 107 | 1   |       |
| 17  | 106 | 1   |       |
| 17  | 119 | 1   |       |
| 105 | 18  | 1   |       |
| 18  | 120 | 1   |       |
| 18  | 121 | 1   |       |
| 19  | 117 | 1   |       |
| 19  | 118 | 1   |       |
| 20  | 124 | 1   |       |
| 21  | 119 | 1   |       |
| 21  | 121 | 1   |       |
| 21  | 123 | 1   |       |
| 22  | 117 | 1   |       |
| 22  | 118 | 1   |       |
| 22  | 119 | 1   |       |
| 22  | 120 | 1   |       |
| 22  | 124 | 1   |       |
| 22  | 122 | 1   |       |
| 23  | 123 | 1   |       |
| 24  | 124 | 1   |       |
| 25  | 121 | 1   |       |
| 26  | 120 | 1   |       |
| 26  | 122 | 1   |       |
| 27  | 106 | 1   |       |
| 27  | 117 | 1   |       |
| 27  | 118 | 1   |       |
| 27  | 126 | 1   |       |
| 105 | 28  | 1   |       |
| 28  | 125 | 1   |       |
| 105 | 29  | 1   |       |
| 29  | 127 | 1   |       |
| 29  | 128 | 1   |       |
| 29  | 133 | 1   |       |
| 30  | 129 | 1   |       |
| 30  | 130 | 1   |       |
| 30  | 134 | 1   |       |
| 31  | 125 | 1   |       |
| 31  | 133 | 1   |       |
| 31  | 131 | 1   |       |
| 31  | 132 | 1   |       |
| 32  | 126 | 1   |       |
| 32  | 134 | 1   |       |
| 33  | 127 | 1   |       |
| 33  | 128 | 1   |       |
| 33  | 133 | 1   |       |
| 34  | 125 | 1   |       |
| 34  | 127 | 1   |       |
| 34  | 128 | 1   |       |
| 34  | 131 | 1   |       |
| 34  | 132 | 1   |       |
| 35  | 126 | 1   |       |

|    |     |   |
|----|-----|---|
| 35 | 134 | 1 |
| 36 | 129 | 1 |
| 36 | 130 | 1 |
| 36 | 126 | 1 |
| 36 | 135 | 1 |
| 37 | 131 | 1 |
| 37 | 132 | 1 |
| 37 | 133 | 1 |
| 37 | 136 | 1 |
| 38 | 134 | 1 |
| 38 | 135 | 1 |
| 39 | 134 | 1 |
| 39 | 137 | 1 |
| 39 | 138 | 1 |
| 40 | 145 | 1 |
| 41 | 135 | 1 |
| 41 | 139 | 1 |
| 42 | 136 | 1 |
| 42 | 140 | 1 |
| 42 | 141 | 1 |
| 43 | 137 | 1 |
| 43 | 138 | 1 |
| 44 | 144 | 1 |
| 45 | 139 | 1 |
| 45 | 141 | 1 |
| 45 | 143 | 1 |
| 46 | 137 | 1 |
| 46 | 138 | 1 |
| 46 | 139 | 1 |
| 46 | 140 | 1 |
| 46 | 144 | 1 |
| 46 | 142 | 1 |
| 47 | 143 | 1 |
| 48 | 144 | 1 |
| 49 | 141 | 1 |
| 50 | 140 | 1 |
| 50 | 142 | 1 |
| 51 | 135 | 1 |
| 51 | 137 | 1 |
| 51 | 138 | 1 |
| 51 | 146 | 1 |
| 52 | 136 | 1 |
| 52 | 145 | 1 |
| 53 | 136 | 1 |
| 53 | 147 | 1 |
| 53 | 148 | 1 |
| 53 | 153 | 1 |
| 54 | 149 | 1 |
| 54 | 150 | 1 |
| 54 | 154 | 1 |
| 55 | 145 | 1 |
| 55 | 153 | 1 |
| 55 | 151 | 1 |
| 55 | 152 | 1 |
| 56 | 146 | 1 |
| 56 | 154 | 1 |
| 57 | 147 | 1 |
| 57 | 148 | 1 |
| 57 | 153 | 1 |
| 58 | 145 | 1 |
| 58 | 147 | 1 |
| 58 | 148 | 1 |
| 58 | 151 | 1 |
| 58 | 152 | 1 |
| 59 | 146 | 1 |
| 59 | 154 | 1 |
| 60 | 153 | 1 |
| 61 | 153 | 1 |
| 62 | 149 | 1 |
| 62 | 150 | 1 |
| 62 | 146 | 1 |
| 62 | 155 | 1 |
| 63 | 151 | 1 |
| 63 | 152 | 1 |
| 63 | 153 | 1 |
| 63 | 156 | 1 |
| 64 | 154 | 1 |
| 64 | 155 | 1 |
| 65 | 154 | 1 |
| 65 | 157 | 1 |
| 65 | 158 | 1 |
| 66 | 165 | 1 |
| 67 | 155 | 1 |
| 67 | 159 | 1 |
| 68 | 156 | 1 |
| 68 | 160 | 1 |
| 68 | 161 | 1 |
| 69 | 157 | 1 |
| 69 | 158 | 1 |
| 70 | 164 | 1 |
| 71 | 159 | 1 |
| 71 | 161 | 1 |
| 71 | 163 | 1 |
| 72 | 157 | 1 |
| 72 | 158 | 1 |
| 72 | 159 | 1 |
| 72 | 160 | 1 |
| 72 | 164 | 1 |
| 72 | 162 | 1 |
| 73 | 163 | 1 |
| 74 | 164 | 1 |
| 75 | 161 | 1 |
| 76 | 160 | 1 |
| 76 | 162 | 1 |
| 77 | 155 | 1 |
| 77 | 157 | 1 |
| 77 | 158 | 1 |
| 77 | 166 | 1 |
| 78 | 156 | 1 |
| 78 | 165 | 1 |
| 79 | 156 | 1 |
| 79 | 167 | 1 |
| 79 | 168 | 1 |

|     |     |   |
|-----|-----|---|
| 79  | 173 | 1 |
| 80  | 169 | 1 |
| 80  | 170 | 1 |
| 80  | 174 | 1 |
| 81  | 165 | 1 |
| 81  | 173 | 1 |
| 81  | 171 | 1 |
| 81  | 172 | 1 |
| 82  | 166 | 1 |
| 82  | 174 | 1 |
| 83  | 167 | 1 |
| 83  | 168 | 1 |
| 83  | 173 | 1 |
| 84  | 165 | 1 |
| 84  | 167 | 1 |
| 84  | 168 | 1 |
| 84  | 171 | 1 |
| 84  | 172 | 1 |
| 85  | 166 | 1 |
| 85  | 174 | 1 |
| 86  | 169 | 1 |
| 86  | 170 | 1 |
| 86  | 166 | 1 |
| 86  | 175 | 1 |
| 87  | 171 | 1 |
| 87  | 172 | 1 |
| 87  | 173 | 1 |
| 87  | 176 | 1 |
| 88  | 174 | 1 |
| 88  | 175 | 1 |
| 89  | 174 | 1 |
| 89  | 177 | 1 |
| 89  | 178 | 1 |
| 90  | 110 | 1 |
| 91  | 175 | 1 |
| 91  | 179 | 1 |
| 92  | 176 | 1 |
| 92  | 180 | 1 |
| 92  | 181 | 1 |
| 93  | 177 | 1 |
| 93  | 178 | 1 |
| 94  | 184 | 1 |
| 95  | 179 | 1 |
| 95  | 181 | 1 |
| 95  | 183 | 1 |
| 96  | 177 | 1 |
| 96  | 178 | 1 |
| 96  | 179 | 1 |
| 96  | 180 | 1 |
| 96  | 184 | 1 |
| 96  | 182 | 1 |
| 97  | 183 | 1 |
| 98  | 184 | 1 |
| 99  | 181 | 1 |
| 100 | 180 | 1 |
| 100 | 182 | 1 |
| 101 | 133 | 1 |
| 102 | 173 | 1 |
| 103 | 133 | 1 |
| 104 | 173 | 1 |
| 105 | 106 | 1 |
| 105 | 117 | 1 |
| 105 | 118 | 1 |
| 107 | 108 | 1 |
| 107 | 115 | 1 |
| 107 | 116 | 1 |
| 108 | 109 | 1 |
| 109 | 110 | 1 |
| 109 | 111 | 1 |
| 109 | 112 | 1 |
| 111 | 113 | 1 |
| 111 | 114 | 1 |
| 112 | 113 | 1 |
| 112 | 114 | 1 |
| 113 | 115 | 1 |
| 113 | 116 | 1 |
| 114 | 115 | 1 |
| 114 | 116 | 1 |
| 119 | 120 | 1 |
| 121 | 122 | 1 |
| 122 | 123 | 1 |
| 123 | 124 | 1 |
| 125 | 126 | 1 |
| 126 | 127 | 1 |
| 126 | 128 | 1 |
| 126 | 133 | 1 |
| 127 | 129 | 1 |
| 127 | 130 | 1 |
| 128 | 129 | 1 |
| 128 | 130 | 1 |
| 129 | 131 | 1 |
| 129 | 132 | 1 |
| 130 | 131 | 1 |
| 130 | 132 | 1 |
| 131 | 134 | 1 |
| 132 | 134 | 1 |
| 133 | 134 | 1 |
| 135 | 136 | 1 |
| 136 | 137 | 1 |
| 136 | 138 | 1 |
| 139 | 140 | 1 |
| 141 | 142 | 1 |
| 142 | 143 | 1 |
| 143 | 144 | 1 |
| 145 | 146 | 1 |
| 146 | 147 | 1 |
| 146 | 148 | 1 |
| 146 | 153 | 1 |
| 147 | 149 | 1 |
| 147 | 150 | 1 |
| 148 | 149 | 1 |
| 148 | 150 | 1 |
| 149 | 151 | 1 |

|     |     |   |
|-----|-----|---|
| 149 | 152 | 1 |
| 150 | 151 | 1 |
| 150 | 152 | 1 |
| 151 | 154 | 1 |
| 152 | 154 | 1 |
| 153 | 154 | 1 |
| 155 | 156 | 1 |
| 156 | 157 | 1 |
| 156 | 158 | 1 |
| 159 | 160 | 1 |
| 161 | 162 | 1 |
| 162 | 163 | 1 |
| 163 | 164 | 1 |
| 165 | 166 | 1 |
| 166 | 167 | 1 |
| 166 | 168 | 1 |
| 166 | 173 | 1 |
| 167 | 169 | 1 |
| 167 | 170 | 1 |
| 168 | 169 | 1 |
| 168 | 170 | 1 |
| 169 | 171 | 1 |
| 169 | 172 | 1 |
| 170 | 171 | 1 |
| 170 | 172 | 1 |
| 171 | 174 | 1 |
| 172 | 174 | 1 |
| 173 | 174 | 1 |
| 175 | 176 | 1 |
| 176 | 177 | 1 |
| 176 | 178 | 1 |
| 179 | 180 | 1 |
| 181 | 182 | 1 |
| 182 | 183 | 1 |
| 183 | 184 | 1 |
| 1   | 4   | 1 |
| 1   | 16  | 1 |
| 1   | 19  | 1 |
| 1   | 22  | 1 |
| 1   | 30  | 1 |
| 2   | 18  | 1 |
| 2   | 28  | 1 |
| 2   | 29  | 1 |
| 2   | 5   | 1 |
| 2   | 12  | 1 |
| 17  | 3   | 1 |
| 27  | 3   | 1 |
| 3   | 6   | 1 |
| 3   | 13  | 1 |
| 3   | 11  | 1 |
| 4   | 7   | 1 |
| 4   | 10  | 1 |
| 4   | 14  | 1 |
| 4   | 15  | 1 |
| 5   | 16  | 1 |
| 5   | 11  | 1 |
| 5   | 8   | 1 |
| 6   | 12  | 1 |
| 6   | 14  | 1 |
| 6   | 15  | 1 |
| 6   | 9   | 1 |
| 6   | 90  | 1 |
| 7   | 13  | 1 |
| 7   | 11  | 1 |
| 7   | 89  | 1 |
| 7   | 91  | 1 |
| 8   | 10  | 1 |
| 8   | 87  | 1 |
| 8   | 92  | 1 |
| 9   | 89  | 1 |
| 9   | 91  | 1 |
| 10  | 13  | 1 |
| 12  | 16  | 1 |
| 12  | 13  | 1 |
| 17  | 28  | 1 |
| 17  | 29  | 1 |
| 17  | 20  | 1 |
| 17  | 21  | 1 |
| 17  | 23  | 1 |
| 27  | 18  | 1 |
| 18  | 26  | 1 |
| 18  | 24  | 1 |
| 19  | 23  | 1 |
| 19  | 26  | 1 |
| 20  | 23  | 1 |
| 20  | 25  | 1 |
| 21  | 24  | 1 |
| 22  | 25  | 1 |
| 23  | 26  | 1 |
| 27  | 31  | 1 |
| 27  | 34  | 1 |
| 28  | 30  | 1 |
| 29  | 32  | 1 |
| 29  | 35  | 1 |
| 29  | 36  | 1 |
| 30  | 33  | 1 |
| 30  | 101 | 1 |
| 30  | 103 | 1 |
| 30  | 37  | 1 |
| 31  | 35  | 1 |
| 31  | 36  | 1 |
| 32  | 34  | 1 |
| 32  | 37  | 1 |
| 33  | 35  | 1 |
| 33  | 38  | 1 |
| 33  | 39  | 1 |
| 34  | 38  | 1 |
| 34  | 39  | 1 |
| 35  | 37  | 1 |
| 36  | 101 | 1 |
| 36  | 103 | 1 |
| 36  | 40  | 1 |
| 37  | 41  | 1 |

|    |     |   |
|----|-----|---|
| 37 | 51  | 1 |
| 38 | 40  | 1 |
| 39 | 42  | 1 |
| 39 | 52  | 1 |
| 39 | 53  | 1 |
| 40 | 43  | 1 |
| 40 | 46  | 1 |
| 40 | 54  | 1 |
| 41 | 52  | 1 |
| 41 | 53  | 1 |
| 41 | 44  | 1 |
| 41 | 45  | 1 |
| 41 | 47  | 1 |
| 42 | 51  | 1 |
| 42 | 50  | 1 |
| 42 | 48  | 1 |
| 43 | 47  | 1 |
| 43 | 50  | 1 |
| 44 | 47  | 1 |
| 44 | 49  | 1 |
| 45 | 48  | 1 |
| 46 | 49  | 1 |
| 47 | 50  | 1 |
| 51 | 55  | 1 |
| 51 | 58  | 1 |
| 52 | 54  | 1 |
| 53 | 56  | 1 |
| 53 | 59  | 1 |
| 53 | 62  | 1 |
| 54 | 57  | 1 |
| 54 | 60  | 1 |
| 54 | 61  | 1 |
| 54 | 63  | 1 |
| 55 | 59  | 1 |
| 55 | 62  | 1 |
| 56 | 58  | 1 |
| 56 | 63  | 1 |
| 57 | 59  | 1 |
| 57 | 64  | 1 |
| 57 | 65  | 1 |
| 58 | 64  | 1 |
| 58 | 65  | 1 |
| 59 | 63  | 1 |
| 60 | 62  | 1 |
| 61 | 62  | 1 |
| 62 | 66  | 1 |
| 63 | 67  | 1 |
| 63 | 77  | 1 |
| 64 | 66  | 1 |
| 65 | 68  | 1 |
| 65 | 78  | 1 |
| 65 | 79  | 1 |
| 66 | 69  | 1 |
| 66 | 72  | 1 |
| 66 | 80  | 1 |
| 67 | 78  | 1 |
| 67 | 79  | 1 |
| 67 | 70  | 1 |
| 67 | 71  | 1 |
| 67 | 73  | 1 |
| 68 | 77  | 1 |
| 68 | 76  | 1 |
| 68 | 74  | 1 |
| 69 | 73  | 1 |
| 69 | 76  | 1 |
| 70 | 73  | 1 |
| 70 | 75  | 1 |
| 71 | 74  | 1 |
| 72 | 75  | 1 |
| 73 | 76  | 1 |
| 77 | 81  | 1 |
| 77 | 84  | 1 |
| 78 | 80  | 1 |
| 79 | 82  | 1 |
| 79 | 85  | 1 |
| 79 | 86  | 1 |
| 80 | 83  | 1 |
| 80 | 102 | 1 |
| 80 | 104 | 1 |
| 80 | 87  | 1 |
| 81 | 85  | 1 |
| 81 | 86  | 1 |
| 82 | 84  | 1 |
| 82 | 87  | 1 |
| 83 | 85  | 1 |
| 83 | 88  | 1 |
| 83 | 89  | 1 |
| 84 | 88  | 1 |
| 84 | 89  | 1 |
| 85 | 87  | 1 |
| 86 | 102 | 1 |
| 86 | 104 | 1 |
| 86 | 90  | 1 |
| 87 | 91  | 1 |
| 88 | 90  | 1 |
| 89 | 92  | 1 |
| 90 | 93  | 1 |
| 90 | 96  | 1 |
| 91 | 94  | 1 |
| 91 | 95  | 1 |
| 91 | 97  | 1 |
| 92 | 100 | 1 |
| 92 | 98  | 1 |
| 93 | 97  | 1 |
| 93 | 100 | 1 |
| 94 | 97  | 1 |
| 94 | 99  | 1 |
| 95 | 98  | 1 |
| 96 | 99  | 1 |
| 97 | 100 | 1 |

```
[ angles ]
; ai aj ak funct theta cth
```

|    |    |     |   |            |            |
|----|----|-----|---|------------|------------|
| 1  | 2  | 106 | 1 | 1.1768e+02 | 3.8325e+02 |
| 1  | 17 | 117 | 1 | 1.0980e+02 | 3.8777e+02 |
| 1  | 17 | 118 | 1 | 1.0980e+02 | 3.8777e+02 |
| 2  | 1  | 105 | 1 | 1.0888e+02 | 4.1706e+02 |
| 3  | 2  | 106 | 1 | 1.1755e+02 | 4.0443e+02 |
| 3  | 4  | 107 | 1 | 1.0877e+02 | 3.9271e+02 |
| 4  | 5  | 108 | 1 | 1.0980e+02 | 3.8777e+02 |
| 4  | 12 | 115 | 1 | 1.0980e+02 | 3.8777e+02 |
| 4  | 12 | 116 | 1 | 1.0980e+02 | 3.8777e+02 |
| 5  | 4  | 107 | 1 | 1.0980e+02 | 3.8777e+02 |
| 5  | 6  | 109 | 1 | 1.0956e+02 | 3.8819e+02 |
| 6  | 5  | 108 | 1 | 1.0980e+02 | 3.8777e+02 |
| 6  | 7  | 110 | 1 | 1.1768e+02 | 3.8325e+02 |
| 6  | 10 | 111 | 1 | 1.0980e+02 | 3.8777e+02 |
| 6  | 10 | 112 | 1 | 1.0980e+02 | 3.8777e+02 |
| 7  | 6  | 109 | 1 | 1.0888e+02 | 4.1706e+02 |
| 8  | 7  | 110 | 1 | 1.1755e+02 | 4.0443e+02 |
| 8  | 90 | 176 | 1 | 1.0822e+02 | 3.9363e+02 |
| 10 | 6  | 109 | 1 | 1.0956e+02 | 3.8819e+02 |
| 10 | 11 | 113 | 1 | 1.0980e+02 | 3.8777e+02 |
| 10 | 11 | 114 | 1 | 1.0980e+02 | 3.8777e+02 |
| 11 | 10 | 111 | 1 | 1.0980e+02 | 3.8777e+02 |
| 11 | 10 | 112 | 1 | 1.0980e+02 | 3.8777e+02 |
| 11 | 12 | 115 | 1 | 1.0980e+02 | 3.8777e+02 |
| 11 | 12 | 116 | 1 | 1.0980e+02 | 3.8777e+02 |
| 12 | 4  | 107 | 1 | 1.0980e+02 | 3.8777e+02 |
| 12 | 11 | 113 | 1 | 1.0980e+02 | 3.8777e+02 |
| 12 | 11 | 114 | 1 | 1.0980e+02 | 3.8777e+02 |
| 13 | 5  | 108 | 1 | 1.0877e+02 | 3.9271e+02 |
| 17 | 1  | 105 | 1 | 1.0956e+02 | 3.8819e+02 |
| 18 | 17 | 117 | 1 | 1.1049e+02 | 3.9480e+02 |
| 18 | 17 | 118 | 1 | 1.1049e+02 | 3.9480e+02 |
| 18 | 19 | 119 | 1 | 1.2848e+02 | 3.9556e+02 |
| 19 | 20 | 120 | 1 | 1.2550e+02 | 3.9120e+02 |
| 20 | 19 | 119 | 1 | 1.2053e+02 | 4.1664e+02 |
| 21 | 20 | 120 | 1 | 1.2554e+02 | 3.9020e+02 |
| 21 | 26 | 124 | 1 | 1.1988e+02 | 4.0317e+02 |
| 22 | 23 | 121 | 1 | 1.1988e+02 | 4.0317e+02 |
| 23 | 24 | 122 | 1 | 1.1988e+02 | 4.0317e+02 |
| 24 | 23 | 121 | 1 | 1.1988e+02 | 4.0317e+02 |
| 24 | 25 | 123 | 1 | 1.1988e+02 | 4.0317e+02 |
| 25 | 24 | 122 | 1 | 1.1988e+02 | 4.0317e+02 |
| 25 | 26 | 124 | 1 | 1.1988e+02 | 4.0317e+02 |
| 26 | 25 | 123 | 1 | 1.1988e+02 | 4.0317e+02 |
| 27 | 1  | 105 | 1 | 1.0822e+02 | 3.9363e+02 |
| 27 | 29 | 125 | 1 | 1.1755e+02 | 4.0443e+02 |
| 29 | 30 | 126 | 1 | 1.0888e+02 | 4.1706e+02 |
| 30 | 29 | 125 | 1 | 1.1768e+02 | 3.8325e+02 |
| 30 | 31 | 127 | 1 | 1.0980e+02 | 3.8777e+02 |
| 30 | 31 | 128 | 1 | 1.0980e+02 | 3.8777e+02 |
| 30 | 34 | 133 | 1 | 1.0980e+02 | 3.8777e+02 |
| 31 | 30 | 126 | 1 | 1.0956e+02 | 3.8819e+02 |
| 31 | 32 | 129 | 1 | 1.0980e+02 | 3.8777e+02 |
| 31 | 32 | 130 | 1 | 1.0980e+02 | 3.8777e+02 |
| 32 | 31 | 127 | 1 | 1.0980e+02 | 3.8777e+02 |
| 32 | 31 | 128 | 1 | 1.0980e+02 | 3.8777e+02 |
| 32 | 33 | 131 | 1 | 1.0980e+02 | 3.8777e+02 |
| 32 | 33 | 132 | 1 | 1.0980e+02 | 3.8777e+02 |
| 33 | 32 | 129 | 1 | 1.0980e+02 | 3.8777e+02 |
| 33 | 32 | 130 | 1 | 1.0980e+02 | 3.8777e+02 |
| 33 | 36 | 134 | 1 | 1.0980e+02 | 3.8777e+02 |
| 34 | 30 | 126 | 1 | 1.0956e+02 | 3.8819e+02 |
| 34 | 36 | 134 | 1 | 1.0980e+02 | 3.8777e+02 |
| 35 | 34 | 133 | 1 | 1.0877e+02 | 3.9271e+02 |
| 36 | 33 | 131 | 1 | 1.0980e+02 | 3.8777e+02 |
| 36 | 33 | 132 | 1 | 1.0980e+02 | 3.8777e+02 |
| 36 | 34 | 133 | 1 | 1.0980e+02 | 3.8777e+02 |
| 37 | 36 | 134 | 1 | 1.0877e+02 | 3.9271e+02 |
| 37 | 39 | 135 | 1 | 1.1755e+02 | 4.0443e+02 |
| 39 | 40 | 136 | 1 | 1.0888e+02 | 4.1706e+02 |
| 40 | 39 | 135 | 1 | 1.1768e+02 | 3.8325e+02 |
| 40 | 41 | 137 | 1 | 1.0980e+02 | 3.8777e+02 |
| 40 | 41 | 138 | 1 | 1.0980e+02 | 3.8777e+02 |
| 41 | 40 | 136 | 1 | 1.0956e+02 | 3.8819e+02 |
| 42 | 41 | 137 | 1 | 1.1049e+02 | 3.9480e+02 |
| 42 | 41 | 138 | 1 | 1.1049e+02 | 3.9480e+02 |
| 42 | 43 | 139 | 1 | 1.2848e+02 | 3.9556e+02 |
| 43 | 44 | 140 | 1 | 1.2550e+02 | 3.9120e+02 |
| 44 | 43 | 139 | 1 | 1.2053e+02 | 4.1664e+02 |
| 45 | 44 | 140 | 1 | 1.2554e+02 | 3.9020e+02 |
| 45 | 50 | 144 | 1 | 1.1988e+02 | 4.0317e+02 |
| 46 | 47 | 141 | 1 | 1.1988e+02 | 4.0317e+02 |
| 47 | 48 | 142 | 1 | 1.1988e+02 | 4.0317e+02 |
| 48 | 47 | 141 | 1 | 1.1988e+02 | 4.0317e+02 |
| 48 | 49 | 143 | 1 | 1.1988e+02 | 4.0317e+02 |
| 49 | 48 | 142 | 1 | 1.1988e+02 | 4.0317e+02 |
| 49 | 50 | 144 | 1 | 1.1988e+02 | 4.0317e+02 |
| 50 | 49 | 143 | 1 | 1.1988e+02 | 4.0317e+02 |
| 51 | 40 | 136 | 1 | 1.0822e+02 | 3.9363e+02 |
| 51 | 53 | 145 | 1 | 1.1755e+02 | 4.0443e+02 |
| 53 | 54 | 146 | 1 | 1.0888e+02 | 4.1706e+02 |
| 54 | 53 | 145 | 1 | 1.1768e+02 | 3.8325e+02 |
| 54 | 55 | 147 | 1 | 1.0980e+02 | 3.8777e+02 |
| 54 | 55 | 148 | 1 | 1.0980e+02 | 3.8777e+02 |
| 54 | 58 | 153 | 1 | 1.0980e+02 | 3.8777e+02 |
| 55 | 54 | 146 | 1 | 1.0956e+02 | 3.8819e+02 |
| 55 | 56 | 149 | 1 | 1.0980e+02 | 3.8777e+02 |
| 55 | 56 | 150 | 1 | 1.0980e+02 | 3.8777e+02 |
| 56 | 55 | 147 | 1 | 1.0980e+02 | 3.8777e+02 |
| 56 | 55 | 148 | 1 | 1.0980e+02 | 3.8777e+02 |
| 56 | 57 | 151 | 1 | 1.0980e+02 | 3.8777e+02 |
| 56 | 57 | 152 | 1 | 1.0980e+02 | 3.8777e+02 |
| 57 | 56 | 149 | 1 | 1.0980e+02 | 3.8777e+02 |
| 57 | 56 | 150 | 1 | 1.0980e+02 | 3.8777e+02 |
| 57 | 62 | 154 | 1 | 1.0980e+02 | 3.8777e+02 |
| 58 | 54 | 146 | 1 | 1.0956e+02 | 3.8819e+02 |
| 58 | 62 | 154 | 1 | 1.0980e+02 | 3.8777e+02 |
| 59 | 58 | 153 | 1 | 1.0877e+02 | 3.9271e+02 |
| 62 | 57 | 151 | 1 | 1.0980e+02 | 3.8777e+02 |
| 62 | 57 | 152 | 1 | 1.0980e+02 | 3.8777e+02 |
| 62 | 58 | 153 | 1 | 1.0980e+02 | 3.8777e+02 |
| 63 | 62 | 154 | 1 | 1.0877e+02 | 3.9271e+02 |
| 63 | 65 | 155 | 1 | 1.1755e+02 | 4.0443e+02 |

|     |     |     |   |            |            |
|-----|-----|-----|---|------------|------------|
| 65  | 66  | 156 | 1 | 1.0888e+02 | 4.1706e+02 |
| 66  | 65  | 155 | 1 | 1.1768e+02 | 3.8325e+02 |
| 66  | 67  | 157 | 1 | 1.0980e+02 | 3.8777e+02 |
| 66  | 67  | 158 | 1 | 1.0980e+02 | 3.8777e+02 |
| 67  | 66  | 156 | 1 | 1.0956e+02 | 3.8819e+02 |
| 68  | 67  | 157 | 1 | 1.1049e+02 | 3.9480e+02 |
| 68  | 67  | 158 | 1 | 1.1049e+02 | 3.9480e+02 |
| 68  | 69  | 159 | 1 | 1.2848e+02 | 3.9556e+02 |
| 69  | 70  | 160 | 1 | 1.2550e+02 | 3.9120e+02 |
| 70  | 69  | 159 | 1 | 1.2053e+02 | 4.1664e+02 |
| 71  | 70  | 160 | 1 | 1.2554e+02 | 3.9020e+02 |
| 71  | 76  | 164 | 1 | 1.1988e+02 | 4.0317e+02 |
| 72  | 73  | 161 | 1 | 1.1988e+02 | 4.0317e+02 |
| 73  | 74  | 162 | 1 | 1.1988e+02 | 4.0317e+02 |
| 74  | 73  | 161 | 1 | 1.1988e+02 | 4.0317e+02 |
| 74  | 75  | 163 | 1 | 1.1988e+02 | 4.0317e+02 |
| 75  | 74  | 162 | 1 | 1.1988e+02 | 4.0317e+02 |
| 75  | 76  | 164 | 1 | 1.1988e+02 | 4.0317e+02 |
| 76  | 75  | 163 | 1 | 1.1988e+02 | 4.0317e+02 |
| 77  | 66  | 156 | 1 | 1.0822e+02 | 3.9363e+02 |
| 77  | 79  | 165 | 1 | 1.1755e+02 | 4.0443e+02 |
| 79  | 80  | 166 | 1 | 1.0888e+02 | 4.1706e+02 |
| 80  | 79  | 165 | 1 | 1.1768e+02 | 3.8325e+02 |
| 80  | 81  | 167 | 1 | 1.0980e+02 | 3.8777e+02 |
| 80  | 81  | 168 | 1 | 1.0980e+02 | 3.8777e+02 |
| 80  | 84  | 173 | 1 | 1.0980e+02 | 3.8777e+02 |
| 81  | 80  | 166 | 1 | 1.0956e+02 | 3.8819e+02 |
| 81  | 82  | 169 | 1 | 1.0980e+02 | 3.8777e+02 |
| 81  | 82  | 170 | 1 | 1.0980e+02 | 3.8777e+02 |
| 82  | 81  | 167 | 1 | 1.0980e+02 | 3.8777e+02 |
| 82  | 81  | 168 | 1 | 1.0980e+02 | 3.8777e+02 |
| 82  | 83  | 171 | 1 | 1.0980e+02 | 3.8777e+02 |
| 82  | 83  | 172 | 1 | 1.0980e+02 | 3.8777e+02 |
| 83  | 82  | 169 | 1 | 1.0980e+02 | 3.8777e+02 |
| 83  | 82  | 170 | 1 | 1.0980e+02 | 3.8777e+02 |
| 83  | 86  | 174 | 1 | 1.0980e+02 | 3.8777e+02 |
| 84  | 80  | 166 | 1 | 1.0956e+02 | 3.8819e+02 |
| 84  | 86  | 174 | 1 | 1.0980e+02 | 3.8777e+02 |
| 85  | 84  | 173 | 1 | 1.0877e+02 | 3.9271e+02 |
| 86  | 83  | 171 | 1 | 1.0980e+02 | 3.8777e+02 |
| 86  | 83  | 172 | 1 | 1.0980e+02 | 3.8777e+02 |
| 86  | 84  | 173 | 1 | 1.0980e+02 | 3.8777e+02 |
| 87  | 86  | 174 | 1 | 1.0877e+02 | 3.9271e+02 |
| 87  | 89  | 175 | 1 | 1.1755e+02 | 4.0443e+02 |
| 89  | 90  | 176 | 1 | 1.0888e+02 | 4.1706e+02 |
| 90  | 89  | 175 | 1 | 1.1768e+02 | 3.8325e+02 |
| 90  | 91  | 177 | 1 | 1.0980e+02 | 3.8777e+02 |
| 90  | 91  | 178 | 1 | 1.0980e+02 | 3.8777e+02 |
| 91  | 90  | 176 | 1 | 1.0956e+02 | 3.8819e+02 |
| 92  | 91  | 177 | 1 | 1.1049e+02 | 3.9480e+02 |
| 92  | 91  | 178 | 1 | 1.1049e+02 | 3.9480e+02 |
| 92  | 93  | 179 | 1 | 1.2848e+02 | 3.9556e+02 |
| 93  | 94  | 180 | 1 | 1.2550e+02 | 3.9120e+02 |
| 94  | 93  | 179 | 1 | 1.2053e+02 | 4.1664e+02 |
| 95  | 94  | 180 | 1 | 1.2554e+02 | 3.9020e+02 |
| 95  | 100 | 184 | 1 | 1.1988e+02 | 4.0317e+02 |
| 96  | 97  | 181 | 1 | 1.1988e+02 | 4.0317e+02 |
| 97  | 98  | 182 | 1 | 1.1988e+02 | 4.0317e+02 |
| 98  | 97  | 181 | 1 | 1.1988e+02 | 4.0317e+02 |
| 98  | 99  | 183 | 1 | 1.1988e+02 | 4.0317e+02 |
| 99  | 98  | 182 | 1 | 1.1988e+02 | 4.0317e+02 |
| 99  | 100 | 184 | 1 | 1.1988e+02 | 4.0317e+02 |
| 100 | 99  | 183 | 1 | 1.1988e+02 | 4.0317e+02 |
| 111 | 10  | 112 | 1 | 1.0758e+02 | 3.2970e+02 |
| 113 | 11  | 114 | 1 | 1.0758e+02 | 3.2970e+02 |
| 115 | 12  | 116 | 1 | 1.0758e+02 | 3.2970e+02 |
| 117 | 17  | 118 | 1 | 1.0758e+02 | 3.2970e+02 |
| 127 | 31  | 128 | 1 | 1.0758e+02 | 3.2970e+02 |
| 129 | 32  | 130 | 1 | 1.0758e+02 | 3.2970e+02 |
| 131 | 33  | 132 | 1 | 1.0758e+02 | 3.2970e+02 |
| 137 | 41  | 138 | 1 | 1.0758e+02 | 3.2970e+02 |
| 147 | 55  | 148 | 1 | 1.0758e+02 | 3.2970e+02 |
| 149 | 56  | 150 | 1 | 1.0758e+02 | 3.2970e+02 |
| 151 | 57  | 152 | 1 | 1.0758e+02 | 3.2970e+02 |
| 157 | 67  | 158 | 1 | 1.0758e+02 | 3.2970e+02 |
| 167 | 81  | 168 | 1 | 1.0758e+02 | 3.2970e+02 |
| 169 | 82  | 170 | 1 | 1.0758e+02 | 3.2970e+02 |
| 171 | 83  | 172 | 1 | 1.0758e+02 | 3.2970e+02 |
| 177 | 91  | 178 | 1 | 1.0758e+02 | 3.2970e+02 |
| 1   | 2   | 3   | 1 | 1.2069e+02 | 5.3045e+02 |
| 1   | 17  | 18  | 1 | 1.1193e+02 | 5.3112e+02 |
| 1   | 27  | 28  | 1 | 1.2320e+02 | 5.6400e+02 |
| 1   | 27  | 29  | 1 | 1.1518e+02 | 5.5890e+02 |
| 2   | 1   | 17  | 1 | 1.1161e+02 | 5.5153e+02 |
| 2   | 1   | 27  | 1 | 1.0906e+02 | 5.6066e+02 |
| 2   | 3   | 4   | 1 | 1.1518e+02 | 5.5890e+02 |
| 2   | 3   | 16  | 1 | 1.2305e+02 | 6.2107e+02 |
| 3   | 4   | 5   | 1 | 1.1104e+02 | 5.2944e+02 |
| 3   | 4   | 12  | 1 | 1.1104e+02 | 5.2944e+02 |
| 4   | 3   | 16  | 1 | 1.2320e+02 | 5.6400e+02 |
| 4   | 5   | 6   | 1 | 1.1151e+02 | 5.2601e+02 |
| 4   | 5   | 13  | 1 | 1.1104e+02 | 5.2944e+02 |
| 4   | 12  | 11  | 1 | 1.1151e+02 | 5.2601e+02 |
| 5   | 4   | 12  | 1 | 1.1151e+02 | 5.2601e+02 |
| 5   | 6   | 7   | 1 | 1.1161e+02 | 5.5153e+02 |
| 5   | 6   | 10  | 1 | 1.1151e+02 | 5.2601e+02 |
| 5   | 13  | 14  | 1 | 1.2320e+02 | 5.6400e+02 |
| 5   | 13  | 15  | 1 | 1.2320e+02 | 5.6400e+02 |
| 6   | 5   | 13  | 1 | 1.1104e+02 | 5.2944e+02 |
| 6   | 7   | 8   | 1 | 1.2069e+02 | 5.3045e+02 |
| 6   | 10  | 11  | 1 | 1.1151e+02 | 5.2601e+02 |
| 7   | 6   | 10  | 1 | 1.1161e+02 | 5.5153e+02 |
| 7   | 8   | 9   | 1 | 1.2305e+02 | 6.2107e+02 |
| 7   | 8   | 90  | 1 | 1.1518e+02 | 5.5890e+02 |
| 8   | 90  | 89  | 1 | 1.0906e+02 | 5.6066e+02 |
| 8   | 90  | 91  | 1 | 1.1104e+02 | 5.2944e+02 |
| 9   | 8   | 90  | 1 | 1.2320e+02 | 5.6400e+02 |
| 10  | 11  | 12  | 1 | 1.1151e+02 | 5.2601e+02 |
| 14  | 13  | 15  | 1 | 1.3025e+02 | 6.5220e+02 |
| 17  | 1   | 27  | 1 | 1.1104e+02 | 5.2944e+02 |
| 17  | 18  | 19  | 1 | 1.1945e+02 | 5.4149e+02 |
| 17  | 18  | 22  | 1 | 1.2652e+02 | 5.1329e+02 |
| 18  | 19  | 20  | 1 | 1.0699e+02 | 6.1446e+02 |

|    |    |     |   |            |            |
|----|----|-----|---|------------|------------|
| 18 | 22 | 21  | 1 | 1.2079e+02 | 5.4409e+02 |
| 18 | 22 | 23  | 1 | 1.2079e+02 | 5.4409e+02 |
| 19 | 18 | 22  | 1 | 1.1351e+02 | 5.6584e+02 |
| 19 | 20 | 21  | 1 | 1.1315e+02 | 5.6400e+02 |
| 20 | 21 | 22  | 1 | 1.1834e+02 | 5.7806e+02 |
| 20 | 21 | 26  | 1 | 1.1834e+02 | 5.7806e+02 |
| 21 | 22 | 23  | 1 | 1.2002e+02 | 5.5748e+02 |
| 21 | 26 | 25  | 1 | 1.2002e+02 | 5.5748e+02 |
| 22 | 21 | 26  | 1 | 1.2002e+02 | 5.5748e+02 |
| 22 | 23 | 24  | 1 | 1.2002e+02 | 5.5748e+02 |
| 23 | 24 | 25  | 1 | 1.2002e+02 | 5.5748e+02 |
| 24 | 25 | 26  | 1 | 1.2002e+02 | 5.5748e+02 |
| 27 | 29 | 30  | 1 | 1.2069e+02 | 5.3045e+02 |
| 28 | 27 | 29  | 1 | 1.2305e+02 | 6.2107e+02 |
| 29 | 30 | 31  | 1 | 1.1161e+02 | 5.5153e+02 |
| 29 | 30 | 34  | 1 | 1.1161e+02 | 5.5153e+02 |
| 30 | 31 | 32  | 1 | 1.1151e+02 | 5.2601e+02 |
| 30 | 34 | 35  | 1 | 1.1104e+02 | 5.2944e+02 |
| 30 | 34 | 36  | 1 | 1.1151e+02 | 5.2601e+02 |
| 31 | 30 | 34  | 1 | 1.1151e+02 | 5.2601e+02 |
| 31 | 32 | 33  | 1 | 1.1151e+02 | 5.2601e+02 |
| 32 | 33 | 36  | 1 | 1.1151e+02 | 5.2601e+02 |
| 33 | 36 | 34  | 1 | 1.1151e+02 | 5.2601e+02 |
| 33 | 36 | 37  | 1 | 1.1104e+02 | 5.2944e+02 |
| 34 | 35 | 101 | 1 | 1.2320e+02 | 5.6400e+02 |
| 34 | 35 | 103 | 1 | 1.2320e+02 | 5.6400e+02 |
| 34 | 36 | 37  | 1 | 1.1104e+02 | 5.2944e+02 |
| 35 | 34 | 36  | 1 | 1.1104e+02 | 5.2944e+02 |
| 36 | 37 | 38  | 1 | 1.2320e+02 | 5.6400e+02 |
| 36 | 37 | 39  | 1 | 1.1518e+02 | 5.5890e+02 |
| 37 | 39 | 40  | 1 | 1.2069e+02 | 5.3045e+02 |
| 38 | 37 | 39  | 1 | 1.2305e+02 | 6.2107e+02 |
| 39 | 40 | 41  | 1 | 1.1161e+02 | 5.5153e+02 |
| 39 | 40 | 51  | 1 | 1.0906e+02 | 5.6066e+02 |
| 40 | 41 | 42  | 1 | 1.1193e+02 | 5.3112e+02 |
| 40 | 51 | 52  | 1 | 1.2320e+02 | 5.6400e+02 |
| 40 | 51 | 53  | 1 | 1.1518e+02 | 5.5890e+02 |
| 41 | 40 | 51  | 1 | 1.1104e+02 | 5.2944e+02 |
| 41 | 42 | 43  | 1 | 1.1945e+02 | 5.4149e+02 |
| 41 | 42 | 46  | 1 | 1.2652e+02 | 5.1329e+02 |
| 42 | 43 | 44  | 1 | 1.0699e+02 | 6.1446e+02 |
| 42 | 46 | 45  | 1 | 1.2079e+02 | 5.4409e+02 |
| 42 | 46 | 47  | 1 | 1.2079e+02 | 5.4409e+02 |
| 43 | 42 | 46  | 1 | 1.1351e+02 | 5.6584e+02 |
| 43 | 44 | 45  | 1 | 1.1315e+02 | 5.6400e+02 |
| 44 | 45 | 46  | 1 | 1.1834e+02 | 5.7806e+02 |
| 44 | 45 | 50  | 1 | 1.1834e+02 | 5.7806e+02 |
| 45 | 46 | 47  | 1 | 1.2002e+02 | 5.5748e+02 |
| 45 | 50 | 49  | 1 | 1.2002e+02 | 5.5748e+02 |
| 46 | 45 | 50  | 1 | 1.2002e+02 | 5.5748e+02 |
| 46 | 47 | 48  | 1 | 1.2002e+02 | 5.5748e+02 |
| 47 | 48 | 49  | 1 | 1.2002e+02 | 5.5748e+02 |
| 48 | 49 | 50  | 1 | 1.2002e+02 | 5.5748e+02 |
| 51 | 53 | 54  | 1 | 1.2069e+02 | 5.3045e+02 |
| 52 | 51 | 53  | 1 | 1.2305e+02 | 6.2107e+02 |
| 53 | 54 | 55  | 1 | 1.1161e+02 | 5.5153e+02 |
| 53 | 54 | 58  | 1 | 1.1161e+02 | 5.5153e+02 |
| 54 | 55 | 56  | 1 | 1.1151e+02 | 5.2601e+02 |
| 54 | 58 | 59  | 1 | 1.1104e+02 | 5.2944e+02 |
| 54 | 58 | 62  | 1 | 1.1151e+02 | 5.2601e+02 |
| 55 | 54 | 58  | 1 | 1.1151e+02 | 5.2601e+02 |
| 55 | 56 | 57  | 1 | 1.1151e+02 | 5.2601e+02 |
| 56 | 57 | 62  | 1 | 1.1151e+02 | 5.2601e+02 |
| 57 | 62 | 58  | 1 | 1.1151e+02 | 5.2601e+02 |
| 57 | 62 | 63  | 1 | 1.1104e+02 | 5.2944e+02 |
| 58 | 59 | 60  | 1 | 1.2320e+02 | 5.6400e+02 |
| 58 | 59 | 61  | 1 | 1.2320e+02 | 5.6400e+02 |
| 58 | 62 | 63  | 1 | 1.1104e+02 | 5.2944e+02 |
| 59 | 58 | 62  | 1 | 1.1104e+02 | 5.2944e+02 |
| 60 | 59 | 61  | 1 | 1.3025e+02 | 6.5220e+02 |
| 62 | 63 | 64  | 1 | 1.2320e+02 | 5.6400e+02 |
| 62 | 63 | 65  | 1 | 1.1518e+02 | 5.5890e+02 |
| 63 | 65 | 66  | 1 | 1.2069e+02 | 5.3045e+02 |
| 64 | 63 | 65  | 1 | 1.2305e+02 | 6.2107e+02 |
| 65 | 66 | 67  | 1 | 1.1161e+02 | 5.5153e+02 |
| 65 | 66 | 77  | 1 | 1.0906e+02 | 5.6066e+02 |
| 66 | 67 | 68  | 1 | 1.1193e+02 | 5.3112e+02 |
| 66 | 77 | 78  | 1 | 1.2320e+02 | 5.6400e+02 |
| 66 | 77 | 79  | 1 | 1.1518e+02 | 5.5890e+02 |
| 67 | 66 | 77  | 1 | 1.1104e+02 | 5.2944e+02 |
| 67 | 68 | 69  | 1 | 1.1945e+02 | 5.4149e+02 |
| 67 | 68 | 72  | 1 | 1.2652e+02 | 5.1329e+02 |
| 68 | 69 | 70  | 1 | 1.0699e+02 | 6.1446e+02 |
| 68 | 72 | 71  | 1 | 1.2079e+02 | 5.4409e+02 |
| 68 | 72 | 73  | 1 | 1.2079e+02 | 5.4409e+02 |
| 69 | 68 | 72  | 1 | 1.1351e+02 | 5.6584e+02 |
| 69 | 70 | 71  | 1 | 1.1315e+02 | 5.6400e+02 |
| 70 | 71 | 72  | 1 | 1.1834e+02 | 5.7806e+02 |
| 70 | 71 | 76  | 1 | 1.1834e+02 | 5.7806e+02 |
| 71 | 72 | 73  | 1 | 1.2002e+02 | 5.5748e+02 |
| 71 | 76 | 75  | 1 | 1.2002e+02 | 5.5748e+02 |
| 72 | 71 | 76  | 1 | 1.2002e+02 | 5.5748e+02 |
| 72 | 73 | 74  | 1 | 1.2002e+02 | 5.5748e+02 |
| 73 | 74 | 75  | 1 | 1.2002e+02 | 5.5748e+02 |
| 74 | 75 | 76  | 1 | 1.2002e+02 | 5.5748e+02 |
| 77 | 79 | 80  | 1 | 1.2069e+02 | 5.3045e+02 |
| 78 | 77 | 79  | 1 | 1.2305e+02 | 6.2107e+02 |
| 79 | 80 | 81  | 1 | 1.1161e+02 | 5.5153e+02 |
| 79 | 80 | 84  | 1 | 1.1161e+02 | 5.5153e+02 |
| 80 | 81 | 82  | 1 | 1.1151e+02 | 5.2601e+02 |
| 80 | 84 | 85  | 1 | 1.1104e+02 | 5.2944e+02 |
| 80 | 84 | 86  | 1 | 1.1151e+02 | 5.2601e+02 |
| 81 | 80 | 84  | 1 | 1.1151e+02 | 5.2601e+02 |
| 81 | 82 | 83  | 1 | 1.1151e+02 | 5.2601e+02 |
| 82 | 83 | 86  | 1 | 1.1151e+02 | 5.2601e+02 |
| 83 | 86 | 84  | 1 | 1.1151e+02 | 5.2601e+02 |
| 83 | 86 | 87  | 1 | 1.1104e+02 | 5.2944e+02 |
| 84 | 85 | 102 | 1 | 1.2320e+02 | 5.6400e+02 |
| 84 | 85 | 104 | 1 | 1.2320e+02 | 5.6400e+02 |
| 84 | 86 | 87  | 1 | 1.1104e+02 | 5.2944e+02 |
| 85 | 84 | 86  | 1 | 1.1104e+02 | 5.2944e+02 |
| 86 | 87 | 88  | 1 | 1.2320e+02 | 5.6400e+02 |
| 86 | 87 | 89  | 1 | 1.1518e+02 | 5.5890e+02 |



```

87 89 90 1 1.2069e+02 5.3045e+02
88 87 89 1 1.2305e+02 6.2107e+02
89 90 91 1 1.1161e+02 5.5153e+02
90 91 92 1 1.1193e+02 5.3112e+02
91 92 93 1 1.1945e+02 5.4149e+02
91 92 96 1 1.2652e+02 5.1329e+02
92 93 94 1 1.0699e+02 6.1446e+02
92 96 95 1 1.2079e+02 5.4409e+02
92 96 97 1 1.2079e+02 5.4409e+02
93 92 96 1 1.1351e+02 5.6584e+02
93 94 95 1 1.1315e+02 5.6400e+02
94 95 96 1 1.1834e+02 5.7806e+02
94 95 100 1 1.1834e+02 5.7806e+02
95 96 97 1 1.2002e+02 5.5748e+02
95 100 99 1 1.2002e+02 5.5748e+02
96 95 100 1 1.2002e+02 5.5748e+02
96 97 98 1 1.2002e+02 5.5748e+02
97 98 99 1 1.2002e+02 5.5748e+02
98 99 100 1 1.2002e+02 5.5748e+02
101 35 103 1 1.3025e+02 6.5220e+02
102 85 104 1 1.3025e+02 6.5220e+02

```

```
[ dihedrals ]
```

```

;i j k l func C0 ... C5
1 27 29 125 3 20.92000 0.00000 -20.92000 0.00000 0.00000 0.00000 ;
2 1 17 117 3 0.65270 1.95811 0.00000 -2.61082 0.00000 0.00000 ;
2 1 17 118 3 0.65270 1.95811 0.00000 -2.61082 0.00000 0.00000 ;
2 3 4 107 3 0.00000 0.00000 0.00000 0.00000 0.00000 0.00000 ;
105 1 2 3 3 0.00000 0.00000 0.00000 0.00000 0.00000 0.00000 ;
3 4 5 108 3 0.65270 1.95811 0.00000 -2.61082 0.00000 0.00000 ;
3 4 12 115 3 0.65270 1.95811 0.00000 -2.61082 0.00000 0.00000 ;
3 4 12 116 3 0.65270 1.95811 0.00000 -2.61082 0.00000 0.00000 ;
4 3 2 106 3 20.92000 0.00000 -20.92000 0.00000 0.00000 0.00000 ;
4 5 6 109 3 0.65270 1.95811 0.00000 -2.61082 0.00000 0.00000 ;
4 12 11 113 3 0.66944 2.00832 0.00000 -2.67776 0.00000 0.00000 ;
4 12 11 114 3 0.66944 2.00832 0.00000 -2.67776 0.00000 0.00000 ;
5 4 12 115 3 0.66944 2.00832 0.00000 -2.67776 0.00000 0.00000 ;
5 4 12 116 3 0.66944 2.00832 0.00000 -2.67776 0.00000 0.00000 ;
5 6 7 110 3 0.00000 0.00000 0.00000 0.00000 0.00000 0.00000 ;
5 6 10 111 3 0.66944 2.00832 0.00000 -2.67776 0.00000 0.00000 ;
5 6 10 112 3 0.66944 2.00832 0.00000 -2.67776 0.00000 0.00000 ;
6 5 4 107 3 0.66944 2.00832 0.00000 -2.67776 0.00000 0.00000 ;
6 10 11 113 3 0.66944 2.00832 0.00000 -2.67776 0.00000 0.00000 ;
6 10 11 114 3 0.66944 2.00832 0.00000 -2.67776 0.00000 0.00000 ;
7 6 5 108 3 0.65270 1.95811 0.00000 -2.61082 0.00000 0.00000 ;
7 6 10 111 3 0.65270 1.95811 0.00000 -2.61082 0.00000 0.00000 ;
7 6 10 112 3 0.65270 1.95811 0.00000 -2.61082 0.00000 0.00000 ;
7 8 90 176 3 0.00000 0.00000 0.00000 0.00000 0.00000 0.00000 ;
8 7 6 109 3 0.00000 0.00000 0.00000 0.00000 0.00000 0.00000 ;
8 90 89 175 3 0.00000 0.00000 0.00000 0.00000 0.00000 0.00000 ;
8 90 91 177 3 0.65270 1.95811 0.00000 -2.61082 0.00000 0.00000 ;
8 90 91 178 3 0.65270 1.95811 0.00000 -2.61082 0.00000 0.00000 ;
9 8 7 110 3 29.28800 -8.36800 -20.92000 0.00000 0.00000 0.00000 ;
9 8 90 176 3 3.68192 -4.35136 0.00000 1.33888 0.00000 0.00000 ;
10 6 5 108 3 0.66944 2.00832 0.00000 -2.67776 0.00000 0.00000 ;
10 6 7 110 3 0.00000 0.00000 0.00000 0.00000 0.00000 0.00000 ;
10 11 12 115 3 0.66944 2.00832 0.00000 -2.67776 0.00000 0.00000 ;
10 11 12 116 3 0.66944 2.00832 0.00000 -2.67776 0.00000 0.00000 ;
11 10 6 109 3 0.65270 1.95811 0.00000 -2.61082 0.00000 0.00000 ;
11 12 4 107 3 0.66944 2.00832 0.00000 -2.67776 0.00000 0.00000 ;
12 4 5 108 3 0.66944 2.00832 0.00000 -2.67776 0.00000 0.00000 ;
12 11 10 111 3 0.66944 2.00832 0.00000 -2.67776 0.00000 0.00000 ;
12 11 10 112 3 0.66944 2.00832 0.00000 -2.67776 0.00000 0.00000 ;
13 5 4 107 3 0.65270 1.95811 0.00000 -2.61082 0.00000 0.00000 ;
13 5 6 109 3 0.65270 1.95811 0.00000 -2.61082 0.00000 0.00000 ;
14 13 5 108 3 3.68192 -4.35136 0.00000 1.33888 0.00000 0.00000 ;
15 13 5 108 3 3.68192 -4.35136 0.00000 1.33888 0.00000 0.00000 ;
16 3 2 106 3 29.28800 -8.36800 -20.92000 0.00000 0.00000 0.00000 ;
16 3 4 107 3 3.68192 -4.35136 0.00000 1.33888 0.00000 0.00000 ;
17 1 2 106 3 0.00000 0.00000 0.00000 0.00000 0.00000 0.00000 ;
17 18 19 119 3 33.47200 0.00000 -33.47200 0.00000 0.00000 0.00000 ;
105 1 17 18 3 0.65270 1.95811 0.00000 -2.61082 0.00000 0.00000 ;
18 19 20 120 3 14.22560 0.00000 -14.22560 0.00000 0.00000 0.00000 ;
18 22 23 121 3 30.33400 0.00000 -30.33400 0.00000 0.00000 0.00000 ;
19 18 17 117 3 0.00000 0.00000 0.00000 0.00000 0.00000 0.00000 ;
19 18 17 118 3 0.00000 0.00000 0.00000 0.00000 0.00000 0.00000 ;
20 21 26 124 3 30.33400 0.00000 -30.33400 0.00000 0.00000 0.00000 ;
21 20 19 119 3 14.22560 0.00000 -14.22560 0.00000 0.00000 0.00000 ;
21 22 23 121 3 30.33400 0.00000 -30.33400 0.00000 0.00000 0.00000 ;
21 26 25 123 3 30.33400 0.00000 -30.33400 0.00000 0.00000 0.00000 ;
22 18 17 117 3 0.00000 0.00000 0.00000 0.00000 0.00000 0.00000 ;
22 18 17 118 3 0.00000 0.00000 0.00000 0.00000 0.00000 0.00000 ;
22 18 19 119 3 33.47200 0.00000 -33.47200 0.00000 0.00000 0.00000 ;
22 21 20 120 3 2.51040 0.00000 -2.51040 0.00000 0.00000 0.00000 ;
22 21 26 124 3 30.33400 0.00000 -30.33400 0.00000 0.00000 0.00000 ;
22 23 24 122 3 30.33400 0.00000 -30.33400 0.00000 0.00000 0.00000 ;
23 24 25 123 3 30.33400 0.00000 -30.33400 0.00000 0.00000 0.00000 ;
24 25 26 124 3 30.33400 0.00000 -30.33400 0.00000 0.00000 0.00000 ;
25 24 23 121 3 30.33400 0.00000 -30.33400 0.00000 0.00000 0.00000 ;
26 21 20 120 3 2.51040 0.00000 -2.51040 0.00000 0.00000 0.00000 ;
26 25 24 122 3 30.33400 0.00000 -30.33400 0.00000 0.00000 0.00000 ;
27 1 2 106 3 0.00000 0.00000 0.00000 0.00000 0.00000 0.00000 ;
27 1 17 117 3 0.65270 1.95811 0.00000 -2.61082 0.00000 0.00000 ;
27 1 17 118 3 0.65270 1.95811 0.00000 -2.61082 0.00000 0.00000 ;
27 29 30 126 3 0.00000 0.00000 0.00000 0.00000 0.00000 0.00000 ;
105 1 27 28 3 3.68192 -4.35136 0.00000 1.33888 0.00000 0.00000 ;
28 27 29 125 3 29.28800 -8.36800 -20.92000 0.00000 0.00000 0.00000 ;
105 1 27 29 3 0.00000 0.00000 0.00000 0.00000 0.00000 0.00000 ;
29 30 31 127 3 0.65270 1.95811 0.00000 -2.61082 0.00000 0.00000 ;
29 30 31 128 3 0.65270 1.95811 0.00000 -2.61082 0.00000 0.00000 ;
29 30 34 133 3 0.65270 1.95811 0.00000 -2.61082 0.00000 0.00000 ;
30 31 32 129 3 0.66944 2.00832 0.00000 -2.67776 0.00000 0.00000 ;
30 31 32 130 3 0.66944 2.00832 0.00000 -2.67776 0.00000 0.00000 ;
30 34 36 134 3 0.66944 2.00832 0.00000 -2.67776 0.00000 0.00000 ;
31 30 29 125 3 0.00000 0.00000 0.00000 0.00000 0.00000 0.00000 ;
31 30 34 133 3 0.66944 2.00832 0.00000 -2.67776 0.00000 0.00000 ;
31 32 33 131 3 0.66944 2.00832 0.00000 -2.67776 0.00000 0.00000 ;
31 32 33 132 3 0.66944 2.00832 0.00000 -2.67776 0.00000 0.00000 ;
32 31 30 126 3 0.65270 1.95811 0.00000 -2.61082 0.00000 0.00000 ;
32 33 36 134 3 0.66944 2.00832 0.00000 -2.67776 0.00000 0.00000 ;
33 32 31 127 3 0.66944 2.00832 0.00000 -2.67776 0.00000 0.00000 ;
33 32 31 128 3 0.66944 2.00832 0.00000 -2.67776 0.00000 0.00000 ;
33 36 34 133 3 0.66944 2.00832 0.00000 -2.67776 0.00000 0.00000 ;

```

|    |    |    |     |   |          |          |           |          |         |         |   |
|----|----|----|-----|---|----------|----------|-----------|----------|---------|---------|---|
| 34 | 30 | 29 | 125 | 3 | 0.00000  | 0.00000  | 0.00000   | 0.00000  | 0.00000 | 0.00000 | ; |
| 34 | 30 | 31 | 127 | 3 | 0.66944  | 2.00832  | 0.00000   | -2.67776 | 0.00000 | 0.00000 | ; |
| 34 | 30 | 31 | 128 | 3 | 0.66944  | 2.00832  | 0.00000   | -2.67776 | 0.00000 | 0.00000 | ; |
| 34 | 36 | 33 | 131 | 3 | 0.66944  | 2.00832  | 0.00000   | -2.67776 | 0.00000 | 0.00000 | ; |
| 34 | 36 | 33 | 132 | 3 | 0.66944  | 2.00832  | 0.00000   | -2.67776 | 0.00000 | 0.00000 | ; |
| 35 | 34 | 30 | 126 | 3 | 0.65270  | 1.95811  | 0.00000   | -2.61082 | 0.00000 | 0.00000 | ; |
| 35 | 34 | 36 | 134 | 3 | 0.65270  | 1.95811  | 0.00000   | -2.61082 | 0.00000 | 0.00000 | ; |
| 36 | 33 | 32 | 129 | 3 | 0.66944  | 2.00832  | 0.00000   | -2.67776 | 0.00000 | 0.00000 | ; |
| 36 | 33 | 32 | 130 | 3 | 0.66944  | 2.00832  | 0.00000   | -2.67776 | 0.00000 | 0.00000 | ; |
| 36 | 34 | 30 | 126 | 3 | 0.65270  | 1.95811  | 0.00000   | -2.61082 | 0.00000 | 0.00000 | ; |
| 36 | 37 | 39 | 135 | 3 | 20.92000 | 0.00000  | -20.92000 | 0.00000  | 0.00000 | 0.00000 | ; |
| 37 | 36 | 33 | 131 | 3 | 0.65270  | 1.95811  | 0.00000   | -2.61082 | 0.00000 | 0.00000 | ; |
| 37 | 36 | 33 | 132 | 3 | 0.65270  | 1.95811  | 0.00000   | -2.61082 | 0.00000 | 0.00000 | ; |
| 37 | 36 | 34 | 133 | 3 | 0.65270  | 1.95811  | 0.00000   | -2.61082 | 0.00000 | 0.00000 | ; |
| 37 | 39 | 40 | 136 | 3 | 0.00000  | 0.00000  | 0.00000   | 0.00000  | 0.00000 | 0.00000 | ; |
| 38 | 37 | 36 | 134 | 3 | 3.68192  | -4.35136 | 0.00000   | 1.33888  | 0.00000 | 0.00000 | ; |
| 38 | 37 | 39 | 135 | 3 | 29.28800 | -8.36800 | -20.92000 | 0.00000  | 0.00000 | 0.00000 | ; |
| 39 | 37 | 36 | 134 | 3 | 0.00000  | 0.00000  | 0.00000   | 0.00000  | 0.00000 | 0.00000 | ; |
| 39 | 40 | 41 | 137 | 3 | 0.65270  | 1.95811  | 0.00000   | -2.61082 | 0.00000 | 0.00000 | ; |
| 39 | 40 | 41 | 138 | 3 | 0.65270  | 1.95811  | 0.00000   | -2.61082 | 0.00000 | 0.00000 | ; |
| 40 | 51 | 53 | 145 | 3 | 20.92000 | 0.00000  | -20.92000 | 0.00000  | 0.00000 | 0.00000 | ; |
| 41 | 40 | 39 | 135 | 3 | 0.00000  | 0.00000  | 0.00000   | 0.00000  | 0.00000 | 0.00000 | ; |
| 41 | 42 | 43 | 139 | 3 | 33.47200 | 0.00000  | -33.47200 | 0.00000  | 0.00000 | 0.00000 | ; |
| 42 | 41 | 40 | 136 | 3 | 0.65270  | 1.95811  | 0.00000   | -2.61082 | 0.00000 | 0.00000 | ; |
| 42 | 43 | 44 | 140 | 3 | 14.22560 | 0.00000  | -14.22560 | 0.00000  | 0.00000 | 0.00000 | ; |
| 42 | 46 | 47 | 141 | 3 | 30.33400 | 0.00000  | -30.33400 | 0.00000  | 0.00000 | 0.00000 | ; |
| 43 | 42 | 41 | 137 | 3 | 0.00000  | 0.00000  | 0.00000   | 0.00000  | 0.00000 | 0.00000 | ; |
| 43 | 42 | 41 | 138 | 3 | 0.00000  | 0.00000  | 0.00000   | 0.00000  | 0.00000 | 0.00000 | ; |
| 44 | 45 | 50 | 144 | 3 | 30.33400 | 0.00000  | -30.33400 | 0.00000  | 0.00000 | 0.00000 | ; |
| 45 | 44 | 43 | 139 | 3 | 14.22560 | 0.00000  | -14.22560 | 0.00000  | 0.00000 | 0.00000 | ; |
| 45 | 46 | 47 | 141 | 3 | 30.33400 | 0.00000  | -30.33400 | 0.00000  | 0.00000 | 0.00000 | ; |
| 45 | 50 | 49 | 143 | 3 | 30.33400 | 0.00000  | -30.33400 | 0.00000  | 0.00000 | 0.00000 | ; |
| 46 | 42 | 41 | 137 | 3 | 0.00000  | 0.00000  | 0.00000   | 0.00000  | 0.00000 | 0.00000 | ; |
| 46 | 42 | 41 | 138 | 3 | 0.00000  | 0.00000  | 0.00000   | 0.00000  | 0.00000 | 0.00000 | ; |
| 46 | 42 | 43 | 139 | 3 | 33.47200 | 0.00000  | -33.47200 | 0.00000  | 0.00000 | 0.00000 | ; |
| 46 | 45 | 44 | 140 | 3 | 2.51040  | 0.00000  | -2.51040  | 0.00000  | 0.00000 | 0.00000 | ; |
| 46 | 45 | 50 | 144 | 3 | 30.33400 | 0.00000  | -30.33400 | 0.00000  | 0.00000 | 0.00000 | ; |
| 46 | 47 | 48 | 142 | 3 | 30.33400 | 0.00000  | -30.33400 | 0.00000  | 0.00000 | 0.00000 | ; |
| 47 | 48 | 49 | 143 | 3 | 30.33400 | 0.00000  | -30.33400 | 0.00000  | 0.00000 | 0.00000 | ; |
| 48 | 49 | 50 | 144 | 3 | 30.33400 | 0.00000  | -30.33400 | 0.00000  | 0.00000 | 0.00000 | ; |
| 49 | 48 | 47 | 141 | 3 | 30.33400 | 0.00000  | -30.33400 | 0.00000  | 0.00000 | 0.00000 | ; |
| 50 | 45 | 44 | 140 | 3 | 2.51040  | 0.00000  | -2.51040  | 0.00000  | 0.00000 | 0.00000 | ; |
| 50 | 49 | 48 | 142 | 3 | 30.33400 | 0.00000  | -30.33400 | 0.00000  | 0.00000 | 0.00000 | ; |
| 51 | 40 | 39 | 135 | 3 | 0.00000  | 0.00000  | 0.00000   | 0.00000  | 0.00000 | 0.00000 | ; |
| 51 | 40 | 41 | 137 | 3 | 0.65270  | 1.95811  | 0.00000   | -2.61082 | 0.00000 | 0.00000 | ; |
| 51 | 40 | 41 | 138 | 3 | 0.65270  | 1.95811  | 0.00000   | -2.61082 | 0.00000 | 0.00000 | ; |
| 51 | 53 | 54 | 146 | 3 | 0.00000  | 0.00000  | 0.00000   | 0.00000  | 0.00000 | 0.00000 | ; |
| 52 | 51 | 40 | 136 | 3 | 3.68192  | -4.35136 | 0.00000   | 1.33888  | 0.00000 | 0.00000 | ; |
| 52 | 51 | 53 | 145 | 3 | 29.28800 | -8.36800 | -20.92000 | 0.00000  | 0.00000 | 0.00000 | ; |
| 53 | 51 | 40 | 136 | 3 | 0.00000  | 0.00000  | 0.00000   | 0.00000  | 0.00000 | 0.00000 | ; |
| 53 | 54 | 55 | 147 | 3 | 0.65270  | 1.95811  | 0.00000   | -2.61082 | 0.00000 | 0.00000 | ; |
| 53 | 54 | 55 | 148 | 3 | 0.65270  | 1.95811  | 0.00000   | -2.61082 | 0.00000 | 0.00000 | ; |
| 53 | 54 | 58 | 153 | 3 | 0.65270  | 1.95811  | 0.00000   | -2.61082 | 0.00000 | 0.00000 | ; |
| 54 | 55 | 56 | 149 | 3 | 0.66944  | 2.00832  | 0.00000   | -2.67776 | 0.00000 | 0.00000 | ; |
| 54 | 55 | 56 | 150 | 3 | 0.66944  | 2.00832  | 0.00000   | -2.67776 | 0.00000 | 0.00000 | ; |
| 54 | 58 | 62 | 154 | 3 | 0.66944  | 2.00832  | 0.00000   | -2.67776 | 0.00000 | 0.00000 | ; |
| 55 | 54 | 53 | 145 | 3 | 0.00000  | 0.00000  | 0.00000   | 0.00000  | 0.00000 | 0.00000 | ; |
| 55 | 54 | 58 | 153 | 3 | 0.66944  | 2.00832  | 0.00000   | -2.67776 | 0.00000 | 0.00000 | ; |
| 55 | 56 | 57 | 151 | 3 | 0.66944  | 2.00832  | 0.00000   | -2.67776 | 0.00000 | 0.00000 | ; |
| 55 | 56 | 57 | 152 | 3 | 0.66944  | 2.00832  | 0.00000   | -2.67776 | 0.00000 | 0.00000 | ; |
| 56 | 55 | 54 | 146 | 3 | 0.65270  | 1.95811  | 0.00000   | -2.61082 | 0.00000 | 0.00000 | ; |
| 56 | 57 | 62 | 154 | 3 | 0.66944  | 2.00832  | 0.00000   | -2.67776 | 0.00000 | 0.00000 | ; |
| 57 | 56 | 55 | 147 | 3 | 0.66944  | 2.00832  | 0.00000   | -2.67776 | 0.00000 | 0.00000 | ; |
| 57 | 56 | 55 | 148 | 3 | 0.66944  | 2.00832  | 0.00000   | -2.67776 | 0.00000 | 0.00000 | ; |
| 57 | 62 | 58 | 153 | 3 | 0.66944  | 2.00832  | 0.00000   | -2.67776 | 0.00000 | 0.00000 | ; |
| 58 | 54 | 53 | 145 | 3 | 0.00000  | 0.00000  | 0.00000   | 0.00000  | 0.00000 | 0.00000 | ; |
| 58 | 54 | 55 | 147 | 3 | 0.66944  | 2.00832  | 0.00000   | -2.67776 | 0.00000 | 0.00000 | ; |
| 58 | 54 | 55 | 148 | 3 | 0.66944  | 2.00832  | 0.00000   | -2.67776 | 0.00000 | 0.00000 | ; |
| 58 | 62 | 57 | 151 | 3 | 0.66944  | 2.00832  | 0.00000   | -2.67776 | 0.00000 | 0.00000 | ; |
| 58 | 62 | 57 | 152 | 3 | 0.66944  | 2.00832  | 0.00000   | -2.67776 | 0.00000 | 0.00000 | ; |
| 59 | 58 | 54 | 146 | 3 | 0.65270  | 1.95811  | 0.00000   | -2.61082 | 0.00000 | 0.00000 | ; |
| 59 | 58 | 62 | 154 | 3 | 0.65270  | 1.95811  | 0.00000   | -2.61082 | 0.00000 | 0.00000 | ; |
| 60 | 59 | 58 | 153 | 3 | 3.68192  | -4.35136 | 0.00000   | 1.33888  | 0.00000 | 0.00000 | ; |
| 61 | 59 | 58 | 153 | 3 | 3.68192  | -4.35136 | 0.00000   | 1.33888  | 0.00000 | 0.00000 | ; |
| 62 | 57 | 56 | 149 | 3 | 0.66944  | 2.00832  | 0.00000   | -2.67776 | 0.00000 | 0.00000 | ; |
| 62 | 57 | 56 | 150 | 3 | 0.66944  | 2.00832  | 0.00000   | -2.67776 | 0.00000 | 0.00000 | ; |
| 62 | 58 | 54 | 146 | 3 | 0.65270  | 1.95811  | 0.00000   | -2.61082 | 0.00000 | 0.00000 | ; |
| 62 | 63 | 65 | 155 | 3 | 20.92000 | 0.00000  | -20.92000 | 0.00000  | 0.00000 | 0.00000 | ; |
| 63 | 62 | 57 | 151 | 3 | 0.65270  | 1.95811  | 0.00000   | -2.61082 | 0.00000 | 0.00000 | ; |
| 63 | 62 | 57 | 152 | 3 | 0.65270  | 1.95811  | 0.00000   | -2.61082 | 0.00000 | 0.00000 | ; |
| 63 | 62 | 58 | 153 | 3 | 0.65270  | 1.95811  | 0.00000   | -2.61082 | 0.00000 | 0.00000 | ; |
| 63 | 65 | 66 | 156 | 3 | 0.00000  | 0.00000  | 0.00000   | 0.00000  | 0.00000 | 0.00000 | ; |
| 64 | 63 | 62 | 154 | 3 | 3.68192  | -4.35136 | 0.00000   | 1.33888  | 0.00000 | 0.00000 | ; |
| 64 | 63 | 65 | 155 | 3 | 29.28800 | -8.36800 | -20.92000 | 0.00000  | 0.00000 | 0.00000 | ; |
| 65 | 63 | 62 | 154 | 3 | 0.00000  | 0.00000  | 0.00000   | 0.00000  | 0.00000 | 0.00000 | ; |
| 65 | 66 | 67 | 157 | 3 | 0.65270  | 1.95811  | 0.00000   | -2.61082 | 0.00000 | 0.00000 | ; |
| 65 | 66 | 67 | 158 | 3 | 0.65270  | 1.95811  | 0.00000   | -2.61082 | 0.00000 | 0.00000 | ; |
| 66 | 77 | 79 | 165 | 3 | 20.92000 | 0.00000  | -20.92000 | 0.00000  | 0.00000 | 0.00000 | ; |
| 67 | 66 | 65 | 155 | 3 | 0.00000  | 0.00000  | 0.00000   | 0.00000  | 0.00000 | 0.00000 | ; |
| 67 | 68 | 69 | 159 | 3 | 33.47200 | 0.00000  | -33.47200 | 0.00000  | 0.00000 | 0.00000 | ; |
| 68 | 67 | 66 | 156 | 3 | 0.65270  | 1.95811  | 0.00000   | -2.61082 | 0.00000 | 0.00000 | ; |
| 68 | 69 | 70 | 160 | 3 | 14.22560 | 0.00000  | -14.22560 | 0.00000  | 0.00000 | 0.00000 | ; |
| 68 | 72 | 73 | 161 | 3 | 30.33400 | 0.00000  | -30.33400 | 0.00000  | 0.00000 | 0.00000 | ; |
| 69 | 68 | 67 | 157 | 3 | 0.00000  | 0.00000  | 0.00000   | 0.00000  | 0.00000 | 0.00000 | ; |
| 69 | 68 | 67 | 158 | 3 | 0.00000  | 0.00000  | 0.00000   | 0.00000  | 0.00000 | 0.00000 | ; |
| 70 | 71 | 76 | 164 | 3 | 30.33400 | 0.00000  | -30.33400 | 0.00000  | 0.00000 | 0.00000 | ; |
| 71 | 70 | 69 | 159 | 3 | 14.22560 | 0.00000  | -14.22560 | 0.00000  | 0.00000 | 0.00000 | ; |
| 71 | 72 | 73 | 161 | 3 | 30.33400 | 0.00000  | -30.33400 | 0.00000  | 0.00000 | 0.00000 | ; |
| 71 | 76 | 75 | 163 | 3 | 30.33400 | 0.00000  | -30.33400 | 0.00000  | 0.00000 | 0.00000 | ; |
| 72 | 68 | 67 | 157 | 3 | 0.00000  | 0.00000  | 0.00000   | 0.00000  | 0.00000 | 0.00000 | ; |
| 72 | 68 | 67 | 158 | 3 | 0.00000  | 0.00000  | 0.00000   | 0.00000  | 0.00000 | 0.00000 | ; |
| 72 | 68 | 69 | 159 | 3 | 33.47200 | 0.00000  | -33.47200 | 0.00000  | 0.00000 | 0.00000 | ; |
| 72 | 71 | 70 | 160 | 3 | 2.51040  | 0.00000  | -2.51040  | 0.00000  | 0.00000 | 0.00000 | ; |
| 72 | 71 | 76 | 164 | 3 | 30.33400 | 0.00000  | -30.33400 | 0.00000  | 0.00000 | 0.00000 | ; |
| 72 | 73 | 74 | 162 | 3 | 30.33400 | 0.00000  | -30.33400 | 0.00000  | 0.00000 | 0.00000 | ; |
| 73 | 74 | 75 | 163 | 3 | 30.33400 | 0.00000  | -30.33400 | 0.00000  | 0.00000 | 0.00000 |   |

|     |     |     |     |   |          |          |           |          |         |         |   |
|-----|-----|-----|-----|---|----------|----------|-----------|----------|---------|---------|---|
| 77  | 79  | 80  | 166 | 3 | 0.00000  | 0.00000  | 0.00000   | 0.00000  | 0.00000 | 0.00000 | ; |
| 78  | 77  | 66  | 156 | 3 | 3.68192  | -4.35136 | 0.00000   | 1.33888  | 0.00000 | 0.00000 | ; |
| 78  | 77  | 79  | 165 | 3 | 29.28800 | -8.36800 | -20.92000 | 0.00000  | 0.00000 | 0.00000 | ; |
| 79  | 77  | 66  | 156 | 3 | 0.00000  | 0.00000  | 0.00000   | 0.00000  | 0.00000 | 0.00000 | ; |
| 79  | 80  | 81  | 167 | 3 | 0.65270  | 1.95811  | 0.00000   | -2.61082 | 0.00000 | 0.00000 | ; |
| 79  | 80  | 81  | 168 | 3 | 0.65270  | 1.95811  | 0.00000   | -2.61082 | 0.00000 | 0.00000 | ; |
| 79  | 80  | 84  | 173 | 3 | 0.65270  | 1.95811  | 0.00000   | -2.61082 | 0.00000 | 0.00000 | ; |
| 80  | 81  | 82  | 169 | 3 | 0.66944  | 2.00832  | 0.00000   | -2.67776 | 0.00000 | 0.00000 | ; |
| 80  | 81  | 82  | 170 | 3 | 0.66944  | 2.00832  | 0.00000   | -2.67776 | 0.00000 | 0.00000 | ; |
| 80  | 84  | 86  | 174 | 3 | 0.66944  | 2.00832  | 0.00000   | -2.67776 | 0.00000 | 0.00000 | ; |
| 81  | 80  | 79  | 165 | 3 | 0.00000  | 0.00000  | 0.00000   | 0.00000  | 0.00000 | 0.00000 | ; |
| 81  | 80  | 84  | 173 | 3 | 0.66944  | 2.00832  | 0.00000   | -2.67776 | 0.00000 | 0.00000 | ; |
| 81  | 82  | 83  | 171 | 3 | 0.66944  | 2.00832  | 0.00000   | -2.67776 | 0.00000 | 0.00000 | ; |
| 81  | 82  | 83  | 172 | 3 | 0.66944  | 2.00832  | 0.00000   | -2.67776 | 0.00000 | 0.00000 | ; |
| 82  | 81  | 80  | 166 | 3 | 0.65270  | 1.95811  | 0.00000   | -2.61082 | 0.00000 | 0.00000 | ; |
| 82  | 83  | 86  | 174 | 3 | 0.66944  | 2.00832  | 0.00000   | -2.67776 | 0.00000 | 0.00000 | ; |
| 83  | 82  | 81  | 167 | 3 | 0.66944  | 2.00832  | 0.00000   | -2.67776 | 0.00000 | 0.00000 | ; |
| 83  | 82  | 81  | 168 | 3 | 0.66944  | 2.00832  | 0.00000   | -2.67776 | 0.00000 | 0.00000 | ; |
| 83  | 86  | 84  | 173 | 3 | 0.66944  | 2.00832  | 0.00000   | -2.67776 | 0.00000 | 0.00000 | ; |
| 84  | 80  | 79  | 165 | 3 | 0.00000  | 0.00000  | 0.00000   | 0.00000  | 0.00000 | 0.00000 | ; |
| 84  | 80  | 81  | 167 | 3 | 0.66944  | 2.00832  | 0.00000   | -2.67776 | 0.00000 | 0.00000 | ; |
| 84  | 80  | 81  | 168 | 3 | 0.66944  | 2.00832  | 0.00000   | -2.67776 | 0.00000 | 0.00000 | ; |
| 84  | 86  | 83  | 171 | 3 | 0.66944  | 2.00832  | 0.00000   | -2.67776 | 0.00000 | 0.00000 | ; |
| 84  | 86  | 83  | 172 | 3 | 0.66944  | 2.00832  | 0.00000   | -2.67776 | 0.00000 | 0.00000 | ; |
| 85  | 84  | 80  | 166 | 3 | 0.65270  | 1.95811  | 0.00000   | -2.61082 | 0.00000 | 0.00000 | ; |
| 85  | 84  | 86  | 174 | 3 | 0.65270  | 1.95811  | 0.00000   | -2.61082 | 0.00000 | 0.00000 | ; |
| 86  | 83  | 82  | 169 | 3 | 0.66944  | 2.00832  | 0.00000   | -2.67776 | 0.00000 | 0.00000 | ; |
| 86  | 83  | 82  | 170 | 3 | 0.66944  | 2.00832  | 0.00000   | -2.67776 | 0.00000 | 0.00000 | ; |
| 86  | 84  | 80  | 166 | 3 | 0.65270  | 1.95811  | 0.00000   | -2.61082 | 0.00000 | 0.00000 | ; |
| 86  | 87  | 89  | 175 | 3 | 20.92000 | 0.00000  | -20.92000 | 0.00000  | 0.00000 | 0.00000 | ; |
| 87  | 86  | 83  | 171 | 3 | 0.65270  | 1.95811  | 0.00000   | -2.61082 | 0.00000 | 0.00000 | ; |
| 87  | 86  | 83  | 172 | 3 | 0.65270  | 1.95811  | 0.00000   | -2.61082 | 0.00000 | 0.00000 | ; |
| 87  | 86  | 84  | 173 | 3 | 0.65270  | 1.95811  | 0.00000   | -2.61082 | 0.00000 | 0.00000 | ; |
| 87  | 89  | 90  | 176 | 3 | 0.00000  | 0.00000  | 0.00000   | 0.00000  | 0.00000 | 0.00000 | ; |
| 88  | 87  | 86  | 174 | 3 | 3.68192  | -4.35136 | 0.00000   | 1.33888  | 0.00000 | 0.00000 | ; |
| 88  | 87  | 89  | 175 | 3 | 29.28800 | -8.36800 | -20.92000 | 0.00000  | 0.00000 | 0.00000 | ; |
| 89  | 87  | 86  | 174 | 3 | 0.00000  | 0.00000  | 0.00000   | 0.00000  | 0.00000 | 0.00000 | ; |
| 89  | 90  | 91  | 177 | 3 | 0.65270  | 1.95811  | 0.00000   | -2.61082 | 0.00000 | 0.00000 | ; |
| 89  | 90  | 91  | 178 | 3 | 0.65270  | 1.95811  | 0.00000   | -2.61082 | 0.00000 | 0.00000 | ; |
| 90  | 8   | 7   | 110 | 3 | 20.92000 | 0.00000  | -20.92000 | 0.00000  | 0.00000 | 0.00000 | ; |
| 91  | 90  | 89  | 175 | 3 | 0.00000  | 0.00000  | 0.00000   | 0.00000  | 0.00000 | 0.00000 | ; |
| 91  | 92  | 93  | 179 | 3 | 33.47200 | 0.00000  | -33.47200 | 0.00000  | 0.00000 | 0.00000 | ; |
| 92  | 91  | 90  | 176 | 3 | 0.65270  | 1.95811  | 0.00000   | -2.61082 | 0.00000 | 0.00000 | ; |
| 92  | 93  | 94  | 180 | 3 | 14.22560 | 0.00000  | -14.22560 | 0.00000  | 0.00000 | 0.00000 | ; |
| 92  | 96  | 97  | 181 | 3 | 30.33400 | 0.00000  | -30.33400 | 0.00000  | 0.00000 | 0.00000 | ; |
| 93  | 92  | 91  | 177 | 3 | 0.00000  | 0.00000  | 0.00000   | 0.00000  | 0.00000 | 0.00000 | ; |
| 93  | 92  | 91  | 178 | 3 | 0.00000  | 0.00000  | 0.00000   | 0.00000  | 0.00000 | 0.00000 | ; |
| 94  | 95  | 100 | 184 | 3 | 30.33400 | 0.00000  | -30.33400 | 0.00000  | 0.00000 | 0.00000 | ; |
| 95  | 94  | 93  | 179 | 3 | 14.22560 | 0.00000  | -14.22560 | 0.00000  | 0.00000 | 0.00000 | ; |
| 95  | 96  | 97  | 181 | 3 | 30.33400 | 0.00000  | -30.33400 | 0.00000  | 0.00000 | 0.00000 | ; |
| 95  | 100 | 99  | 183 | 3 | 30.33400 | 0.00000  | -30.33400 | 0.00000  | 0.00000 | 0.00000 | ; |
| 96  | 92  | 91  | 177 | 3 | 0.00000  | 0.00000  | 0.00000   | 0.00000  | 0.00000 | 0.00000 | ; |
| 96  | 92  | 91  | 178 | 3 | 0.00000  | 0.00000  | 0.00000   | 0.00000  | 0.00000 | 0.00000 | ; |
| 96  | 92  | 93  | 179 | 3 | 33.47200 | 0.00000  | -33.47200 | 0.00000  | 0.00000 | 0.00000 | ; |
| 96  | 95  | 94  | 180 | 3 | 2.51040  | 0.00000  | -2.51040  | 0.00000  | 0.00000 | 0.00000 | ; |
| 96  | 95  | 100 | 184 | 3 | 30.33400 | 0.00000  | -30.33400 | 0.00000  | 0.00000 | 0.00000 | ; |
| 96  | 97  | 98  | 182 | 3 | 30.33400 | 0.00000  | -30.33400 | 0.00000  | 0.00000 | 0.00000 | ; |
| 97  | 98  | 99  | 183 | 3 | 30.33400 | 0.00000  | -30.33400 | 0.00000  | 0.00000 | 0.00000 | ; |
| 98  | 99  | 100 | 184 | 3 | 30.33400 | 0.00000  | -30.33400 | 0.00000  | 0.00000 | 0.00000 | ; |
| 99  | 98  | 97  | 181 | 3 | 30.33400 | 0.00000  | -30.33400 | 0.00000  | 0.00000 | 0.00000 | ; |
| 100 | 95  | 94  | 180 | 3 | 2.51040  | 0.00000  | -2.51040  | 0.00000  | 0.00000 | 0.00000 | ; |
| 100 | 99  | 98  | 182 | 3 | 30.33400 | 0.00000  | -30.33400 | 0.00000  | 0.00000 | 0.00000 | ; |
| 101 | 35  | 34  | 133 | 3 | 3.68192  | -4.35136 | 0.00000   | 1.33888  | 0.00000 | 0.00000 | ; |
| 102 | 85  | 84  | 173 | 3 | 3.68192  | -4.35136 | 0.00000   | 1.33888  | 0.00000 | 0.00000 | ; |
| 103 | 35  | 34  | 133 | 3 | 3.68192  | -4.35136 | 0.00000   | 1.33888  | 0.00000 | 0.00000 | ; |
| 104 | 85  | 84  | 173 | 3 | 3.68192  | -4.35136 | 0.00000   | 1.33888  | 0.00000 | 0.00000 | ; |
| 105 | 1   | 2   | 106 | 3 | 0.00000  | 0.00000  | 0.00000   | 0.00000  | 0.00000 | 0.00000 | ; |
| 105 | 1   | 17  | 117 | 3 | 0.65270  | 1.95811  | 0.00000   | -2.61082 | 0.00000 | 0.00000 | ; |
| 105 | 1   | 17  | 118 | 3 | 0.65270  | 1.95811  | 0.00000   | -2.61082 | 0.00000 | 0.00000 | ; |
| 107 | 4   | 5   | 108 | 3 | 0.62760  | 1.88280  | 0.00000   | -2.51040 | 0.00000 | 0.00000 | ; |
| 107 | 4   | 12  | 115 | 3 | 0.62760  | 1.88280  | 0.00000   | -2.51040 | 0.00000 | 0.00000 | ; |
| 107 | 4   | 12  | 116 | 3 | 0.62760  | 1.88280  | 0.00000   | -2.51040 | 0.00000 | 0.00000 | ; |
| 108 | 5   | 6   | 109 | 3 | 0.65270  | 1.95811  | 0.00000   | -2.61082 | 0.00000 | 0.00000 | ; |
| 109 | 6   | 7   | 110 | 3 | 0.00000  | 0.00000  | 0.00000   | 0.00000  | 0.00000 | 0.00000 | ; |
| 109 | 6   | 10  | 111 | 3 | 0.65270  | 1.95811  | 0.00000   | -2.61082 | 0.00000 | 0.00000 | ; |
| 109 | 6   | 10  | 112 | 3 | 0.65270  | 1.95811  | 0.00000   | -2.61082 | 0.00000 | 0.00000 | ; |
| 111 | 10  | 11  | 113 | 3 | 0.62760  | 1.88280  | 0.00000   | -2.51040 | 0.00000 | 0.00000 | ; |
| 111 | 10  | 11  | 114 | 3 | 0.62760  | 1.88280  | 0.00000   | -2.51040 | 0.00000 | 0.00000 | ; |
| 112 | 10  | 11  | 113 | 3 | 0.62760  | 1.88280  | 0.00000   | -2.51040 | 0.00000 | 0.00000 | ; |
| 112 | 10  | 11  | 114 | 3 | 0.62760  | 1.88280  | 0.00000   | -2.51040 | 0.00000 | 0.00000 | ; |
| 113 | 11  | 12  | 115 | 3 | 0.62760  | 1.88280  | 0.00000   | -2.51040 | 0.00000 | 0.00000 | ; |
| 113 | 11  | 12  | 116 | 3 | 0.62760  | 1.88280  | 0.00000   | -2.51040 | 0.00000 | 0.00000 | ; |
| 114 | 11  | 12  | 115 | 3 | 0.62760  | 1.88280  | 0.00000   | -2.51040 | 0.00000 | 0.00000 | ; |
| 114 | 11  | 12  | 116 | 3 | 0.62760  | 1.88280  | 0.00000   | -2.51040 | 0.00000 | 0.00000 | ; |
| 119 | 19  | 20  | 120 | 3 | 14.22560 | 0.00000  | -14.22560 | 0.00000  | 0.00000 | 0.00000 | ; |
| 121 | 23  | 24  | 122 | 3 | 30.33400 | 0.00000  | -30.33400 | 0.00000  | 0.00000 | 0.00000 | ; |
| 122 | 24  | 25  | 123 | 3 | 30.33400 | 0.00000  | -30.33400 | 0.00000  | 0.00000 | 0.00000 | ; |
| 123 | 25  | 26  | 124 | 3 | 30.33400 | 0.00000  | -30.33400 | 0.00000  | 0.00000 | 0.00000 | ; |
| 125 | 29  | 30  | 126 | 3 | 0.00000  | 0.00000  | 0.00000   | 0.00000  | 0.00000 | 0.00000 | ; |
| 126 | 30  | 31  | 127 | 3 | 0.65270  | 1.95811  | 0.00000   | -2.61082 | 0.00000 | 0.00000 | ; |
| 126 | 30  | 31  | 128 | 3 | 0.65270  | 1.95811  | 0.00000   | -2.61082 | 0.00000 | 0.00000 | ; |
| 126 | 30  | 34  | 133 | 3 | 0.65270  | 1.95811  | 0.00000   | -2.61082 | 0.00000 | 0.00000 | ; |
| 127 | 31  | 32  | 129 | 3 | 0.62760  | 1.88280  | 0.00000   | -2.51040 | 0.00000 | 0.00000 | ; |
| 127 | 31  | 32  | 130 | 3 | 0.62760  | 1.88280  | 0.00000   | -2.51040 | 0.00000 | 0.00000 | ; |
| 128 | 31  | 32  | 129 | 3 | 0.62760  | 1.88280  | 0.00000   | -2.51040 | 0.00000 | 0.00000 | ; |
| 128 | 31  | 32  | 130 | 3 | 0.62760  | 1.88280  | 0.00000   | -2.51040 | 0.00000 | 0.00000 | ; |
| 129 | 32  | 33  | 131 | 3 | 0.62760  | 1.88280  | 0.00000   | -2.51040 | 0.00000 | 0.00000 | ; |
| 129 | 32  | 33  | 132 | 3 | 0.62760  | 1.88280  | 0.00000   | -2.51040 | 0.00000 | 0.00000 | ; |
| 130 | 32  | 33  | 131 | 3 | 0.62760  | 1.88280  | 0.00000   | -2.51040 | 0.00000 | 0.00000 | ; |
| 130 | 32  | 33  | 132 | 3 | 0.62760  | 1.88280  | 0.00000   | -2.51040 | 0.00000 | 0.00000 | ; |
| 131 | 33  | 36  | 134 | 3 | 0.62760  | 1.88280  | 0.00000   | -2.51040 | 0.00000 | 0.00000 | ; |
| 132 | 33  | 36  | 134 | 3 | 0.62760  | 1.88280  | 0.00000   | -2.51040 | 0.00000 | 0.00000 | ; |
| 133 | 34  | 36  | 134 | 3 | 0.62760  | 1.88280  | 0.00000   | -2.51040 | 0.00000 | 0.00000 | ; |
| 135 | 39  | 40  | 136 | 3 | 0.00000  | 0.00000  | 0.00000   | 0.00000  | 0.00000 | 0.00000 | ; |
| 136 | 40  | 41  | 137 | 3 | 0.65270  | 1.95811  | 0.00000   | -2.61082 | 0.00000 | 0.      |   |

|     |     |     |     |   |          |          |           |          |           |         |   |
|-----|-----|-----|-----|---|----------|----------|-----------|----------|-----------|---------|---|
| 146 | 54  | 58  | 153 | 3 | 0.65270  | 1.95811  | 0.00000   | -2.61082 | 0.00000   | 0.00000 | ; |
| 147 | 55  | 56  | 149 | 3 | 0.62760  | 1.88280  | 0.00000   | -2.51040 | 0.00000   | 0.00000 | ; |
| 147 | 55  | 56  | 150 | 3 | 0.62760  | 1.88280  | 0.00000   | -2.51040 | 0.00000   | 0.00000 | ; |
| 148 | 55  | 56  | 149 | 3 | 0.62760  | 1.88280  | 0.00000   | -2.51040 | 0.00000   | 0.00000 | ; |
| 148 | 55  | 56  | 150 | 3 | 0.62760  | 1.88280  | 0.00000   | -2.51040 | 0.00000   | 0.00000 | ; |
| 149 | 56  | 57  | 151 | 3 | 0.62760  | 1.88280  | 0.00000   | -2.51040 | 0.00000   | 0.00000 | ; |
| 149 | 56  | 57  | 152 | 3 | 0.62760  | 1.88280  | 0.00000   | -2.51040 | 0.00000   | 0.00000 | ; |
| 150 | 56  | 57  | 151 | 3 | 0.62760  | 1.88280  | 0.00000   | -2.51040 | 0.00000   | 0.00000 | ; |
| 150 | 56  | 57  | 152 | 3 | 0.62760  | 1.88280  | 0.00000   | -2.51040 | 0.00000   | 0.00000 | ; |
| 151 | 57  | 62  | 154 | 3 | 0.62760  | 1.88280  | 0.00000   | -2.51040 | 0.00000   | 0.00000 | ; |
| 152 | 57  | 62  | 154 | 3 | 0.62760  | 1.88280  | 0.00000   | -2.51040 | 0.00000   | 0.00000 | ; |
| 153 | 58  | 62  | 154 | 3 | 0.62760  | 1.88280  | 0.00000   | -2.51040 | 0.00000   | 0.00000 | ; |
| 155 | 65  | 66  | 156 | 3 | 0.00000  | 0.00000  | 0.00000   | 0.00000  | 0.00000   | 0.00000 | ; |
| 156 | 66  | 67  | 157 | 3 | 0.65270  | 1.95811  | 0.00000   | -2.61082 | 0.00000   | 0.00000 | ; |
| 156 | 66  | 67  | 158 | 3 | 0.65270  | 1.95811  | 0.00000   | -2.61082 | 0.00000   | 0.00000 | ; |
| 159 | 69  | 70  | 160 | 3 | 14.22560 | 0.00000  | -14.22560 | 0.00000  | 0.00000   | 0.00000 | ; |
| 161 | 73  | 74  | 162 | 3 | 30.33400 | 0.00000  | -30.33400 | 0.00000  | 0.00000   | 0.00000 | ; |
| 162 | 74  | 75  | 163 | 3 | 30.33400 | 0.00000  | -30.33400 | 0.00000  | 0.00000   | 0.00000 | ; |
| 163 | 75  | 76  | 164 | 3 | 30.33400 | 0.00000  | -30.33400 | 0.00000  | 0.00000   | 0.00000 | ; |
| 165 | 79  | 80  | 166 | 3 | 0.00000  | 0.00000  | 0.00000   | 0.00000  | 0.00000   | 0.00000 | ; |
| 166 | 80  | 81  | 167 | 3 | 0.65270  | 1.95811  | 0.00000   | -2.61082 | 0.00000   | 0.00000 | ; |
| 166 | 80  | 81  | 168 | 3 | 0.65270  | 1.95811  | 0.00000   | -2.61082 | 0.00000   | 0.00000 | ; |
| 166 | 80  | 84  | 173 | 3 | 0.65270  | 1.95811  | 0.00000   | -2.61082 | 0.00000   | 0.00000 | ; |
| 167 | 81  | 82  | 169 | 3 | 0.62760  | 1.88280  | 0.00000   | -2.51040 | 0.00000   | 0.00000 | ; |
| 167 | 81  | 82  | 170 | 3 | 0.62760  | 1.88280  | 0.00000   | -2.51040 | 0.00000   | 0.00000 | ; |
| 168 | 81  | 82  | 169 | 3 | 0.62760  | 1.88280  | 0.00000   | -2.51040 | 0.00000   | 0.00000 | ; |
| 168 | 81  | 82  | 170 | 3 | 0.62760  | 1.88280  | 0.00000   | -2.51040 | 0.00000   | 0.00000 | ; |
| 169 | 82  | 83  | 171 | 3 | 0.62760  | 1.88280  | 0.00000   | -2.51040 | 0.00000   | 0.00000 | ; |
| 169 | 82  | 83  | 172 | 3 | 0.62760  | 1.88280  | 0.00000   | -2.51040 | 0.00000   | 0.00000 | ; |
| 170 | 82  | 83  | 171 | 3 | 0.62760  | 1.88280  | 0.00000   | -2.51040 | 0.00000   | 0.00000 | ; |
| 170 | 82  | 83  | 172 | 3 | 0.62760  | 1.88280  | 0.00000   | -2.51040 | 0.00000   | 0.00000 | ; |
| 171 | 83  | 86  | 174 | 3 | 0.62760  | 1.88280  | 0.00000   | -2.51040 | 0.00000   | 0.00000 | ; |
| 172 | 83  | 86  | 174 | 3 | 0.62760  | 1.88280  | 0.00000   | -2.51040 | 0.00000   | 0.00000 | ; |
| 173 | 84  | 86  | 174 | 3 | 0.62760  | 1.88280  | 0.00000   | -2.51040 | 0.00000   | 0.00000 | ; |
| 175 | 89  | 90  | 176 | 3 | 0.00000  | 0.00000  | 0.00000   | 0.00000  | 0.00000   | 0.00000 | ; |
| 176 | 90  | 91  | 177 | 3 | 0.65270  | 1.95811  | 0.00000   | -2.61082 | 0.00000   | 0.00000 | ; |
| 176 | 90  | 91  | 178 | 3 | 0.65270  | 1.95811  | 0.00000   | -2.61082 | 0.00000   | 0.00000 | ; |
| 179 | 93  | 94  | 180 | 3 | 14.22560 | 0.00000  | -14.22560 | 0.00000  | 0.00000   | 0.00000 | ; |
| 181 | 97  | 98  | 182 | 3 | 30.33400 | 0.00000  | -30.33400 | 0.00000  | 0.00000   | 0.00000 | ; |
| 182 | 98  | 99  | 183 | 3 | 30.33400 | 0.00000  | -30.33400 | 0.00000  | 0.00000   | 0.00000 | ; |
| 183 | 99  | 100 | 184 | 3 | 30.33400 | 0.00000  | -30.33400 | 0.00000  | 0.00000   | 0.00000 | ; |
| 3   | 1   | 2   | 106 | 3 | 9.20480  | 0.00000  | -9.20480  | 0.00000  | 0.00000   | 0.00000 | ; |
| 8   | 6   | 7   | 110 | 3 | 9.20480  | 0.00000  | -9.20480  | 0.00000  | 0.00000   | 0.00000 | ; |
| 18  | 119 | 19  | 20  | 3 | 9.20480  | 0.00000  | -9.20480  | 0.00000  | 0.00000   | 0.00000 | ; |
| 21  | 19  | 20  | 120 | 3 | 9.20480  | 0.00000  | -9.20480  | 0.00000  | 0.00000   | 0.00000 | ; |
| 22  | 24  | 23  | 121 | 3 | 9.20480  | 0.00000  | -9.20480  | 0.00000  | 0.00000   | 0.00000 | ; |
| 23  | 25  | 24  | 122 | 3 | 9.20480  | 0.00000  | -9.20480  | 0.00000  | 0.00000   | 0.00000 | ; |
| 24  | 26  | 25  | 123 | 3 | 9.20480  | 0.00000  | -9.20480  | 0.00000  | 0.00000   | 0.00000 | ; |
| 21  | 25  | 26  | 124 | 3 | 9.20480  | 0.00000  | -9.20480  | 0.00000  | 0.00000   | 0.00000 | ; |
| 27  | 30  | 29  | 125 | 3 | 9.20480  | 0.00000  | -9.20480  | 0.00000  | 0.00000   | 0.00000 | ; |
| 37  | 40  | 39  | 135 | 3 | 9.20480  | 0.00000  | -9.20480  | 0.00000  | 0.00000   | 0.00000 | ; |
| 42  | 139 | 43  | 44  | 3 | 9.20480  | 0.00000  | -9.20480  | 0.00000  | 0.00000   | 0.00000 | ; |
| 45  | 43  | 44  | 140 | 3 | 9.20480  | 0.00000  | -9.20480  | 0.00000  | 0.00000   | 0.00000 | ; |
| 46  | 48  | 47  | 141 | 3 | 9.20480  | 0.00000  | -9.20480  | 0.00000  | 0.00000   | 0.00000 | ; |
| 47  | 49  | 48  | 142 | 3 | 9.20480  | 0.00000  | -9.20480  | 0.00000  | 0.00000   | 0.00000 | ; |
| 48  | 50  | 49  | 143 | 3 | 9.20480  | 0.00000  | -9.20480  | 0.00000  | 0.00000   | 0.00000 | ; |
| 45  | 49  | 50  | 144 | 3 | 9.20480  | 0.00000  | -9.20480  | 0.00000  | 0.00000   | 0.00000 | ; |
| 51  | 54  | 53  | 145 | 3 | 9.20480  | 0.00000  | -9.20480  | 0.00000  | 0.00000   | 0.00000 | ; |
| 63  | 66  | 65  | 155 | 3 | 9.20480  | 0.00000  | -9.20480  | 0.00000  | 0.00000   | 0.00000 | ; |
| 68  | 159 | 69  | 70  | 3 | 9.20480  | 0.00000  | -9.20480  | 0.00000  | 0.00000   | 0.00000 | ; |
| 71  | 69  | 70  | 160 | 3 | 9.20480  | 0.00000  | -9.20480  | 0.00000  | 0.00000   | 0.00000 | ; |
| 72  | 74  | 73  | 161 | 3 | 9.20480  | 0.00000  | -9.20480  | 0.00000  | 0.00000   | 0.00000 | ; |
| 73  | 75  | 74  | 162 | 3 | 9.20480  | 0.00000  | -9.20480  | 0.00000  | 0.00000   | 0.00000 | ; |
| 74  | 76  | 75  | 163 | 3 | 9.20480  | 0.00000  | -9.20480  | 0.00000  | 0.00000   | 0.00000 | ; |
| 71  | 75  | 76  | 164 | 3 | 9.20480  | 0.00000  | -9.20480  | 0.00000  | 0.00000   | 0.00000 | ; |
| 77  | 80  | 79  | 165 | 3 | 9.20480  | 0.00000  | -9.20480  | 0.00000  | 0.00000   | 0.00000 | ; |
| 87  | 90  | 89  | 175 | 3 | 9.20480  | 0.00000  | -9.20480  | 0.00000  | 0.00000   | 0.00000 | ; |
| 92  | 179 | 93  | 94  | 3 | 9.20480  | 0.00000  | -9.20480  | 0.00000  | 0.00000   | 0.00000 | ; |
| 95  | 93  | 94  | 180 | 3 | 9.20480  | 0.00000  | -9.20480  | 0.00000  | 0.00000   | 0.00000 | ; |
| 96  | 98  | 97  | 181 | 3 | 9.20480  | 0.00000  | -9.20480  | 0.00000  | 0.00000   | 0.00000 | ; |
| 97  | 99  | 98  | 182 | 3 | 9.20480  | 0.00000  | -9.20480  | 0.00000  | 0.00000   | 0.00000 | ; |
| 98  | 100 | 99  | 183 | 3 | 9.20480  | 0.00000  | -9.20480  | 0.00000  | 0.00000   | 0.00000 | ; |
| 95  | 99  | 100 | 184 | 3 | 9.20480  | 0.00000  | -9.20480  | 0.00000  | 0.00000   | 0.00000 | ; |
| 1   | 2   | 3   | 4   | 3 | 6.27600  | 6.27600  | 0.00000   | 0.00000  | 0.00000   | 0.00000 | ; |
| 1   | 2   | 3   | 16  | 3 | 20.92000 | 0.00000  | -20.92000 | 0.00000  | 0.00000   | 0.00000 | ; |
| 1   | 17  | 18  | 19  | 3 | 0.00000  | 0.00000  | 0.00000   | 0.00000  | 0.00000   | 0.00000 | ; |
| 1   | 17  | 18  | 22  | 3 | 0.00000  | 0.00000  | 0.00000   | 0.00000  | 0.00000   | 0.00000 | ; |
| 1   | 27  | 29  | 30  | 3 | 6.27600  | 6.27600  | 0.00000   | 0.00000  | 0.00000   | 0.00000 | ; |
| 2   | 1   | 17  | 18  | 3 | 0.65270  | 1.95811  | 0.00000   | -2.61082 | 0.00000   | 0.00000 | ; |
| 2   | 1   | 27  | 28  | 3 | 0.00000  | 0.00000  | 0.00000   | 0.00000  | 0.00000   | 0.00000 | ; |
| 2   | 1   | 27  | 29  | 3 | 23.84880 | 7.11280  | -16.73600 | 0.00000  | 0.00000   | 0.00000 | ; |
| 2   | 3   | 4   | 5   | 3 | 0.83680  | 0.00000  | -2.76144  | 0.00000  | 3.34720   | 0.00000 | ; |
| 2   | 3   | 4   | 12  | 3 | 0.83680  | 0.00000  | -2.76144  | 0.00000  | 3.34720   | 0.00000 | ; |
| 17  | 1   | 2   | 3   | 3 | 2.84512  | -4.10032 | 16.73600  | 2.51040  | -16.73600 | 0.00000 | ; |
| 27  | 1   | 2   | 3   | 3 | 10.46000 | -3.34720 | 0.00000   | 0.00000  | 0.00000   | 0.00000 | ; |
| 3   | 4   | 5   | 6   | 3 | 0.65270  | 1.95811  | 0.00000   | -2.61082 | 0.00000   | 0.00000 | ; |
| 3   | 4   | 5   | 13  | 3 | 0.65270  | 1.95811  | 0.00000   | -2.61082 | 0.00000   | 0.00000 | ; |
| 3   | 4   | 12  | 11  | 3 | 0.65270  | 1.95811  | 0.00000   | -2.61082 | 0.00000   | 0.00000 | ; |
| 4   | 5   | 6   | 7   | 3 | 0.65270  | 1.95811  | 0.00000   | -2.61082 | 0.00000   | 0.00000 | ; |
| 4   | 5   | 6   | 10  | 3 | 3.68192  | 3.09616  | -2.09200  | -3.01248 | 0.00000   | 0.00000 | ; |
| 4   | 5   | 13  | 14  | 3 | 0.00000  | 0.00000  | 0.00000   | 0.00000  | 0.00000   | 0.00000 | ; |
| 4   | 5   | 13  | 15  | 3 | 0.00000  | 0.00000  | 0.00000   | 0.00000  | 0.00000   | 0.00000 | ; |
| 4   | 12  | 11  | 10  | 3 | 3.68192  | 3.09616  | -2.09200  | -3.01248 | 0.00000   | 0.00000 | ; |
| 5   | 4   | 3   | 16  | 3 | 0.00000  | 0.00000  | 0.00000   | 0.00000  | 0.00000   | 0.00000 | ; |
| 5   | 4   | 12  | 11  | 3 | 3.68192  | 3.09616  | -2.09200  | -3.01248 | 0.00000   | 0.00000 | ; |
| 5   | 6   | 7   | 8   | 3 | 2.84512  | -4.10032 | 16.73600  | 2.51040  | -16.73600 | 0.00000 | ; |
| 5   | 6   | 10  | 11  | 3 | 3.68192  | 3.09616  | -2.09200  | -3.01248 | 0.00000   | 0.00000 | ; |
| 6   | 5   | 4   | 12  | 3 | 3.68192  | 3.09616  | -2.09200  | -3.01248 | 0.00000   | 0.00000 | ; |
| 6   | 5   | 13  | 14  | 3 | 0.00000  | 0.00000  | 0.00000   | 0.00000  | 0.00000   | 0.00000 | ; |
| 6   | 5   | 13  | 15  | 3 | 0.00000  | 0.00000  | 0.00000   | 0.00000  | 0.00000   | 0.00000 | ; |
| 6   | 7   | 8   | 9   | 3 | 20.92000 | 0.00000  | -20.92000 | 0.00000  | 0.00000   | 0.00000 | ; |
| 6   | 7   | 8   | 90  | 3 | 6.27600  | 6.27600  | 0.00000   | 0.00000  | 0.00000   | 0.00000 | ; |
| 6   | 10  | 11  | 12  | 3 | 3.68192  | 3.09616  | -2.09200  | -3.01248 | 0.00000   | 0.00000 | ; |
| 7   | 6   | 5   | 13  | 3 | 0.65270  | 1.95811  | 0.00000   | -2.61082 | 0.00000   | 0.00000 | ; |
| 7   | 6   | 10  | 11  | 3 | 0.65270  | 1.95811  | 0.00000   | -2.61082 | 0.00000   | 0.00000 | ; |
| 7   | 8   | 90  | 89  | 3 | 23.84880 | 7.11280  | -16.73600 | 0.00000  | 0.00000   | 0.00000 |   |

|    |    |    |     |   |          |          |           |          |           |         |   |
|----|----|----|-----|---|----------|----------|-----------|----------|-----------|---------|---|
| 12 | 4  | 3  | 16  | 3 | 0.00000  | 0.00000  | 0.00000   | 0.00000  | 0.00000   | 0.00000 | ; |
| 12 | 4  | 5  | 13  | 3 | 0.65270  | 1.95811  | 0.00000   | -2.61082 | 0.00000   | 0.00000 | ; |
| 17 | 1  | 27 | 28  | 3 | 0.00000  | 0.00000  | 0.00000   | 0.00000  | 0.00000   | 0.00000 | ; |
| 17 | 1  | 27 | 29  | 3 | 0.83680  | 0.00000  | -2.76144  | 0.00000  | 3.34720   | 0.00000 | ; |
| 17 | 18 | 19 | 20  | 3 | 33.47200 | 0.00000  | -33.47200 | 0.00000  | 0.00000   | 0.00000 | ; |
| 17 | 18 | 22 | 21  | 3 | 5.85760  | 0.00000  | -5.85760  | 0.00000  | 0.00000   | 0.00000 | ; |
| 17 | 18 | 22 | 23  | 3 | 5.85760  | 0.00000  | -5.85760  | 0.00000  | 0.00000   | 0.00000 | ; |
| 27 | 1  | 17 | 18  | 3 | 0.65270  | 1.95811  | 0.00000   | -2.61082 | 0.00000   | 0.00000 | ; |
| 18 | 19 | 20 | 21  | 3 | 14.22560 | 0.00000  | -14.22560 | 0.00000  | 0.00000   | 0.00000 | ; |
| 18 | 22 | 21 | 20  | 3 | 30.33400 | 0.00000  | -30.33400 | 0.00000  | 0.00000   | 0.00000 | ; |
| 18 | 22 | 21 | 26  | 3 | 30.33400 | 0.00000  | -30.33400 | 0.00000  | 0.00000   | 0.00000 | ; |
| 18 | 22 | 23 | 24  | 3 | 30.33400 | 0.00000  | -30.33400 | 0.00000  | 0.00000   | 0.00000 | ; |
| 19 | 18 | 22 | 21  | 3 | 5.85760  | 0.00000  | -5.85760  | 0.00000  | 0.00000   | 0.00000 | ; |
| 19 | 18 | 22 | 23  | 3 | 5.85760  | 0.00000  | -5.85760  | 0.00000  | 0.00000   | 0.00000 | ; |
| 19 | 20 | 21 | 22  | 3 | 2.51040  | 0.00000  | -2.51040  | 0.00000  | 0.00000   | 0.00000 | ; |
| 19 | 20 | 21 | 26  | 3 | 2.51040  | 0.00000  | -2.51040  | 0.00000  | 0.00000   | 0.00000 | ; |
| 20 | 19 | 18 | 22  | 3 | 33.47200 | 0.00000  | -33.47200 | 0.00000  | 0.00000   | 0.00000 | ; |
| 20 | 21 | 22 | 23  | 3 | 30.33400 | 0.00000  | -30.33400 | 0.00000  | 0.00000   | 0.00000 | ; |
| 20 | 21 | 26 | 25  | 3 | 30.33400 | 0.00000  | -30.33400 | 0.00000  | 0.00000   | 0.00000 | ; |
| 21 | 22 | 23 | 24  | 3 | 30.33400 | 0.00000  | -30.33400 | 0.00000  | 0.00000   | 0.00000 | ; |
| 21 | 26 | 25 | 24  | 3 | 30.33400 | 0.00000  | -30.33400 | 0.00000  | 0.00000   | 0.00000 | ; |
| 22 | 21 | 26 | 25  | 3 | 30.33400 | 0.00000  | -30.33400 | 0.00000  | 0.00000   | 0.00000 | ; |
| 22 | 23 | 24 | 25  | 3 | 30.33400 | 0.00000  | -30.33400 | 0.00000  | 0.00000   | 0.00000 | ; |
| 23 | 22 | 21 | 26  | 3 | 30.33400 | 0.00000  | -30.33400 | 0.00000  | 0.00000   | 0.00000 | ; |
| 23 | 24 | 25 | 26  | 3 | 30.33400 | 0.00000  | -30.33400 | 0.00000  | 0.00000   | 0.00000 | ; |
| 27 | 29 | 30 | 31  | 3 | 2.84512  | -4.10032 | 16.73600  | 2.51040  | -16.73600 | 0.00000 | ; |
| 27 | 29 | 30 | 34  | 3 | 2.84512  | -4.10032 | 16.73600  | 2.51040  | -16.73600 | 0.00000 | ; |
| 28 | 27 | 29 | 30  | 3 | 20.92000 | 0.00000  | -20.92000 | 0.00000  | 0.00000   | 0.00000 | ; |
| 29 | 30 | 31 | 32  | 3 | 0.65270  | 1.95811  | 0.00000   | -2.61082 | 0.00000   | 0.00000 | ; |
| 29 | 30 | 34 | 35  | 3 | 0.65270  | 1.95811  | 0.00000   | -2.61082 | 0.00000   | 0.00000 | ; |
| 29 | 30 | 34 | 36  | 3 | 0.65270  | 1.95811  | 0.00000   | -2.61082 | 0.00000   | 0.00000 | ; |
| 30 | 31 | 32 | 33  | 3 | 3.68192  | 3.09616  | -2.09200  | -3.01248 | 0.00000   | 0.00000 | ; |
| 30 | 34 | 35 | 101 | 3 | 0.00000  | 0.00000  | 0.00000   | 0.00000  | 0.00000   | 0.00000 | ; |
| 30 | 34 | 35 | 103 | 3 | 0.00000  | 0.00000  | 0.00000   | 0.00000  | 0.00000   | 0.00000 | ; |
| 30 | 34 | 36 | 33  | 3 | 3.68192  | 3.09616  | -2.09200  | -3.01248 | 0.00000   | 0.00000 | ; |
| 30 | 34 | 36 | 37  | 3 | 0.65270  | 1.95811  | 0.00000   | -2.61082 | 0.00000   | 0.00000 | ; |
| 31 | 30 | 34 | 35  | 3 | 0.65270  | 1.95811  | 0.00000   | -2.61082 | 0.00000   | 0.00000 | ; |
| 31 | 30 | 34 | 36  | 3 | 3.68192  | 3.09616  | -2.09200  | -3.01248 | 0.00000   | 0.00000 | ; |
| 31 | 32 | 33 | 36  | 3 | 3.68192  | 3.09616  | -2.09200  | -3.01248 | 0.00000   | 0.00000 | ; |
| 32 | 31 | 30 | 34  | 3 | 3.68192  | 3.09616  | -2.09200  | -3.01248 | 0.00000   | 0.00000 | ; |
| 32 | 33 | 36 | 34  | 3 | 3.68192  | 3.09616  | -2.09200  | -3.01248 | 0.00000   | 0.00000 | ; |
| 32 | 33 | 36 | 37  | 3 | 0.65270  | 1.95811  | 0.00000   | -2.61082 | 0.00000   | 0.00000 | ; |
| 33 | 36 | 34 | 35  | 3 | 0.65270  | 1.95811  | 0.00000   | -2.61082 | 0.00000   | 0.00000 | ; |
| 33 | 36 | 37 | 38  | 3 | 0.00000  | 0.00000  | 0.00000   | 0.00000  | 0.00000   | 0.00000 | ; |
| 33 | 36 | 37 | 39  | 3 | 0.83680  | 0.00000  | -2.76144  | 0.00000  | 3.34720   | 0.00000 | ; |
| 34 | 36 | 37 | 38  | 3 | 0.00000  | 0.00000  | 0.00000   | 0.00000  | 0.00000   | 0.00000 | ; |
| 34 | 36 | 37 | 39  | 3 | 0.83680  | 0.00000  | -2.76144  | 0.00000  | 3.34720   | 0.00000 | ; |
| 35 | 34 | 36 | 37  | 3 | 0.65270  | 1.95811  | 0.00000   | -2.61082 | 0.00000   | 0.00000 | ; |
| 36 | 34 | 35 | 101 | 3 | 0.00000  | 0.00000  | 0.00000   | 0.00000  | 0.00000   | 0.00000 | ; |
| 36 | 34 | 35 | 103 | 3 | 0.00000  | 0.00000  | 0.00000   | 0.00000  | 0.00000   | 0.00000 | ; |
| 36 | 37 | 39 | 40  | 3 | 6.27600  | 6.27600  | 0.00000   | 0.00000  | 0.00000   | 0.00000 | ; |
| 37 | 39 | 40 | 41  | 3 | 2.84512  | -4.10032 | 16.73600  | 2.51040  | -16.73600 | 0.00000 | ; |
| 37 | 39 | 40 | 51  | 3 | 10.46000 | -3.34720 | 0.00000   | 0.00000  | 0.00000   | 0.00000 | ; |
| 38 | 37 | 39 | 40  | 3 | 20.92000 | 0.00000  | -20.92000 | 0.00000  | 0.00000   | 0.00000 | ; |
| 39 | 40 | 41 | 42  | 3 | 0.65270  | 1.95811  | 0.00000   | -2.61082 | 0.00000   | 0.00000 | ; |
| 39 | 40 | 51 | 52  | 3 | 0.00000  | 0.00000  | 0.00000   | 0.00000  | 0.00000   | 0.00000 | ; |
| 39 | 40 | 51 | 53  | 3 | 23.84880 | 7.11280  | -16.73600 | 0.00000  | 0.00000   | 0.00000 | ; |
| 40 | 41 | 42 | 43  | 3 | 0.00000  | 0.00000  | 0.00000   | 0.00000  | 0.00000   | 0.00000 | ; |
| 40 | 41 | 42 | 46  | 3 | 0.00000  | 0.00000  | 0.00000   | 0.00000  | 0.00000   | 0.00000 | ; |
| 40 | 51 | 53 | 54  | 3 | 6.27600  | 6.27600  | 0.00000   | 0.00000  | 0.00000   | 0.00000 | ; |
| 41 | 40 | 51 | 52  | 3 | 0.00000  | 0.00000  | 0.00000   | 0.00000  | 0.00000   | 0.00000 | ; |
| 41 | 40 | 51 | 53  | 3 | 0.83680  | 0.00000  | -2.76144  | 0.00000  | 3.34720   | 0.00000 | ; |
| 41 | 42 | 43 | 44  | 3 | 33.47200 | 0.00000  | -33.47200 | 0.00000  | 0.00000   | 0.00000 | ; |
| 41 | 42 | 46 | 45  | 3 | 5.85760  | 0.00000  | -5.85760  | 0.00000  | 0.00000   | 0.00000 | ; |
| 41 | 42 | 46 | 47  | 3 | 5.85760  | 0.00000  | -5.85760  | 0.00000  | 0.00000   | 0.00000 | ; |
| 42 | 41 | 40 | 51  | 3 | 0.65270  | 1.95811  | 0.00000   | -2.61082 | 0.00000   | 0.00000 | ; |
| 42 | 43 | 44 | 45  | 3 | 14.22560 | 0.00000  | -14.22560 | 0.00000  | 0.00000   | 0.00000 | ; |
| 42 | 46 | 45 | 44  | 3 | 30.33400 | 0.00000  | -30.33400 | 0.00000  | 0.00000   | 0.00000 | ; |
| 42 | 46 | 45 | 50  | 3 | 30.33400 | 0.00000  | -30.33400 | 0.00000  | 0.00000   | 0.00000 | ; |
| 42 | 46 | 47 | 48  | 3 | 30.33400 | 0.00000  | -30.33400 | 0.00000  | 0.00000   | 0.00000 | ; |
| 43 | 42 | 46 | 45  | 3 | 5.85760  | 0.00000  | -5.85760  | 0.00000  | 0.00000   | 0.00000 | ; |
| 43 | 42 | 46 | 47  | 3 | 5.85760  | 0.00000  | -5.85760  | 0.00000  | 0.00000   | 0.00000 | ; |
| 43 | 44 | 45 | 46  | 3 | 2.51040  | 0.00000  | -2.51040  | 0.00000  | 0.00000   | 0.00000 | ; |
| 43 | 44 | 45 | 50  | 3 | 2.51040  | 0.00000  | -2.51040  | 0.00000  | 0.00000   | 0.00000 | ; |
| 44 | 43 | 42 | 46  | 3 | 33.47200 | 0.00000  | -33.47200 | 0.00000  | 0.00000   | 0.00000 | ; |
| 44 | 45 | 46 | 47  | 3 | 30.33400 | 0.00000  | -30.33400 | 0.00000  | 0.00000   | 0.00000 | ; |
| 44 | 45 | 50 | 49  | 3 | 30.33400 | 0.00000  | -30.33400 | 0.00000  | 0.00000   | 0.00000 | ; |
| 45 | 46 | 47 | 48  | 3 | 30.33400 | 0.00000  | -30.33400 | 0.00000  | 0.00000   | 0.00000 | ; |
| 45 | 50 | 49 | 48  | 3 | 30.33400 | 0.00000  | -30.33400 | 0.00000  | 0.00000   | 0.00000 | ; |
| 46 | 45 | 50 | 49  | 3 | 30.33400 | 0.00000  | -30.33400 | 0.00000  | 0.00000   | 0.00000 | ; |
| 46 | 47 | 48 | 49  | 3 | 30.33400 | 0.00000  | -30.33400 | 0.00000  | 0.00000   | 0.00000 | ; |
| 47 | 46 | 45 | 50  | 3 | 30.33400 | 0.00000  | -30.33400 | 0.00000  | 0.00000   | 0.00000 | ; |
| 47 | 48 | 49 | 50  | 3 | 30.33400 | 0.00000  | -30.33400 | 0.00000  | 0.00000   | 0.00000 | ; |
| 51 | 53 | 54 | 55  | 3 | 2.84512  | -4.10032 | 16.73600  | 2.51040  | -16.73600 | 0.00000 | ; |
| 51 | 53 | 54 | 58  | 3 | 2.84512  | -4.10032 | 16.73600  | 2.51040  | -16.73600 | 0.00000 | ; |
| 52 | 51 | 53 | 54  | 3 | 20.92000 | 0.00000  | -20.92000 | 0.00000  | 0.00000   | 0.00000 | ; |
| 53 | 54 | 55 | 56  | 3 | 0.65270  | 1.95811  | 0.00000   | -2.61082 | 0.00000   | 0.00000 | ; |
| 53 | 54 | 58 | 59  | 3 | 0.65270  | 1.95811  | 0.00000   | -2.61082 | 0.00000   | 0.00000 | ; |
| 53 | 54 | 58 | 62  | 3 | 0.65270  | 1.95811  | 0.00000   | -2.61082 | 0.00000   | 0.00000 | ; |
| 54 | 55 | 56 | 57  | 3 | 3.68192  | 3.09616  | -2.09200  | -3.01248 | 0.00000   | 0.00000 | ; |
| 54 | 58 | 59 | 60  | 3 | 0.00000  | 0.00000  | 0.00000   | 0.00000  | 0.00000   | 0.00000 | ; |
| 54 | 58 | 59 | 61  | 3 | 0.00000  | 0.00000  | 0.00000   | 0.00000  | 0.00000   | 0.00000 | ; |
| 54 | 58 | 62 | 57  | 3 | 3.68192  | 3.09616  | -2.09200  | -3.01248 | 0.00000   | 0.00000 | ; |
| 54 | 58 | 62 | 63  | 3 | 0.65270  | 1.95811  | 0.00000   | -2.61082 | 0.00000   | 0.00000 | ; |
| 55 | 54 | 58 | 59  | 3 | 0.65270  | 1.95811  | 0.00000   | -2.61082 | 0.00000   | 0.00000 | ; |
| 55 | 54 | 58 | 62  | 3 | 3.68192  | 3.09616  | -2.09200  | -3.01248 | 0.00000   | 0.00000 | ; |
| 55 | 56 | 57 | 62  | 3 | 3.68192  | 3.09616  | -2.09200  | -3.01248 | 0.00000   | 0.00000 | ; |
| 56 | 55 | 54 | 58  | 3 | 3.68192  | 3.09616  | -2.09200  | -3.01248 | 0.00000   | 0.00000 | ; |
| 56 | 57 | 62 | 58  | 3 | 3.68192  | 3.09616  | -2.09200  | -3.01248 | 0.00000   | 0.00000 | ; |
| 56 | 57 | 62 | 63  | 3 | 0.65270  | 1.95811  | 0.00000   | -2.61082 | 0.00000   | 0.00000 | ; |
| 57 | 62 | 58 | 59  | 3 | 0.65270  | 1.95811  | 0.00000   | -2.61082 | 0.00000   | 0.00000 | ; |
| 57 | 62 | 63 | 64  | 3 | 0.00000  | 0.00000  | 0.00000   | 0.00000  | 0.00000   | 0.00000 | ; |
| 57 | 62 | 63 | 65  | 3 | 0.83680  | 0.00000  | -2.76144  | 0.00000  | 3.34720   | 0.00000 | ; |
| 58 | 62 | 63 | 64  | 3 | 0.00000  | 0.00000  | 0.00000   | 0.00000  | 0.00000   | 0.00000 | ; |
| 58 | 62 | 63 | 65  | 3 | 0.83680  | 0.00000  | -2.76144  | 0.00000  | 3.34720   | 0.00000 | ; |
| 59 | 58 | 62 | 63  | 3 | 0.65270  | 1.95811  | 0.00000   | -2.61082 | 0.00000   | 0.00000 | ; |
| 60 | 59 | 58 | 62  | 3 | 0.00000  | 0.00000  | 0.00000   | 0.00000  | 0.00      |         |   |

|    |     |     |     |   |          |          |           |          |           |         |   |
|----|-----|-----|-----|---|----------|----------|-----------|----------|-----------|---------|---|
| 65 | 66  | 77  | 78  | 3 | 0.00000  | 0.00000  | 0.00000   | 0.00000  | 0.00000   | 0.00000 | ; |
| 65 | 66  | 77  | 79  | 3 | 23.84880 | 7.11280  | -16.73600 | 0.00000  | 0.00000   | 0.00000 | ; |
| 66 | 67  | 68  | 69  | 3 | 0.00000  | 0.00000  | 0.00000   | 0.00000  | 0.00000   | 0.00000 | ; |
| 66 | 67  | 68  | 72  | 3 | 0.00000  | 0.00000  | 0.00000   | 0.00000  | 0.00000   | 0.00000 | ; |
| 66 | 77  | 79  | 80  | 3 | 6.27600  | 6.27600  | 0.00000   | 0.00000  | 0.00000   | 0.00000 | ; |
| 67 | 66  | 77  | 78  | 3 | 0.00000  | 0.00000  | 0.00000   | 0.00000  | 0.00000   | 0.00000 | ; |
| 67 | 66  | 77  | 79  | 3 | 0.83680  | 0.00000  | -2.76144  | 0.00000  | 3.34720   | 0.00000 | ; |
| 67 | 68  | 69  | 70  | 3 | 33.47200 | 0.00000  | -33.47200 | 0.00000  | 0.00000   | 0.00000 | ; |
| 67 | 68  | 72  | 71  | 3 | 5.85760  | 0.00000  | -5.85760  | 0.00000  | 0.00000   | 0.00000 | ; |
| 67 | 68  | 72  | 73  | 3 | 5.85760  | 0.00000  | -5.85760  | 0.00000  | 0.00000   | 0.00000 | ; |
| 68 | 67  | 66  | 77  | 3 | 0.65270  | 1.95811  | 0.00000   | -2.61082 | 0.00000   | 0.00000 | ; |
| 68 | 69  | 70  | 71  | 3 | 14.22560 | 0.00000  | -14.22560 | 0.00000  | 0.00000   | 0.00000 | ; |
| 68 | 72  | 71  | 70  | 3 | 30.33400 | 0.00000  | -30.33400 | 0.00000  | 0.00000   | 0.00000 | ; |
| 68 | 72  | 71  | 76  | 3 | 30.33400 | 0.00000  | -30.33400 | 0.00000  | 0.00000   | 0.00000 | ; |
| 68 | 72  | 73  | 74  | 3 | 30.33400 | 0.00000  | -30.33400 | 0.00000  | 0.00000   | 0.00000 | ; |
| 69 | 68  | 72  | 71  | 3 | 5.85760  | 0.00000  | -5.85760  | 0.00000  | 0.00000   | 0.00000 | ; |
| 69 | 68  | 72  | 73  | 3 | 5.85760  | 0.00000  | -5.85760  | 0.00000  | 0.00000   | 0.00000 | ; |
| 69 | 70  | 71  | 72  | 3 | 2.51040  | 0.00000  | -2.51040  | 0.00000  | 0.00000   | 0.00000 | ; |
| 69 | 70  | 71  | 76  | 3 | 2.51040  | 0.00000  | -2.51040  | 0.00000  | 0.00000   | 0.00000 | ; |
| 70 | 69  | 68  | 72  | 3 | 33.47200 | 0.00000  | -33.47200 | 0.00000  | 0.00000   | 0.00000 | ; |
| 70 | 71  | 72  | 73  | 3 | 30.33400 | 0.00000  | -30.33400 | 0.00000  | 0.00000   | 0.00000 | ; |
| 70 | 71  | 76  | 75  | 3 | 30.33400 | 0.00000  | -30.33400 | 0.00000  | 0.00000   | 0.00000 | ; |
| 71 | 72  | 73  | 74  | 3 | 30.33400 | 0.00000  | -30.33400 | 0.00000  | 0.00000   | 0.00000 | ; |
| 71 | 76  | 75  | 74  | 3 | 30.33400 | 0.00000  | -30.33400 | 0.00000  | 0.00000   | 0.00000 | ; |
| 72 | 71  | 76  | 75  | 3 | 30.33400 | 0.00000  | -30.33400 | 0.00000  | 0.00000   | 0.00000 | ; |
| 72 | 73  | 74  | 75  | 3 | 30.33400 | 0.00000  | -30.33400 | 0.00000  | 0.00000   | 0.00000 | ; |
| 73 | 72  | 71  | 76  | 3 | 30.33400 | 0.00000  | -30.33400 | 0.00000  | 0.00000   | 0.00000 | ; |
| 73 | 74  | 75  | 76  | 3 | 30.33400 | 0.00000  | -30.33400 | 0.00000  | 0.00000   | 0.00000 | ; |
| 77 | 79  | 80  | 81  | 3 | 2.84512  | -4.10032 | 16.73600  | 2.51040  | -16.73600 | 0.00000 | ; |
| 77 | 79  | 80  | 84  | 3 | 2.84512  | -4.10032 | 16.73600  | 2.51040  | -16.73600 | 0.00000 | ; |
| 78 | 77  | 79  | 80  | 3 | 20.92000 | 0.00000  | -20.92000 | 0.00000  | 0.00000   | 0.00000 | ; |
| 79 | 80  | 81  | 82  | 3 | 0.65270  | 1.95811  | 0.00000   | -2.61082 | 0.00000   | 0.00000 | ; |
| 79 | 80  | 84  | 85  | 3 | 0.65270  | 1.95811  | 0.00000   | -2.61082 | 0.00000   | 0.00000 | ; |
| 79 | 80  | 84  | 86  | 3 | 0.65270  | 1.95811  | 0.00000   | -2.61082 | 0.00000   | 0.00000 | ; |
| 80 | 81  | 82  | 83  | 3 | 3.68192  | 3.09616  | -2.09200  | -3.01248 | 0.00000   | 0.00000 | ; |
| 80 | 84  | 85  | 102 | 3 | 0.00000  | 0.00000  | 0.00000   | 0.00000  | 0.00000   | 0.00000 | ; |
| 80 | 84  | 85  | 104 | 3 | 0.00000  | 0.00000  | 0.00000   | 0.00000  | 0.00000   | 0.00000 | ; |
| 80 | 84  | 86  | 83  | 3 | 3.68192  | 3.09616  | -2.09200  | -3.01248 | 0.00000   | 0.00000 | ; |
| 80 | 84  | 86  | 87  | 3 | 0.65270  | 1.95811  | 0.00000   | -2.61082 | 0.00000   | 0.00000 | ; |
| 81 | 80  | 84  | 85  | 3 | 0.65270  | 1.95811  | 0.00000   | -2.61082 | 0.00000   | 0.00000 | ; |
| 81 | 80  | 84  | 86  | 3 | 3.68192  | 3.09616  | -2.09200  | -3.01248 | 0.00000   | 0.00000 | ; |
| 81 | 82  | 83  | 86  | 3 | 3.68192  | 3.09616  | -2.09200  | -3.01248 | 0.00000   | 0.00000 | ; |
| 82 | 81  | 80  | 84  | 3 | 3.68192  | 3.09616  | -2.09200  | -3.01248 | 0.00000   | 0.00000 | ; |
| 82 | 83  | 86  | 84  | 3 | 3.68192  | 3.09616  | -2.09200  | -3.01248 | 0.00000   | 0.00000 | ; |
| 82 | 83  | 86  | 87  | 3 | 0.65270  | 1.95811  | 0.00000   | -2.61082 | 0.00000   | 0.00000 | ; |
| 83 | 86  | 84  | 85  | 3 | 0.65270  | 1.95811  | 0.00000   | -2.61082 | 0.00000   | 0.00000 | ; |
| 83 | 86  | 87  | 88  | 3 | 0.00000  | 0.00000  | 0.00000   | 0.00000  | 0.00000   | 0.00000 | ; |
| 83 | 86  | 87  | 89  | 3 | 0.83680  | 0.00000  | -2.76144  | 0.00000  | 3.34720   | 0.00000 | ; |
| 84 | 86  | 87  | 88  | 3 | 0.00000  | 0.00000  | 0.00000   | 0.00000  | 0.00000   | 0.00000 | ; |
| 84 | 86  | 87  | 89  | 3 | 0.83680  | 0.00000  | -2.76144  | 0.00000  | 3.34720   | 0.00000 | ; |
| 85 | 84  | 86  | 87  | 3 | 0.65270  | 1.95811  | 0.00000   | -2.61082 | 0.00000   | 0.00000 | ; |
| 86 | 84  | 85  | 102 | 3 | 0.00000  | 0.00000  | 0.00000   | 0.00000  | 0.00000   | 0.00000 | ; |
| 86 | 84  | 85  | 104 | 3 | 0.00000  | 0.00000  | 0.00000   | 0.00000  | 0.00000   | 0.00000 | ; |
| 86 | 87  | 89  | 90  | 3 | 6.27600  | 6.27600  | 0.00000   | 0.00000  | 0.00000   | 0.00000 | ; |
| 87 | 89  | 90  | 91  | 3 | 2.84512  | -4.10032 | 16.73600  | 2.51040  | -16.73600 | 0.00000 | ; |
| 88 | 87  | 89  | 90  | 3 | 20.92000 | 0.00000  | -20.92000 | 0.00000  | 0.00000   | 0.00000 | ; |
| 89 | 90  | 91  | 92  | 3 | 0.65270  | 1.95811  | 0.00000   | -2.61082 | 0.00000   | 0.00000 | ; |
| 90 | 91  | 92  | 93  | 3 | 0.00000  | 0.00000  | 0.00000   | 0.00000  | 0.00000   | 0.00000 | ; |
| 90 | 91  | 92  | 96  | 3 | 0.00000  | 0.00000  | 0.00000   | 0.00000  | 0.00000   | 0.00000 | ; |
| 91 | 92  | 93  | 94  | 3 | 33.47200 | 0.00000  | -33.47200 | 0.00000  | 0.00000   | 0.00000 | ; |
| 91 | 92  | 96  | 95  | 3 | 5.85760  | 0.00000  | -5.85760  | 0.00000  | 0.00000   | 0.00000 | ; |
| 91 | 92  | 96  | 97  | 3 | 5.85760  | 0.00000  | -5.85760  | 0.00000  | 0.00000   | 0.00000 | ; |
| 92 | 93  | 94  | 95  | 3 | 14.22560 | 0.00000  | -14.22560 | 0.00000  | 0.00000   | 0.00000 | ; |
| 92 | 96  | 95  | 94  | 3 | 30.33400 | 0.00000  | -30.33400 | 0.00000  | 0.00000   | 0.00000 | ; |
| 92 | 96  | 95  | 100 | 3 | 30.33400 | 0.00000  | -30.33400 | 0.00000  | 0.00000   | 0.00000 | ; |
| 92 | 96  | 97  | 98  | 3 | 30.33400 | 0.00000  | -30.33400 | 0.00000  | 0.00000   | 0.00000 | ; |
| 93 | 92  | 96  | 95  | 3 | 5.85760  | 0.00000  | -5.85760  | 0.00000  | 0.00000   | 0.00000 | ; |
| 93 | 92  | 96  | 97  | 3 | 5.85760  | 0.00000  | -5.85760  | 0.00000  | 0.00000   | 0.00000 | ; |
| 93 | 94  | 95  | 96  | 3 | 2.51040  | 0.00000  | -2.51040  | 0.00000  | 0.00000   | 0.00000 | ; |
| 93 | 94  | 95  | 100 | 3 | 2.51040  | 0.00000  | -2.51040  | 0.00000  | 0.00000   | 0.00000 | ; |
| 94 | 93  | 92  | 96  | 3 | 33.47200 | 0.00000  | -33.47200 | 0.00000  | 0.00000   | 0.00000 | ; |
| 94 | 95  | 96  | 97  | 3 | 30.33400 | 0.00000  | -30.33400 | 0.00000  | 0.00000   | 0.00000 | ; |
| 94 | 95  | 100 | 99  | 3 | 30.33400 | 0.00000  | -30.33400 | 0.00000  | 0.00000   | 0.00000 | ; |
| 95 | 96  | 97  | 98  | 3 | 30.33400 | 0.00000  | -30.33400 | 0.00000  | 0.00000   | 0.00000 | ; |
| 95 | 100 | 99  | 98  | 3 | 30.33400 | 0.00000  | -30.33400 | 0.00000  | 0.00000   | 0.00000 | ; |
| 96 | 95  | 100 | 99  | 3 | 30.33400 | 0.00000  | -30.33400 | 0.00000  | 0.00000   | 0.00000 | ; |
| 96 | 97  | 98  | 99  | 3 | 30.33400 | 0.00000  | -30.33400 | 0.00000  | 0.00000   | 0.00000 | ; |
| 97 | 96  | 95  | 100 | 3 | 30.33400 | 0.00000  | -30.33400 | 0.00000  | 0.00000   | 0.00000 | ; |
| 97 | 98  | 99  | 100 | 3 | 30.33400 | 0.00000  | -30.33400 | 0.00000  | 0.00000   | 0.00000 | ; |
| 4  | 2   | 3   | 16  | 3 | 87.86400 | 0.00000  | -87.86400 | 0.00000  | 0.00000   | 0.00000 | ; |
| 90 | 7   | 8   | 9   | 3 | 87.86400 | 0.00000  | -87.86400 | 0.00000  | 0.00000   | 0.00000 | ; |
| 5  | 14  | 13  | 15  | 3 | 9.20480  | 0.00000  | -9.20480  | 0.00000  | 0.00000   | 0.00000 | ; |
| 17 | 22  | 18  | 19  | 3 | 9.20480  | 0.00000  | -9.20480  | 0.00000  | 0.00000   | 0.00000 | ; |
| 22 | 26  | 21  | 20  | 3 | 9.20480  | 0.00000  | -9.20480  | 0.00000  | 0.00000   | 0.00000 | ; |
| 21 | 23  | 22  | 18  | 3 | 9.20480  | 0.00000  | -9.20480  | 0.00000  | 0.00000   | 0.00000 | ; |
| 1  | 29  | 27  | 28  | 3 | 87.86400 | 0.00000  | -87.86400 | 0.00000  | 0.00000   | 0.00000 | ; |
| 34 | 101 | 35  | 103 | 3 | 9.20480  | 0.00000  | -9.20480  | 0.00000  | 0.00000   | 0.00000 | ; |
| 36 | 39  | 37  | 38  | 3 | 87.86400 | 0.00000  | -87.86400 | 0.00000  | 0.00000   | 0.00000 | ; |
| 41 | 46  | 42  | 43  | 3 | 9.20480  | 0.00000  | -9.20480  | 0.00000  | 0.00000   | 0.00000 | ; |
| 46 | 50  | 45  | 44  | 3 | 9.20480  | 0.00000  | -9.20480  | 0.00000  | 0.00000   | 0.00000 | ; |
| 45 | 47  | 46  | 42  | 3 | 9.20480  | 0.00000  | -9.20480  | 0.00000  | 0.00000   | 0.00000 | ; |
| 40 | 53  | 51  | 52  | 3 | 87.86400 | 0.00000  | -87.86400 | 0.00000  | 0.00000   | 0.00000 | ; |
| 58 | 60  | 59  | 61  | 3 | 9.20480  | 0.00000  | -9.20480  | 0.00000  | 0.00000   | 0.00000 | ; |
| 62 | 65  | 63  | 64  | 3 | 87.86400 | 0.00000  | -87.86400 | 0.00000  | 0.00000   | 0.00000 | ; |
| 67 | 72  | 68  | 69  | 3 | 9.20480  | 0.00000  | -9.20480  | 0.00000  | 0.00000   | 0.00000 | ; |
| 72 | 76  | 71  | 70  | 3 | 9.20480  | 0.00000  | -9.20480  | 0.00000  | 0.00000   | 0.00000 | ; |
| 71 | 73  | 72  | 68  | 3 | 9.20480  | 0.00000  | -9.20480  | 0.00000  | 0.00000   | 0.00000 | ; |
| 66 | 79  | 77  | 78  | 3 | 87.86400 | 0.00000  | -87.86400 | 0.00000  | 0.00000   | 0.00000 | ; |
| 84 | 102 | 85  | 104 | 3 | 9.20480  | 0.00000  | -9.20480  | 0.00000  | 0.00000   | 0.00000 | ; |
| 86 | 89  | 87  | 88  | 3 | 87.86400 | 0.00000  | -87.86400 | 0.00000  | 0.00000   | 0.00000 | ; |
| 91 | 96  | 92  | 93  | 3 | 9.20480  | 0.00000  | -9.20480  | 0.00000  | 0.00000   | 0.00000 | ; |
| 96 | 100 | 95  | 94  | 3 | 9.20480  | 0.00000  | -9.20480  | 0.00000  | 0.00000   | 0.00000 | ; |
| 95 | 97  | 96  | 92  | 3 | 9.20480  | 0.00000  | -9.20480  | 0.00000  | 0.00000   | 0.00000 | ; |
